# Supplementary material for: Influence of the COVID-19 pandemic and social media on the behaviour of pregnant and lactating women towards vaccination: a scoping review
Source: PubMed Central journal article supplement — BMJ Open. 2023 Feb 10;13(2):e066367. doi: 10.1136/bmjopen-2022-066367 (PMC9922880; doi:10.1136/bmjopen-2022-066367), 2023-02-10
Supplement: bmjopen-2022-066367.draft_revisions.pdf [file bmjopen-2022-066367.draft_revisions.pdf]

# BMJ Open

BMJ Open is committed to open peer review. As part of this commitment we make the peer review history of every article we publish publicly available.

When an article is published we post the peer reviewers' comments and the authors' responses online. We also post the versions of the paper that were used during peer review. These are the versions that the peer review comments apply to.

The versions of the paper that follow are the versions that were submitted during the peer review process. They are not the versions of record or the final published versions. They should not be cited or distributed as the published version of this manuscript.

BMJ Open is an open access journal and the full, final, typeset and author-corrected version of record of the manuscript is available on our site with no access controls, subscription charges or pay-per-view fees (<http://bmjopen.bmj.com>).

If you have any questions on BMJ Open's open peer review process please email [info.bmjopen@bmj.com](mailto:info.bmjopen@bmj.com)

# BMJ Open

## The influence of the COVID-19 pandemic and social media on behaviour of pregnant and lactating women towards vaccination: a scoping review

|                               |                                                                                                                                                                                                                                                                                                                                                                                                                                                                                                                                                                                                                                                                                                                                                                                                                                                                                                    |
|-------------------------------|----------------------------------------------------------------------------------------------------------------------------------------------------------------------------------------------------------------------------------------------------------------------------------------------------------------------------------------------------------------------------------------------------------------------------------------------------------------------------------------------------------------------------------------------------------------------------------------------------------------------------------------------------------------------------------------------------------------------------------------------------------------------------------------------------------------------------------------------------------------------------------------------------|
| Journal:                      | <i>BMJ Open</i>                                                                                                                                                                                                                                                                                                                                                                                                                                                                                                                                                                                                                                                                                                                                                                                                                                                                                    |
| Manuscript ID                 | bmjopen-2022-066367                                                                                                                                                                                                                                                                                                                                                                                                                                                                                                                                                                                                                                                                                                                                                                                                                                                                                |
| Article Type:                 | Original research                                                                                                                                                                                                                                                                                                                                                                                                                                                                                                                                                                                                                                                                                                                                                                                                                                                                                  |
| Date Submitted by the Author: | 09-Aug-2022                                                                                                                                                                                                                                                                                                                                                                                                                                                                                                                                                                                                                                                                                                                                                                                                                                                                                        |
| Complete List of Authors:     | De Brabandere, Larissa; University of Antwerp Faculty of Medicine and Health Sciences, Centre for the Evaluation of Vaccination, Vaccine & Infectious Diseases Institute<br>Hendrickx, Greet; University of Antwerp Faculty of Medicine and Health Sciences, Centre for the Evaluation of Vaccination, Vaccine & Infectious Diseases Institute<br>Poels, Karolien; University of Antwerp, Media, ICT & Organizations and Society, Department of Communication Sciences<br>Daelemans, Walter; University of Antwerp, CLiPS, Department of Linguistics<br>Van Damme, Pierre; University of Antwerp Faculty of Medicine and Health Sciences, Centre for the Evaluation of Vaccination, Vaccine & Infectious Diseases Institute<br>Maertens, Kirsten; University of Antwerp Faculty of Medicine and Health Sciences, Centre for the Evaluation of Vaccination, Vaccine & Infectious Diseases Institute |
| Keywords:                     | COVID-19, Public health < INFECTIOUS DISEASES, PREVENTIVE MEDICINE                                                                                                                                                                                                                                                                                                                                                                                                                                                                                                                                                                                                                                                                                                                                                                                                                                 |
|                               |                                                                                                                                                                                                                                                                                                                                                                                                                                                                                                                                                                                                                                                                                                                                                                                                                                                                                                    |

SCHOLARONE™  
Manuscripts

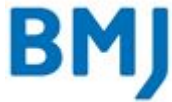

I, the Submitting Author has the right to grant and does grant on behalf of all authors of the Work (as defined in the below author licence), an exclusive licence and/or a non-exclusive licence for contributions from authors who are: i) UK Crown employees; ii) where BMJ has agreed a CC-BY licence shall apply, and/or iii) in accordance with the terms applicable for US Federal Government officers or employees acting as part of their official duties; on a worldwide, perpetual, irrevocable, royalty-free basis to BMJ Publishing Group Ltd ("BMJ") its licensees and where the relevant Journal is co-owned by BMJ to the co-owners of the Journal, to publish the Work in this journal and any other BMJ products and to exploit all rights, as set out in our [licence](#).

The Submitting Author accepts and understands that any supply made under these terms is made by BMJ to the Submitting Author unless you are acting as an employee on behalf of your employer or a postgraduate student of an affiliated institution which is paying any applicable article publishing charge ("APC") for Open Access articles. Where the Submitting Author wishes to make the Work available on an Open Access basis (and intends to pay the relevant APC), the terms of reuse of such Open Access shall be governed by a Creative Commons licence – details of these licences and which [Creative Commons](#) licence will apply to this Work are set out in our licence referred to above.

Other than as permitted in any relevant BMJ Author's Self Archiving Policies, I confirm this Work has not been accepted for publication elsewhere, is not being considered for publication elsewhere and does not duplicate material already published. I confirm all authors consent to publication of this Work and authorise the granting of this licence.

1  
2  
3 **The influence of the COVID-19 pandemic and social media on behaviour**  
4 **of pregnant and lactating women towards vaccination: a scoping review**  
5

6 Larissa De Brabandere<sup>1</sup>, Greet Hendrickx<sup>1</sup>, Karolien Poels<sup>2</sup>, Walter Daelemans<sup>3</sup>, Pierre Van  
7  
8 Damme<sup>1</sup>, Kirsten Maertens<sup>1</sup>  
9  
10  
11  
12

13  
14  
15 <sup>1</sup> Centre for the Evaluation of Vaccination, Vaccine & Infectious Diseases Institute, University  
16  
17 of Antwerp, Antwerp, Belgium  
18

19  
20 <sup>2</sup> Media, ICT & Organizations and Society, Department of Communication Studies, University  
21  
22 of Antwerp, Antwerp, Belgium  
23

24  
25 <sup>3</sup> CLiPS, Department for Linguistics, University of Antwerp, Antwerp, Belgium  
26  
27  
28

29  
30 Keywords: COVID-19, Public Health, Preventive Medicine  
31

32 Word count: 3886  
33

34 Corresponding author:  
35

36 Kirsten Maertens, PhD, Prof  
37  
38

39 Centre for the Evaluation of Vaccination, Vaccine & Infectious Diseases Institute, University  
40  
41 of Antwerp, Belgium  
42  
43

44 Mail: [kirsten.maertens@uantwerpen.be](mailto:kirsten.maertens@uantwerpen.be)  
45

46  
47 Alternate corresponding author:  
48

49 Larissa De Brabandere, MD  
50  
51

52 Centre for the Evaluation of Vaccination, Vaccine & Infectious Diseases Institute, University  
53  
54 of Antwerp, Belgium  
55

56 Mail: [larissa.debrabandere@uantwerpen.be](mailto:larissa.debrabandere@uantwerpen.be)  
57  
58  
59  
60

## Abstract

### OBJECTIVES

Pregnant women, foetuses and infants are at risk for infectious disease-related complications. Maternal vaccination is a strategy developed to better protect pregnant women and their offspring against infectious disease-related morbidity and mortality and is already implemented on a broad scale for influenza, pertussis and recently also for COVID-19. Yet, still a significant amount of hesitancy towards maternal vaccination policies exists. Furthermore, contradictory messages circulating on social media impact vaccine confidence.

This scoping review aims to give an answer on the impact of COVID-19 and COVID-19 vaccination on vaccine confidence in pregnant and lactating women. Additionally, the role of social media in creating opinions towards vaccination in these target groups is studied.

### METHODS

Literature was searched using the PubMed database. Search terms linked to pregnancy, lactation, vaccination, vaccine hesitancy, COVID-19 and social media were used. In total, 37 papers were included in this review. Two additional papers were yielded via the snowball method.

### RESULTS

Although there is a wide variety in COVID-19 vaccine acceptance during pregnancy and lactation according to period and region, pregnant and lactating women are in general less likely to accept a COVID-19 vaccine compared to non-pregnant and non-nursing women. The main reason to refuse maternal vaccination are safety concerns, both for the baby as well as for the woman herself. A positive link between COVID-19 vaccine willingness and acceptance of other vaccines during pregnancy was detected. Internet and social media are identified as important information sources for maternal vaccination.

### DISCUSSION & CONCLUSION

Vaccine hesitancy in pregnant and lactating women remains an important issue, expressing the need for new and effective interventions to increase vaccine confidence and coverage. The role of social media in vaccine uptake remains unclear. However, social media messages impact vaccine confidence in pregnant and lactating women.

### Strengths and limitations

- A concrete research question with targeted search terms was used for completing this review.
- The search was only limited to one database (PubMed) and not systematic, which can lead to the lack of certain information.

For peer review only

## Introduction

Several infectious diseases are associated with adverse outcomes in pregnant women, foetuses and infants. Therefore, in recent years, both the strategy of vaccination during pregnancy as well as vaccination during lactation is gaining more interest in view of its ability to reduce infectious disease-related morbidity and mortality in these target populations (1–3).

When pregnant women contract influenza, they have an increased risk for influenza-related complications and hospitalisation compared to non-pregnant women (2,4). Besides, influenza infections during pregnancy are also linked to an increased risk for preterm delivery and small for gestational age infants. Additionally, infants below six months of age are at high risk for severe influenza, often associated with hospitalisation and mortality (2).

Next, pertussis mainly forms a serious threat for neonates with the highest incidence, disease burden and case fatality rate in the first year of life (5,6).

A COVID-19 infection during pregnancy is not only linked to an increased risk for hospitalisation, admission to intensive care unit and death in pregnant women themselves (7,8), but also a higher risk for preterm delivery, stillbirth and pre-eclampsia is described (7,9,10). Furthermore, low birth weight, foetal distress and other respiratory symptoms are more frequent in neonates born to a COVID-19 infected mother (7,10). Infants infected with COVID-19 in the postpartum period can experience critical illness (11).

To better protect pregnant women, foetuses and infants against infectious disease-related complications, vaccination during pregnancy is an important approach and already implemented for influenza, pertussis and recently for COVID-19 by public health authorities worldwide (5,12–15).

After vaccinating during pregnancy, vaccine-specific antibodies are induced protecting pregnant women from severe illness. Subsequently, these vaccine-induced antibodies are transferred from mother to baby across the placenta during pregnancy and after birth via breastfeeding (12). Therefore, if women did not receive a pertussis and/or influenza vaccine during pregnancy or are not yet fully vaccinated against COVID-19 with the advised vaccine doses, it is recommended to vaccinate in the postpartum period (16,17).

1  
2  
3 Despite the proven benefit of vaccination during pregnancy and lactation and the  
4 implementation of the vaccination strategy on a broad scale, there still exists a significant  
5 amount of hesitancy towards maternal vaccination policies, reflected by poor vaccine uptake  
6 in diverse regions and various or lacking maternal vaccination programs and  
7 recommendations in different countries (12,13,18,19). Before the start of the COVID-19  
8 pandemic, Kilich et al. defined in a systematic review factors that could possibly influence  
9 vaccination decision-making among pregnant women where they defined a recommendation  
10 to vaccinate during pregnancy by a healthcare provider (HCP) as the most important factor.  
11 However, other determinants such as previous vaccination behaviour and vaccine-specific  
12 factors can mute this HCP recommendation. Also, they stated that some pregnant women  
13 searched for information about vaccination through Internet or other media, but these  
14 channels were not noted as the most trustworthy by these women (20).  
15  
16  
17  
18  
19  
20  
21  
22  
23  
24  
25  
26

27 With the still ongoing COVID-19 pandemic waves and the licensing of COVID-19 vaccines, the  
28 vaccine debate flared up again. Pregnant and lactating women were initially excluded from  
29 pre-marketing clinical trials for licensing of COVID-19 vaccines resulting in doubts about  
30 safety, immunogenicity and efficacy of the vaccines in these target groups. However, based  
31 on evidence generated from other vaccines already used in pregnant and lactating women,  
32 no safety or efficacy issues were expected. After weighing the vaccine benefits against the  
33 disease complications, different countries immediately started to approve COVID-19  
34 vaccination in these groups. Different opinions, scientifically based or not, were shared via all  
35 sorts of social media, both by the general public as well as by HCPs. This scoping review  
36 updates the review of Kilich et al. and moreover, includes factors influencing vaccine decision-  
37 making in lactating women. The review gives an answer on the impact of COVID-19 and its  
38 accompanying vaccination campaign on vaccine confidence in pregnant and breastfeeding  
39 women. Additionally, the role of social media in creating opinions towards vaccination during  
40 pregnancy and/or lactation is studied.  
41  
42  
43  
44  
45  
46  
47  
48  
49  
50  
51  
52  
53  
54  
55  
56  
57  
58  
59  
60



## Methods

To conduct this scoping review, literature was searched using the database PubMed. Keywords were identified based on the systematic review by Kilich et al. (20) and additional search terms linked to social media and COVID-19 were added:

vaccin\*, immuniz\*, immunis\*, antibodies, immune response, confidence, awareness, attitude\*, anxiety, trust\*, intent\*, dilemma, perception\*, misconception\*, behaviour, behavior, anti-vaccin\*, decision making, vaccination refusal, fear\*, distrust, mistrust, hesitancy, controvers\*, belief\*, criticis\*, misinformation, intent\*, choice\*, concern\*, knowledge, acceptance, willingness, uptake, barrier\*, disinformation, complacency, fake news, pregnan\*, maternal, prenatal, antenatal, parent\*, lactating\*, lactation, breast milk, breastfeeding, social media, internet, website\*, communication\*, social network\*, social behavior, social behaviour, message\*, forum, fora, blog\*, discussion group\*, online, Facebook, Twitter, Pinterest, LinkedIn, Instagram, Reddit, Youtube, Messenger, Whatsapp, Telegram, COVID\*, SARS-CoV-2, COVID19\*, corona\*.

Publication date was limited from November 23<sup>rd</sup> 2018 since Kilich et al. searched articles published by November 22<sup>nd</sup> 2018. The search was done on July 18<sup>th</sup> 2022.

Overall, 477 records were identified via our PubMed search. All records were screened by title and abstract, from which 46 were retained to screen by full text. Articles without mentioning pregnant and/or lactating women, COVID-19 pandemic or vaccination and/or social media were excluded. Finally, after screening by full text, 37 records were selected to be included in this scoping review. The references of the selected records were also screened (“snowball method”). This method yielded two additional articles.

### *Patient and public involvement*

None

## Results

### 1. COVID-19 VACCINE ACCEPTANCE IN PREGNANT, PLANNING TO BE PREGNANT AND LACTATING WOMEN

In total, 32 articles about willingness to get vaccinated against COVID-19 during pregnancy, lactation and when planning to get pregnant were identified and included in this review. A summary of the selected articles can be found in Table 1.

#### 1.1. *COVID-19 vaccine confidence in pregnant women and women planning to be pregnant*

Several studies were conducted in pregnant and lactating women before the availability of COVID-19 vaccines (N= 12). Of these studies, four found that pregnant women were less likely to accept a future COVID-19 vaccine (29.7%-62.1%) in comparison to breastfeeding women (38.6%-69.0%) and non-pregnant women (73.4%-81.2%) (21–24). In contrast, Erchick et al. found that more pregnant women (65.9%) were willing to get vaccinated against COVID-19 compared to non-pregnant women (59.6%), although the difference was not significant (25). In addition, Tao et al. also detected a high COVID-19 vaccine acceptance rate in pregnant women in China, i.e. 77.4% (26). Also, willingness to get vaccinated during pregnancy varied largely by country: COVID-19 vaccine readiness level was above 80.0% for pregnant women in India and Mexico and lower than 45.0% in Russia, Australia and the USA (22). Within the study of Ceulemans et al., six European countries were compared. The highest COVID-19 vaccine willingness during pregnancy was seen in Belgium (78.1%) whereas the lowest rate was found in Switzerland (29.7%) (21).

Twenty surveys were performed after licensure of COVID-19 vaccines, but some before there was an official recommendation from WHO and/or national authorities to vaccinate all pregnant women against COVID-19. Sutton et al. concluded that pregnant women, at that moment, were still less likely to accept a COVID-19 vaccine (44.3%) compared to breastfeeding (55.2%) and non-pregnant women (76.2%) (27). Samannodi et al. made the same significant conclusion for pregnant women and women planning to get pregnant compared to non-pregnant women and women not planning to get pregnant (28). Perez et al. divided their responders into two groups: i.e. (1) female HCPs preventing pregnancy (2) female HCPs who

1  
2  
3 are pregnant/lactating/attempting pregnancy. They found a significant difference in vaccine  
4 desire between both groups where group (1) desired significantly more to receive the vaccine  
5 compared to group (2) (29). Thirteen studies also mentioned COVID-19 vaccine coverage rates  
6 in pregnant women. Schaal et al. measured COVID-19 vaccine coverages in pregnant women  
7 in Germany at the same time period (March-April 2021) as Razzaghi et al. in the USA with a  
8 remarkable difference in coverage between both studies: 2.4% in Germany versus 21.7% in  
9 the USA (30,31).  
10  
11  
12  
13  
14  
15  
16

### 17 1.2. COVID-19 vaccine confidence in lactating women

18  
19 Fifteen studies included lactating/postpartum women in their study population of which three  
20 studies found that lactating women were more likely to accept a COVID-19 vaccine (39.4%-  
21 69.0%) compared to pregnant women (13.8%-61.0%) (21,27,31). Nevertheless, lactating  
22 women remain less willing to receive a COVID-19 vaccine than non-pregnant and non-nursing  
23 women (27). In the follow-up study of Germann et al., 35.0% of postpartum women were  
24 willing to be vaccinated compared to only 14.0% of pregnant women. However, breastfeeding  
25 status of the postpartum women was not clear (32). Gutierrez et al. found that women  
26 currently nursing or planning to breastfeed were less willing to receive COVID-19 vaccination  
27 compared to women who were not (33). As for pregnant women, there is a wide variety of  
28 acceptance among different countries with a 79.2% acceptance rate in Belgium compared to  
29 38.6% in Switzerland (21).  
30  
31  
32  
33  
34  
35  
36  
37  
38  
39  
40  
41  
42  
43  
44  
45  
46  
47  
48  
49  
50  
51  
52  
53  
54  
55  
56  
57  
58  
59  
60

1  
2  
3  
4  
5  
6  
7  
8  
9  
10  
11  
12  
13  
14  
15  
16  
17  
18  
19  
20  
21  
22  
23  
24  
25  
26  
27  
28  
29  
30  
31  
32  
33  
34  
35  
36  
37  
38  
39  
40  
41  
42  
43  
44  
45  
46

| Table 1: overview of vaccine confidence studies of COVID-19 vaccines in pregnant / lactating women |           |                           |                                                   |                  |                                                                                       |                                       |                                                                            |
|----------------------------------------------------------------------------------------------------|-----------|---------------------------|---------------------------------------------------|------------------|---------------------------------------------------------------------------------------|---------------------------------------|----------------------------------------------------------------------------|
| Authors (year of publication)                                                                      | Reference | Study period              | Country of execution                              | Study design     | N° of participants                                                                    | COVID-19 vaccine coverage             | COVID-19 vaccine willingness                                               |
| Abuhammad (2022)                                                                                   | (34)      | Sept 2021 – Oct 2021      | Jordan                                            | Survey           | 414 participants:<br>195 pregnant women<br>218 lactating women                        | 50.8% in pregnant and lactating women | NA                                                                         |
| Ceulemans et al. (2021)                                                                            | (21)      | 16 Jun 2020 – 14 Jul 2020 | Ireland, Norway, Switzerland, the Netherlands, UK | Survey           | 16063 participants:<br>6661 pregnant women<br>9402 lactating women                    | NA                                    | 61.0% by pregnant women<br>69.0% by lactating women                        |
|                                                                                                    |           | 10 Apr 2020 – 31 May 2020 | Belgium                                           |                  |                                                                                       |                                       |                                                                            |
| Citu et al. (2022)                                                                                 | (35)      | 1 Oct 2021 – 1 Dec 2021   | Romania                                           | Survey           | 345 participants:<br>184 pregnant women<br>161 non-pregnant women of reproductive age | NA                                    | 47.8% by pregnant women<br>59.7% by non-pregnant women of reproductive age |
| Citu et al. (2022)                                                                                 | (36)      | 1 Jan 2022 – 1 May 2022   | Romania                                           | Survey           | 345 pregnant women                                                                    | 53.3% in pregnant women               | NA                                                                         |
| Egloff et al. (2022)                                                                               | (37)      | 18 Feb 2021 – 5 Apr 2021  | France                                            | Survey           | 664 pregnant women                                                                    | NA                                    | 29.5% by pregnant women                                                    |
| Erchick et al. (2022)                                                                              | (25)      | 15 Dec 2020 – 23 Dec 2020 | USA                                               | Survey           | 8481 participants:<br>233 pregnant women<br>8248 non-pregnant women                   | NA                                    | 65.9% by pregnant women<br>59.6% by non-pregnant women                     |
| Geoghegan et al. (2021)                                                                            | (38)      | 4 Dec 2020 – 14 Jan 2021  | Ireland                                           | Survey           | 300 pregnant women                                                                    | NA                                    | 38.0% during pregnancy<br>63.0% after pregnancy                            |
| Germann et al. (2022)                                                                              | (32)      | 22 Mar 2021 – 2 Apr 2021  | USA                                               | Survey           | 456 participants:<br>435 pregnant women<br>21 postpartum women                        | NA                                    | 60.0% by pregnant and postpartum women                                     |
|                                                                                                    |           | 29 Jun 2021 – 20 Nov 2021 |                                                   | Follow-up survey | 290 participants:<br>68 pregnant women<br>222 postpartum women                        |                                       |                                                                            |
| Gutierrez et al. (2022)                                                                            | (33)      | Jan 2021                  | USA                                               | Survey           | 5269 participants:<br>1190 pregnant and postpartum women                              | NA                                    | 53.4% by pregnant and postpartum women<br>57.1% by other participants      |
| Hosokawa et al. (2022)                                                                             | (39)      | 24 Jul 2021 – 30 Aug 2021 | Japan                                             | Survey           | 1621 pregnant women                                                                   | 13.4% in pregnant women               | 49.1% by pregnant women                                                    |
| Kuciel et al. (2022)                                                                               | (40)      | 1 Jul 2021 – 30 Aug 2021  | Poland                                            | Survey           | 118 participants:<br>28 pregnant women<br>60 lactating women                          | NA                                    | NA                                                                         |

|                         |      |                             |              |        |                                                                                                                                                                                                       |                           |                                                                                      |
|-------------------------|------|-----------------------------|--------------|--------|-------------------------------------------------------------------------------------------------------------------------------------------------------------------------------------------------------|---------------------------|--------------------------------------------------------------------------------------|
|                         |      |                             |              |        | 109 mothers                                                                                                                                                                                           |                           |                                                                                      |
| Levy et al. (2021)      | (41) | 14 Dec 2020 – 14 Jan 2021   | USA          | Survey | 662 pregnant women                                                                                                                                                                                    | NA                        | 58.3% by pregnant women                                                              |
| Mappa et al. (2021)     | (42) | 27 Dec 2020                 | Italy        | Survey | 161 pregnant women                                                                                                                                                                                    | NA                        | 52.9% by pregnant women                                                              |
| Mohan et al. (2021)     | (43) | 15 Oct 2020 – 15 Nov 2020   | Qatar        | Survey | 341 pregnant and lactating women                                                                                                                                                                      | NA                        | 49.1% by participants                                                                |
| Nguyen et al. (2021)    | (44) | Jan – Feb 2021              | Vietnam      | Survey | 651 participants: pregnant women or just delivered                                                                                                                                                    | NA                        | 60.4% by all participants                                                            |
| Oluklu et al. (2021)    | (45) | 11 Feb 2021 – 21 Mar 2021   | Turkey       | Survey | 412 postpartum women:<br>363 lactating women                                                                                                                                                          | NA                        | 33.3% by postpartum women                                                            |
| Perez et al. (2021)     | (29) | 8 Jan 2021 – 31 Jan 2021    | USA          | Survey | 11405 female HCP of reproductive age:<br>955 women & 67 lactating attempting pregnancy<br>2196 pregnant women<br>2250 lactating women<br>91 women pregnant and lactating<br>5846 preventing pregnancy | 73.6% in all participants | 75.3% of all participants strongly desire(d) vaccination – 1.5% are strongly adverse |
| Perrotta et al. (2022)  | (46) | 1 Mar 2021 – 23 Jul 2021    | USA          | Survey | 299 pregnant women                                                                                                                                                                                    | 20.7% in pregnant women   | 42.8% by pregnant women                                                              |
| Pisula et al. (2022)    | (47) | 24 Oct 2021 – 9 Nov 2021    | Poland       | Survey | 515 pregnant women                                                                                                                                                                                    | 58.1% in pregnant women   | 6.2% by pregnant women                                                               |
| Razzaghi et al. (2022)  | (30) | 31 Mar 2021 – 16 Apr 2021   | USA          | Survey | 1561 pregnant women                                                                                                                                                                                   | 21.7% in pregnant women   | 24.0% by pregnant women                                                              |
| Redmond et al. (2022)   | (48) | June 2020 – Aug 2020        | USA          | Survey | 26 pregnant women<br>1 postpartum woman                                                                                                                                                               | NA                        | 63.0% by pregnant and postpartum women                                               |
| Riad et al. (2021)      | (49) | Aug 2021 – Oct 2021         | Czechia      | Survey | 362 participants:<br>278 pregnant women<br>84 lactating women                                                                                                                                         | NA                        | 66.6% by pregnant and lactating women                                                |
| Saleh et al. (2022)     | (50) | End Sep 2020 – mid-Jan 2021 | Israel       | Survey | 410 participants:<br>293 pregnant women<br>117 postpartum women of whom 84 were lactating                                                                                                             | NA                        | 40% by participants <u>after giving birth</u>                                        |
| Samannodi et al. (2021) | (51) | 12 Jun 2021 – 1 Aug 2021    | Saudi Arabia | Survey | 431 women:<br>214 women pregnant or planning to be pregnant                                                                                                                                           | 57.1% in all participants | NA                                                                                   |

|                             |      |                             |                                                                                                                                           |                            |                                                                                           |                                                                                  |                                                                                    |
|-----------------------------|------|-----------------------------|-------------------------------------------------------------------------------------------------------------------------------------------|----------------------------|-------------------------------------------------------------------------------------------|----------------------------------------------------------------------------------|------------------------------------------------------------------------------------|
| Schaal et al. (2021)        | (31) | 30 Mar 2021 – 19 Apr 2021   | Germany                                                                                                                                   | Survey                     | 2339 participants:<br>1043 pregnant women<br>1296 lactating women                         | 2.4% in pregnant women<br>13.7% in lactating women                               | 13.8% by pregnant women<br>39.4% by lactating women                                |
| Skirrow et al. (2022)       | (24) | 3 Aug 2020 – 11 Oct 2020    | UK                                                                                                                                        | Survey                     | 1181 pregnant women                                                                       | NA                                                                               | 62.1% during current pregnancy<br>81.2% <u>after delivery</u>                      |
|                             |      | 7 Dec 2020 – 16 Dec 2020    |                                                                                                                                           | Semi-structured interviews | 10 pregnant women                                                                         |                                                                                  |                                                                                    |
| Skjefte et al. (2021)       | (22) | 28 Oct 2020 – 18 Nov 2020   | Italy, Chile, Peru, New Zealand, Russia, Australia, Colombia, Brazil, Spain, South Africa, India, Mexico, Philippines, Argentina, USA, UK | Survey                     | 17871 participants:<br>5294 pregnant women<br>12562 non-pregnant women                    | NA                                                                               | 52.0% by pregnant women<br>73.4% by non-pregnant women                             |
| Stuckelberger et al. (2021) | (52) | 18 Jun 2020 – 12 Jul 2020   | Switzerland                                                                                                                               | Survey                     | 1551 participants:<br>515 pregnant women<br>1036 lactating women                          | NA                                                                               | 29.7% by pregnant women<br>38.6% by lactating women                                |
| Sutton et al. (2021)        | (27) | 7 Jan 2021 – 29 Jan 2021    | USA                                                                                                                                       | Survey                     | 1012 participants:<br>216 pregnant women<br>122 lactating women<br>656 non-pregnant women | 1.9% in pregnant women<br>3.3% in lactating women<br>13.3% in non-pregnant women | 44.3% by pregnant women<br>55.2% by lactating women<br>76.2% by non-pregnant women |
| Tao et al. (2021)           | (26) | 13 Nov 2020 – 27 Nov 2020   | China                                                                                                                                     | Survey                     | 1392 pregnant women                                                                       | NA                                                                               | 77.0% by pregnant women                                                            |
| Ward et al. (2022)          | (53) | NA                          | Australia                                                                                                                                 | Survey                     | 218 pregnant women                                                                        | 44.0% in pregnant women                                                          | 7.4% by pregnant women                                                             |
| Waring et al. (2022)        | (54) | Mid-Feb 2021 – Mid-Mar 2021 | USA                                                                                                                                       | Survey                     | 203 women:<br>15 pregnant women<br>188 non-pregnant women (mothers)                       | 47.3% in pregnant and non-pregnant women                                         | 66.0% by pregnant women<br>73.0% by non-pregnant women                             |

## 2. COVID-19 VACCINE CONFIDENCE IN HCP

Deruelle et al. investigated the perception of French HCPs towards COVID-19 vaccination during pregnancy. The survey was performed between January 11<sup>th</sup> and March 1<sup>st</sup>, 2021. Overall, midwives were less likely to recommend COVID-19 vaccination during pregnancy (37.5%) compared to general practitioners (50.7%) and obstetricians (58.8%) (55).

Also, Bradfield et al. performed a survey in women (including pregnant and lactating women), midwives, doctors providing maternity care and midwifery students in Australia in early 2021 to investigate provider's perceptions on COVID-19 vaccination during pregnancy. They found that doctors and midwifery students were significantly more likely to advise COVID-19 vaccination during pregnancy compared to midwives. Of note, when looking at influential factors determining pregnant and lactating women's decision to be vaccinated, they did not ask whether a HCP recommendation was a motivational factor or not (56).

## 3. DETERMINANTS PREDICTING COVID-19 VACCINE ACCEPTANCE

Most of the surveys (N= 26) included in this review not only measured readiness to get vaccinated against COVID-19 during pregnancy or lactation, but also described determinants influencing COVID-19 vaccine acceptance.

### 3.1. *Factors influencing COVID-19 vaccine acceptance during pregnancy*

Important reasons to refuse COVID-19 vaccination during pregnancy are safety concerns, described in 19 studies (22,24–27,30–32,37–39,41–43,46–49,53). These safety concerns include possible harm for the baby and for the mother, both on short and long term. Other concerns mentioned were not enough clinical trial data on COVID-19 vaccination in pregnancy (22,24,27,31,32,46) and COVID-19 vaccines not being trustworthy because of rapid development and approval (22,24,30,39). Hosowaka et al. defined mistrust in the government as the only significant factor linked to vaccine hesitancy in pregnant women in Japan (39). Not believing in vaccines and in the existence of the SARS-CoV-2 virus, not being afraid of COVID-19 and trusting rumours on social media were also described by Citu et al. as statistically independent risk factors for vaccine hesitancy in pregnant women (35).

1  
2  
3 Positive determinants linked to acceptance of COVID-19 vaccination in pregnant women were  
4 receipt of an influenza vaccine (27,30,32,37,52) and/or pertussis vaccine during pregnancy  
5 (24,32), a HCP recommendation/discussion about COVID-19 vaccines (30,32,37,38,48,53), the  
6 believe of being at high risk of or concerns about contracting COVID-19 (22,29,32), awareness  
7 of being at increased risk of severe illness due to COVID-19 (53), and living with individuals  
8 with or suffering themselves from co-morbidities/high risk conditions (30).  
9  
10  
11  
12  
13  
14  
15

16 Demographic factors associated with better COVID-19 vaccine willingness are higher  
17 educational level (22,32,33,36,37,39,41,42,46,47,49,50,52), being employed (30,32,42,50),  
18 higher income (22,24,33,35,36,46,47), older age (22,24,25,32,33,37,41,46,49,52), being in the  
19 third trimester of gestation (26,36,38,49,52), multiparity (37,49) and living in an urban area  
20 (35,36,47,50). Also, race and ethnicity are demographic factors linked to COVID-19 vaccine  
21 willingness (24,29,30,41,43,50). Interestingly, Tao et al. found that Chinese pregnant women  
22 with younger age and lower education were more likely to accept COVID-19 vaccination (26).  
23  
24  
25  
26  
27  
28  
29

### 30 3.2. *Factors influencing COVID-19 vaccine acceptance during lactation*

31  
32 Similar safety concerns as in pregnant women are described in lactating women/postpartum  
33 women (27,31,32,45,49). Also, the lack of reliable data about COVID-19 vaccine  
34 administration and effectiveness during lactation is mentioned as reason to refuse the vaccine  
35 or to hesitate about getting it (31,45). Additionally, Sutton et al. described the concern a  
36 COVID-19 vaccine would cause infertility in this target group (27).  
37  
38  
39  
40

41 Gutierrez et al. and Stuckelberger et al. described demographic factors in pregnant and  
42 lactating/postpartum women associated with low vaccination likelihood: younger age (33,52),  
43 lower level of education (33,52) and lower income (33). However, they both did not  
44 distinguish pregnant and lactating/postpartum women (33,52). Riad et al. found that there  
45 was no significant difference in age and educational level in the lactating vaccine accepting  
46 group and vaccine resistant group. However, lactating healthcare workers had a significantly  
47 higher COVID-19 vaccine acceptance level compared to non-healthcare workers (49).  
48  
49  
50  
51  
52  
53  
54  
55  
56  
57  
58  
59  
60



#### 4. THE IMPACT OF THE COVID-19 PANDEMIC ON OTHER VACCINATIONS

Gencer et al. found that the 77.0% of the interrogated pregnant women had or intended to have a vaccine during pregnancy. In 50.6% of the women, the COVID-19 pandemic had not affected their views of being vaccinated in the future (57).

Saleh et al. evaluated the effect of the COVID-19 pandemic on seasonal influenza vaccine compliance among pregnant and postpartum women in Israel from September 2020 until Mid-January 2021. They found that, despite the high incidence of COVID-19, there was similar vaccine uptake as pre-pandemic with 54.4% of the women reported to be vaccinated against influenza (50).

Pisula et al. investigated the knowledge and attitudes towards influenza vaccination in pregnant women in 2021. In total, 21.0% had been vaccinated against influenza during pregnancy and 17.5% were planning to get vaccinated. They stated that there is a link between influenza and COVID-19 vaccine uptake in pregnant women. Women who refused COVID-19 vaccination were not intended to get an influenza vaccine and vice versa (47).

Skirrow et al. explored the experience of women getting vaccinated against pertussis during pregnancy in times of COVID-19. An online survey spread from the 3<sup>rd</sup> of August until 11<sup>th</sup> of October 2020 was completed by 922 pregnant women and 482 postpartum women who were pregnant at some point after the first lockdown in the United Kingdom. They found that 72.1% of pregnant women and 84.0% of postpartum women had received a pertussis vaccine during pregnancy even when access was hampered due to COVID-19 restrictions (58).

#### 5. THE IMPACT OF SOCIAL MEDIA ON COVID-19 VACCINE CONFIDENCE

Riad et al. stated that social media is an important source of information on COVID-19 vaccines in pregnant and lactating women. However, only 8.3% of the pregnant and lactating women reported media/social media as an impact factor for their decision towards COVID-19 vaccination (49).

Hahn et al. conducted three surveys in remote Alaskan communities, focusing on the impact of COVID-19 on daily life and attitude towards COVID-19 vaccination between November 2020 and September 2021. By September 2021, misunderstandings about vaccine recommendations during pregnancy and the effects of COVID-19 vaccination on fertility and

1  
2  
3 DNA were present where social media was identified as the primary source of information  
4  
5 (59).

6  
7 Maugeri et al. investigated the changes in Google Search interest on vaccination during  
8  
9 pregnancy after the introduction of COVID-19 vaccination in Italy via Google Trends. Data from  
10  
11 1 January 2019 to 31 October 2021 were searched. This way, monitoring the change from two  
12  
13 years before the introduction of COVID-19 vaccination until present (31 October 2021) was  
14  
15 possible. The analysis of Google Trends indicated that the search interest for 'Vaccination in  
16  
17 pregnancy' was significantly increased (both qualitative and quantitative) compared to the  
18  
19 predicted trend after the start of the Italian COVID-19 vaccination campaign. Moreover,  
20  
21 further qualitative analysis showed that the increase was most likely due to worries about  
22  
23 COVID-19 vaccination (60).

24  
25 Citu et al. identified trusting rumours on social media to have the greatest impact on vaccine  
26  
27 hesitancy in Romanian pregnant women. Significantly more pregnant women (78.1%)  
28  
29 answered "yes" to the question if they trust social media rumours compared to non-pregnant  
30  
31 women (63.0) (35). In a survey conducted a few months later, Citu et al. found that  
32  
33 unvaccinated pregnant women (44.7%) were still significantly more likely to select social  
34  
35 media as trustworthy decision factor compared to vaccinated pregnant women (25.0%) (36).  
36  
37 Marcell et al. set up a social media campaign in Washington called "One Vax Two Lives" to  
38  
39 encourage the spread of scientifically based information about the risks of COVID-19 and  
40  
41 benefits of COVID-19 vaccination during pregnancy. They reached a lot of people with ads on  
42  
43 Facebook and Instagram, but in contrast, visitors of their informative website remained rather  
44  
45 low. It is not clear what the actual impact of their campaign was on vaccine confidence and  
46  
47 uptake in pregnant women (61).  
48  
49  
50  
51  
52  
53  
54  
55  
56  
57  
58  
59  
60

## Discussion

Maternal vaccination already showed to be effective in preventing infectious disease-related morbidity and mortality in pregnant women, foetuses and infants. During the current COVID-19 pandemic, vaccination during pregnancy and lactation got a lot of attention. HCPs were one of the first priority groups for COVID-19 vaccination. Since a lot of these HCPs were of fertile age, pregnant and/or lactating, these women were in the beginning vaccinated against COVID-19 based on previous reassuring evidence on the use of inactivated vaccines during pregnancy/lactation. However, lack of robust safety, immunogenicity and efficacy data from COVID-19 vaccine trials and the existence of various recommendations about COVID-19 vaccination during pregnancy and lactation in different areas of the world were the start of an important debate on COVID-19 vaccination during pregnancy and lactation.

Already before the start of the COVID-19 pandemic, the World Health Organization (WHO) defined vaccine hesitancy as one of the top ten threats to global health (62). Therefore, insight in factors influencing willingness to get vaccinated are crucial to plan effective interventions to increase vaccine coverage, especially in high-risk groups, such as pregnant and lactating women. Surveys performed during the COVID-19 pandemic, both before and after licensure of COVID-19 vaccines, demonstrated that willingness to get vaccinated against COVID-19 during pregnancy or lactation is in general lower than in non-pregnant and non-nursing women, which is not new. The trend of hesitancy towards vaccination in pregnant and lactating women is already observed before on a global scale. Many studies in literature have reported low coverage rates for influenza and Tdap vaccines in pregnant and lactating women and also low vaccine confidence in this population. However, it seems that the overall reluctance to COVID-19 vaccination is even higher compared to other vaccines recommended to be administered during pregnancy and/or lactation. This is possibly caused by the belief that COVID-19 vaccines were tested and approved too quickly and that no data were collected in the initial pre-marketing trials in pregnant and lactating women.

1  
2  
3 Safety concerns are reported as the main reason for refusal of COVID-19 vaccination during  
4 pregnancy and lactation. The belief that COVID-19 vaccines could cause harm for the  
5 reproductive system, foetus/baby and/or for the women is the most cited driver for vaccine  
6 hesitancy. The presence of safety concerns as a barrier to get vaccinated during pregnancy is  
7 not a new observation. Before the COVID-19 pandemic, Wilson et al. already reported these  
8 concerns as the most frequently cited barrier for being vaccinated during pregnancy (63).

9  
10 Drivers for hesitancy towards COVID-19 vaccination in pregnant and lactating women are  
11 comparable to those in the general population where concerns about safety, efficacy and the  
12 quick development and approval of the vaccines are also the key determinants for COVID-19  
13 vaccine refusal (64). These observations highlight the importance of high-quality clinical trials  
14 including pregnant and lactating women and the clear and transparent communication of  
15 findings from these trials to all population groups to increase vaccine coverage rates.

16  
17 Before the start of the pandemic, Kilich et al. defined HCP recommendation as the most  
18 important factor to improve vaccine confidence during pregnancy (20). Also for COVID-19  
19 vaccination, HCP recommendation is identified as a valuable method to increase vaccine  
20 acceptance. Redmond et al. pinpointed a HCP recommendation as the most influential  
21 strategy increasing vaccine willingness (48). However, recommendations from HCP are still  
22 often overshadowed by anxiety for side effects and circulating messages on social media. Also,  
23 it is worrying that not all HCPs support COVID-19 vaccination during pregnancy. Especially  
24 midwives seem to be less confident to advise COVID-19 vaccination during pregnancy, a  
25 conclusion already made for other vaccines before the pandemic (65). Therefore, the access  
26 to tailored information on vaccination for HCPs is crucial. Moreover, proper education of HCPs  
27 concerning the effect and importance of vaccines during pregnancy and lactation should be  
28 encouraged.

29  
30 Besides clear formulation of vaccination recommendations during pregnancy/lactation, it is of  
31 equal importance that correct information on these recommendations reaches the target  
32 groups. In a survey in remote Alaskan communities, Hahn et al. found that 22.8% of the  
33 participants were not aware that COVID-19 vaccination was recommended during pregnancy,  
34 26.5% of them were unsure about a recommendation in pregnant women and 28.1% of the  
35 participants were uncertain if COVID-19 vaccination would affect fertility or not. Furthermore,

1  
2  
3 pregnancy and lactation were often cited by the participants as reasons to postpone COVID-  
4 19 vaccination (59). Additionally, in a questionnaire in Saudi Arabia about public knowledge  
5 towards COVID-19 vaccination, 46.2% of the males and 24.2% of the females did not know if  
6 COVID-19 vaccination was recommended for pregnant women or not. Also, 72.4% of the  
7 female participants assented that COVID-19 vaccination was not preferred during pregnancy  
8 (66).

9  
10 To avoid the misconceptions mentioned above and make sure target groups are aware of the  
11 most recent recommendations, specific programs and tools can be developed, adapted  
12 according to region, language and accessibility. Here, proper education of HCPs is again key to  
13 support these programs and tools and making these interventions effective.

14  
15 To inform women who are planning to be pregnant, pregnant and/or lactating about vaccine  
16 recommendations, social media platforms can be used. Social media has become an integral  
17 part of our life. It is an important source to gather information and to form an opinion about  
18 several topics including COVID-19 and COVID-19 vaccination. As Maugeri et al. showed in their  
19 research, Google Search interest for 'Vaccination in pregnancy' increased significantly with  
20 the start of the COVID-19 vaccination campaign in Italy (60), but further research still needs  
21 to be done to detect the relation between social media search and actual vaccine uptake  
22 during pregnancy or lactation.

23  
24 A six month follow-up study comparing COVID-19 vaccine hesitancy and actual vaccine uptake  
25 in pregnant and postpartum women concluded that the presence of vaccine hesitancy at  
26 baseline persisted, with only 10% of individuals transitioning from vaccine hesitant to being  
27 vaccinated (32). This highlights the need for the development of efficient interventions and  
28 educational strategies to increase vaccine confidence and subsequently vaccine coverage  
29 rates in pregnant and postpartum women. Therefore, at the University of Antwerp, a project  
30 was started funded by the Vaccine Confidence Fund to identify factors linked to social media  
31 that may influence vaccine confidence and in the long run uptake of pertussis, influenza and  
32 COVID-19 vaccines in women of childbearing age, pregnant and lactating women. The overall  
33 aim of this project, of which this review is also part of, is to identify the efficient interventions  
34 to increase vaccine confidence in pregnant and lactating women.

## Conclusion

Vaccine hesitancy during pregnancy and lactation remains an important topic to focus on, especially in times of a pandemic and fast development of new vaccines. To improve vaccine confidence in these target groups, the inclusion of pregnant and lactating women in clinical trials could reduce safety concerns, as this is identified as the main reason to refuse vaccination. In addition, proper education of HCPs and clear, universal recommendations can also contribute to increase vaccine willingness. Further research is necessary to define the role of social media in actual vaccine uptake. However, social media messages can influence vaccine confidence in pregnant and lactating women.

## Author's contribution

LDB and KM conducted the review. PVD, GH, KP, WD read the review and gave input and comments. All authors contributed to the article and approved the submitted version.

## Funding statement

This review was funded by a grant (VCF – 010) from The Vaccine Confidence Fund, a philanthropic and charitable fund of Global Impact.

## Competing interest

None declared

## Ethics approval statement

This study does not involve human participants.

## References

1. Jamieson DJ, Rasmussen SA. An update on COVID-19 and pregnancy. Vol. 226, *American Journal of Obstetrics and Gynecology*. Elsevier Inc.; 2022. p. 177–86.
2. Omer SB, Bednarczyk RA, Madhi SA, Klugman KP. Benefits to mother and child of influenza vaccination during pregnancy. Vol. 8, *Human Vaccines and Immunotherapeutics*. 2012. p. 130–7.
3. Kandeil W, van den Ende C, Bunge EM, Jenkins VA, Ceregido MA, Guignard A. A systematic review of the burden of pertussis disease in infants and the effectiveness of maternal immunization against pertussis. Vol. 19, *Expert Review of Vaccines*. Taylor and Francis Ltd.; 2020. p. 621–38.
4. Mertz D, Geraci J, Winkup J, Gessner BD, Ortiz JR, Loeb M. Pregnancy as a risk factor for severe outcomes from influenza virus infection: A systematic review and meta-analysis of observational studies. Vol. 35, *Vaccine*. Elsevier Ltd; 2017. p. 521–8.
5. WHO. WHO recommendation pertussis [Internet]. [cited 2022 Apr 4]. Available from: [https://www.who.int/health-topics/pertussis#tab=tab\\_2](https://www.who.int/health-topics/pertussis#tab=tab_2)
6. Masseria C, Martin CK, Krishnarajah G, Becker LK, Buikema A, Tan TQ. Incidence and burden of pertussis among infants less than 1 year of age. *Pediatric Infectious Disease Journal*. 2017;36(3):e54–61.
7. Allotey J, Stallings E, Bonet M, Yap M, Chatterjee S, Kew T, et al. Clinical manifestations, risk factors, and maternal and perinatal outcomes of coronavirus disease 2019 in pregnancy: Living systematic review and meta-analysis. *The BMJ*. 2020 Sep 1;370.
8. Lokken EM, Huebner EM, Taylor GG, Hendrickson S, Vanderhoeven J, Kachikis A, et al. Disease severity, pregnancy outcomes, and maternal deaths among pregnant patients with severe acute respiratory syndrome coronavirus 2 infection in Washington State. *American Journal of Obstetrics and Gynecology*. 2021 Jul 1;225(1):77.e1-77.e14.
9. Wei SQ, Bilodeau-Bertrand M, Liu S, Auger N. The impact of COVID-19 on pregnancy outcomes: A systematic review and meta-analysis. Vol. 193, *CMAJ*. Canadian Medical Association; 2021. p. E540–8.

- 1  
2  
3 10. Smith V, Seo D, Warty R, Payne O, Salih M, Chin KL, et al. Maternal and neonatal  
4 outcomes associated with COVID-19 infection: A systematic review. PLoS ONE. 2020  
5 Jun 1;15(6).  
6  
7
- 8  
9 11. Cui X, Zhao Z, Zhang T, Guo W, Guo W, Zheng J, et al. A systematic review and  
10 meta-analysis of children with coronavirus disease 2019 (COVID-19). Journal of  
11 Medical Virology [Internet]. 2021 Feb 28;93(2):1057–69. Available from:  
12 <https://onlinelibrary.wiley.com/doi/10.1002/jmv.26398>  
13  
14
- 15  
16 12. Sebghati M, Khalil A. Uptake of vaccination in pregnancy. Vol. 76, Best Practice and  
17 Research: Clinical Obstetrics and Gynaecology. Bailliere Tindall Ltd; 2021. p. 53–65.  
18
- 19  
20 13. Maltezou HC, Effraimidou E, Cassimos DC, Medic S, Topalidou M, Konstantinidis T, et  
21 al. Vaccination programs for pregnant women in Europe, 2021. Vaccine. 2021 Oct  
22 1;39(41):6137–43.  
23  
24
- 25  
26 14. WHO. WHO recommendation COVID-19 [Internet]. [cited 2022 Jul 15]. Available from:  
27 [https://www.who.int/emergencies/diseases/novel-coronavirus-2019/covid-19-](https://www.who.int/emergencies/diseases/novel-coronavirus-2019/covid-19-vaccines/advice)  
28 [vaccines/advice](https://www.who.int/emergencies/diseases/novel-coronavirus-2019/covid-19-vaccines/advice)  
29
- 30  
31 15. WHO. WHO recommendation influenza [Internet]. [cited 2022 Jul 15]. Available from:  
32 <https://www.who.int/teams/global-influenza-programme/vaccines/vaccine-use>  
33  
34
- 35  
36 16. Lajos GJ, Fialho SCAV, Kfoury RDÁ, Robial R, Roteli-Martins CM. Vaccination in  
37 pregnant and postpartum women. Revista Brasileira de Ginecologia e Obstetricia.  
38 2020 Dec 1;42(12):851–5.  
39
- 40  
41 17. Luxi N, Giovanazzi A, Capuano A, Crisafulli S, Cutroneo PM, Fantini MP, et al. COVID-19  
42 Vaccination in Pregnancy, Paediatrics, Immunocompromised Patients, and Persons  
43 with History of Allergy or Prior SARS-CoV-2 Infection: Overview of Current  
44 Recommendations and Pre- and Post-Marketing Evidence for Vaccine Efficacy and  
45 Safety. Vol. 44, Drug Safety. Adis; 2021. p. 1247–69.  
46  
47
- 48  
49 18. Giles ML, Gunatilaka A, Palmer K, Sharma K, Roach V. Alignment of national COVID-19  
50 vaccine recommendations for pregnant and lactating women. Bull World Health  
51 Organ. 2021 Oct 1;99(10):739–46.  
52  
53
- 54  
55 19. Drezner D, Youngster M, Klainer H, Youngster I. Maternal vaccinations coverage and  
56 reasons for non-compliance - A cross-sectional observational study. BMC Pregnancy  
57 and Childbirth. 2020 Sep 16;20(1).  
58  
59  
60



- 1  
2  
3 20. Kilich E, Dada S, Francis MR, Tazare J, Chico RM, Paterson P, et al. Factors that  
4 influence vaccination decision making among pregnant women: A systematic review  
5 and meta-analysis. *PLoS ONE*. 2020 Jul 1;15(7 July 2020).  
6  
7  
8 21. Ceulemans M, Foulon V, Panchaud A, Winterfeld U, Pomar L, Lambelet V, et al.  
9 Vaccine willingness and impact of the covid-19 pandemic on women's perinatal  
10 experiences and practices—a multinational, cross-sectional study covering the first  
11 wave of the pandemic. *International Journal of Environmental Research and Public*  
12 *Health*. 2021 Apr 1;18(7).  
13  
14  
15 22. Skjefte M, Ngirbabul M, Akeju O, Escudero D, Hernandez-Diaz S, Wyszynski DF, et al.  
16 COVID-19 vaccine acceptance among pregnant women and mothers of young  
17 children: results of a survey in 16 countries. *European Journal of Epidemiology*. 2021  
18 Feb 1;36(2):197–211.  
19  
20  
21 23. Stuckelberger S, Favre G, Ceulemans M, Nordeng H, Gerbier E, Lambelet V, et al. Sars-  
22 cov-2 vaccine willingness among pregnant and breastfeeding women during the first  
23 pandemic wave: A cross-sectional study in Switzerland. *Viruses*. 2021 Jul 1;13(7).  
24  
25  
26 24. Skirrow H, Barnett S, Bell S, Riaposova L, Mounier-Jack S, Kampmann B, et al.  
27 Women's views on accepting COVID-19 vaccination during and after pregnancy, and  
28 for their babies: a multi-methods study in the UK. *BMC Pregnancy and Childbirth*  
29 [Internet]. 2022 Dec 14;22(1):33. Available from:  
30 [https://bmcpregnancychildbirth.biomedcentral.com/articles/10.1186/s12884-021-](https://bmcpregnancychildbirth.biomedcentral.com/articles/10.1186/s12884-021-04321-3)  
31 [04321-3](https://bmcpregnancychildbirth.biomedcentral.com/articles/10.1186/s12884-021-04321-3)  
32  
33 25. Erchick DJ, Agarwal S, Kaysin A, Gibson DG, Labrique AB. Changes in prenatal care and  
34 vaccine willingness among pregnant women during the COVID-19 pandemic. *BMC*  
35 *Pregnancy and Childbirth* [Internet]. 2022 Dec 13;22(1):558. Available from:  
36 [https://bmcpregnancychildbirth.biomedcentral.com/articles/10.1186/s12884-022-](https://bmcpregnancychildbirth.biomedcentral.com/articles/10.1186/s12884-022-04882-x)  
37 [04882-x](https://bmcpregnancychildbirth.biomedcentral.com/articles/10.1186/s12884-022-04882-x)  
38  
39  
40 26. Tao L, Wang R, Han N, Liu J, Yuan C, Deng L, et al. Acceptance of a COVID-19 vaccine  
41 and associated factors among pregnant women in China: a multi-center cross-  
42 sectional study based on health belief model. *Human Vaccines and*  
43 *Immunotherapeutics*. 2021;17(8):2378–88.  
44  
45  
46  
47  
48  
49  
50  
51  
52  
53  
54  
55  
56  
57  
58  
59  
60

- 1
  - 2
  - 3
  - 4
  - 5
  - 6
  - 7
  - 8
  - 9
  - 10
  - 11
  - 12
  - 13
  - 14
  - 15
  - 16
  - 17
  - 18
  - 19
  - 20
  - 21
  - 22
  - 23
  - 24
  - 25
  - 26
  - 27
  - 28
  - 29
  - 30
  - 31
  - 32
  - 33
  - 34
  - 35
  - 36
  - 37
  - 38
  - 39
  - 40
  - 41
  - 42
  - 43
  - 44
  - 45
  - 46
  - 47
  - 48
  - 49
  - 50
  - 51
  - 52
  - 53
  - 54
  - 55
  - 56
  - 57
  - 58
  - 59
  - 60
27. Sutton D, D'Alton M, Zhang Y, Kahe K, Cepin A, Goffman D, et al. COVID-19 vaccine acceptance among pregnant, breastfeeding, and nonpregnant reproductive-aged women. *American Journal of Obstetrics and Gynecology MFM*. 2021 Sep 1;3(5).
28. Samannodi M. COVID-19 vaccine acceptability among women who are pregnant or planning for pregnancy in Saudi Arabia: A cross-sectional study. *Patient Preference and Adherence*. 2021;15:2609–18.
29. Perez MJ, Paul R, Raghuraman N, Carter EB, Odibo AO, Kelly JC, et al. Characterizing initial COVID-19 vaccine attitudes among pregnancy-capable healthcare workers. *American Journal of Obstetrics & Gynecology MFM* [Internet]. 2022 Mar;4(2):100557. Available from: <https://linkinghub.elsevier.com/retrieve/pii/S2589933321002536>
30. Razzaghi H, Kahn KE, Masalovich S, Black CL, Nguyen KH, Barfield WD, et al. COVID-19 Vaccination and Intent Among Pregnant Women, United States, April 2021. *Public Health Reports* [Internet]. 2022 Jun 14;003335492210992. Available from: <http://journals.sagepub.com/doi/10.1177/00333549221099244>
31. Schaal NK, Zöllkau J, Hepp P, Fehm T, Hagenbeck C. Pregnant and breastfeeding women's attitudes and fears regarding the COVID-19 vaccination. *Archives of Gynecology and Obstetrics*. 2021;
32. Germann K, Kiefer MK, Rood KM, Mehl R, Wu J, Pandit R, et al. Association of initial <sc>COVID</sc>-19 vaccine hesitancy with subsequent vaccination among pregnant and postpartum individuals. *BJOG: An International Journal of Obstetrics & Gynaecology* [Internet]. 2022 Jul 19;129(8):1352–60. Available from: <https://onlinelibrary.wiley.com/doi/10.1111/1471-0528.17189>
33. Gutierrez S, Logan R, Marshall C, Kerns J, Diamond-Smith N. Predictors of COVID-19 Vaccination Likelihood Among Reproductive-Aged Women in the United States. *Public Health Reports* [Internet]. 2022 May 3;137(3):588–96. Available from: <http://journals.sagepub.com/doi/10.1177/00333549221081123>
34. Abuhammad S. Attitude of pregnant and lactating women toward COVID-19 vaccination in Jordan: a cross-sectional study. *Journal of Perinatal Medicine* [Internet]. 2022 May 3;0(0). Available from: <https://www.degruyter.com/document/doi/10.1515/jpm-2022-0026/html>
35. Citu IM, Citu C, Gorun F, Motoc A, Gorun OM, Burlea B, et al. Determinants of COVID-19 Vaccination Hesitancy among Romanian Pregnant Women. *Vaccines (Basel)*

- 1  
2  
3 [Internet]. 2022 Feb 10;10(2):275. Available from: <https://www.mdpi.com/2076-393X/10/2/275>
- 4  
5  
6  
7 36. Citu C, Chiriac VD, Citu IM, Gorun OM, Burlea B, Bratosin F, et al. Appraisal of COVID-  
8 19 Vaccination Acceptance in the Romanian Pregnant Population. *Vaccines (Basel)*  
9 [Internet]. 2022 Jun 15;10(6):952. Available from: <https://www.mdpi.com/2076-393X/10/6/952>
- 10  
11  
12  
13  
14 37. Egloff C, Couffignal C, Cordier AG, Deruelle P, Sibiude J, Anselem O, et al. Pregnant  
15 women's perceptions of the COVID-19 vaccine: A French survey. Brownie SM, editor.  
16 *PLOS ONE* [Internet]. 2022 Feb 7;17(2):e0263512. Available from:  
17 <https://dx.plos.org/10.1371/journal.pone.0263512>
- 18  
19  
20  
21  
22 38. Geoghegan S, Stephens LC, Feemster KA, Drew RJ, Eogan M, Butler KM. "This choice  
23 does not just affect me." Attitudes of pregnant women toward COVID-19 vaccines: a  
24 mixed-methods study. *Human Vaccines and Immunotherapeutics*. 2021;17(10):3371–  
25 6.
- 26  
27  
28  
29 39. Hosokawa Y, Okawa S, Hori A, Morisaki N, Takahashi Y, Fujiwara T, et al. The  
30 Prevalence of COVID-19 Vaccination and Vaccine Hesitancy in Pregnant Women: An  
31 Internet-based Cross-sectional Study in Japan. *Journal of Epidemiology* [Internet].  
32 2022 Apr 5;32(4):JE20210458. Available from:  
33 [https://www.jstage.jst.go.jp/article/jea/32/4/32\\_JE20210458/\\_article](https://www.jstage.jst.go.jp/article/jea/32/4/32_JE20210458/_article)
- 34  
35  
36  
37  
38 40. Kuciel N, Mazurek J, Hap K, Marciniak D, Biernat K, Sutkowska E. COVID-19 Vaccine  
39 Acceptance in Pregnant and Lactating Women and Mothers of Young Children in  
40 Poland. *International Journal of Women's Health* [Internet]. 2022 Mar;Volume  
41 14:415–24. Available from: <https://www.dovepress.com/covid-19-vaccine-acceptance-in-pregnant-and-lactating-women-and-mother-peer-reviewed-fulltext-article-IJWH>
- 42  
43  
44  
45  
46  
47  
48  
49 41. Levy et al. Acceptance of COVID-19 vaccination in pregnancy: a survey study.
- 50  
51 42. Mappa I, Luviso M, Distefano FA, Carbone L, Maruotti GM, Rizzo G. Women  
52 perception of SARS-CoV-2 vaccination during pregnancy and subsequent maternal  
53 anxiety: a prospective observational study. *Journal of Maternal-Fetal and Neonatal*  
54 *Medicine*. 2021;
- 55  
56  
57  
58  
59  
60

- 1  
2  
3 43. Mohan S, Reagu S, Lindow S, Alabdulla M. COVID-19 vaccine hesitancy in perinatal  
4 women: A cross sectional survey. *Journal of Perinatal Medicine*. 2021 Jul 1;49(6):678–  
5 85.  
6  
7  
8 44. Nguyen LH, Hoang MT, Nguyen LD, Ninh LT, Nguyen HTT, Nguyen AD, et al.  
9 Acceptance and willingness to pay for COVID-19 vaccines among pregnant women in  
10 Vietnam. *Tropical Medicine and International Health*. 2021 Oct 1;26(10):1303–13.  
11  
12 45. Oluklu D, Goncu Ayhan S, Menekse Beser D, Uyan Hendem D, Ozden Tokalioglu E,  
13 Turgut E, et al. Factors affecting the acceptability of COVID-19 vaccine in the  
14 postpartum period. *Human Vaccines and Immunotherapeutics*. 2021;17(11):4043–7.  
15  
16 46. Perrotta K, Messer A, Alvarado S, Gaudette M, Tran C, Bandoli G. <sc>COVID</sc>  
17 -19 vaccine hesitancy and acceptance among pregnant people contacting a teratogen  
18 information service. *Journal of Genetic Counseling* [Internet]. 2022 Jun 28; Available  
19 from: <https://onlinelibrary.wiley.com/doi/10.1002/jgc4.1608>  
20  
21 47. Pisula A, Sienicka A, Pawlik KK, Dobrowolska-Redo A, Kacperczyk-Bartnik J, Romejko-  
22 Wolniewicz E. Pregnant Women’s Knowledge of and Attitudes towards Influenza  
23 Vaccination during the COVID-19 Pandemic in Poland. *International Journal of*  
24 *Environmental Research and Public Health* [Internet]. 2022 Apr 8;19(8):4504.  
25 Available from: <https://www.mdpi.com/1660-4601/19/8/4504>  
26  
27 48. Redmond ML, Mayes P, Morris K, Ramaswamy M, Ault KA, Smith SA. Learning from  
28 maternal voices on COVID-19 vaccine uptake: Perspectives from pregnant women  
29 living in the Midwest on the COVID-19 pandemic and vaccine. *Journal of Community*  
30 *Psychology* [Internet]. 2022 Aug 13;50(6):2630–43. Available from:  
31 <https://onlinelibrary.wiley.com/doi/10.1002/jcop.22851>  
32  
33 49. Riad A, Jozzová A, Üstün B, Lagová E, Hruban L, Janků P, et al. COVID-19 Vaccine  
34 Acceptance of Pregnant and Lactating Women (PLW) in Czechia: An Analytical Cross-  
35 Sectional Study. *International Journal of Environmental Research and Public Health*  
36 [Internet]. 2021 Dec 19;18(24):13373. Available from: <https://www.mdpi.com/1660-4601/18/24/13373>  
37  
38 50. Saleh OA, Halperin O. Influenza virus vaccine compliance among pregnant women  
39 during the COVID-19 pandemic (pre-vaccine era) in Israel and future intention to  
40 uptake BNT162b2 mRNA COVID-19 vaccine. *Vaccine* [Internet]. 2022  
41  
42  
43  
44  
45  
46  
47  
48  
49  
50  
51  
52  
53  
54  
55  
56  
57  
58  
59  
60

- 1  
2  
3 Mar;40(13):2099–106. Available from:  
4  
5 <https://linkinghub.elsevier.com/retrieve/pii/S0264410X22001608>  
6
- 7 51. Samannodi M. COVID-19 vaccine acceptability among women who are pregnant or  
8 planning for pregnancy in Saudi Arabia: A cross-sectional study. *Patient Preference*  
9 *and Adherence*. 2021;15:2609–18.  
10  
11
- 12 52. Stuckelberger S, Favre G, Ceulemans M, Nordeng H, Gerbier E, Lambelet V, et al. Sars-  
13 cov-2 vaccine willingness among pregnant and breastfeeding women during the first  
14 pandemic wave: A cross-sectional study in Switzerland. *Viruses*. 2021 Jul 1;13(7).  
15  
16
- 17 53. Ward C, Megaw L, White S, Bradfield Z. COVID-19 vaccination rates in an antenatal  
18 population: A survey of women’s perceptions, factors influencing vaccine uptake and  
19 potential contributors to vaccine hesitancy. *Australian and New Zealand Journal of*  
20 *Obstetrics and Gynaecology* [Internet]. 2022 Apr 22; Available from:  
21 <https://onlinelibrary.wiley.com/doi/10.1111/ajo.13532>  
22  
23  
24  
25
- 26 54. Waring ME, Pagoto SL, Rudin LR, Ho C, Horkachuck A, Kapoor IA, et al. Factors  
27 associated with mothers’ hesitancy to receive a COVID-19 vaccine. *Journal of*  
28 *Behavioral Medicine* [Internet]. 2022 Jan 4; Available from:  
29 <https://link.springer.com/10.1007/s10865-021-00268-0>  
30  
31  
32  
33
- 34 55. Deruelle P, Couffignal C, Sibiude J, Vivanti AJ, Anselem O, Luton D, et al. Prenatal care  
35 providers’ perceptions of the SARS-Cov-2 vaccine for themselves and for pregnant  
36 women. *PLoS ONE*. 2021 Sep 1;16(9 September).  
37  
38  
39
- 40 56. Bradfield Z, Wynter K, Hauck Y, Sweet L, Wilson AN, Szabo RA, et al. COVID-19  
41 vaccination perceptions and intentions of maternity care consumers and providers in  
42 Australia. Xie L, editor. *PLOS ONE* [Internet]. 2021 Nov 15;16(11):e0260049. Available  
43 from: <https://dx.plos.org/10.1371/journal.pone.0260049>  
44  
45  
46
- 47 57. Gencer H, Özkan S, Vardar O, Serçekuş P. The effects of the COVID 19 pandemic on  
48 vaccine decisions in pregnant women. *Women and Birth*. 2021;  
49  
50
- 51 58. Skirrow H, Barnett S, Bell S, Mounier-Jack S, Kampmann B, Holder B. Women’s views  
52 and experiences of accessing pertussis vaccination in pregnancy and infant  
53 vaccinations during the COVID-19 pandemic: A multi-methods study in the UK.  
54 *Vaccine* [Internet]. 2022 Jul; Available from:  
55 <https://linkinghub.elsevier.com/retrieve/pii/S0264410X22008453>  
56  
57  
58  
59  
60

- 1  
2  
3 59. Hahn MB, Fried RL, Cochran P, Eichelberger LP. Evolving perceptions of COVID-19  
4 vaccines among remote Alaskan communities. *International Journal of Circumpolar*  
5 *Health* [Internet]. 2022 Dec 31;81(1). Available from:  
6  
7 <https://www.tandfonline.com/doi/full/10.1080/22423982.2021.2021684>  
8  
9  
10 60. Maugeri A, Barchitta M, Agodi A. Using Google Trends to Predict COVID-19  
11 Vaccinations and Monitor Search Behaviours about Vaccines: A Retrospective Analysis  
12 of Italian Data. *Vaccines (Basel)* [Internet]. 2022 Jan 14;10(1):119. Available from:  
13  
14 <https://www.mdpi.com/2076-393X/10/1/119>  
15  
16  
17 61. Marcell L, Dokania E, Navia I, Baxter C, Crary I, Rutz S, et al. One Vax Two Lives: A  
18 Social Media Campaign and Research Program to Address COVID-19 Vaccine  
19 Hesitancy in Pregnancy. *American Journal of Obstetrics and Gynecology* [Internet].  
20  
21 2022 Jun; Available from:  
22  
23 <https://linkinghub.elsevier.com/retrieve/pii/S0002937822004768>  
24  
25  
26 62. WHO. WHO ten threats for global health [Internet]. [cited 2022 Jul 15]. Available  
27 from: [https://www.who.int/news-room/spotlight/ten-threats-to-global-health-in-](https://www.who.int/news-room/spotlight/ten-threats-to-global-health-in-2019)  
28  
29 2019  
30  
31  
32 63. Wilson RJ, Paterson P, Jarrett C, Larson HJ. Understanding factors influencing  
33 vaccination acceptance during pregnancy globally: A literature review. *Vaccine*. 2015  
34 Nov;33(47):6420–9.  
35  
36  
37 64. Troiano G, Nardi A. Vaccine hesitancy in the era of COVID-19. *Public Health*. 2021  
38 May;194:245–51.  
39  
40  
41 65. Dubé E, Gagnon D, Kaminsky K, Green CR, Ouakki M, Bettinger JA, et al. Vaccination  
42 during pregnancy: Canadian maternity care providers' opinions and practices. *Human*  
43 *Vaccines and Immunotherapeutics*. 2020;16(11):2789–99.  
44  
45  
46 66. Al-Zalfawi SM, Rabbani SI, Asdaq SMB, Alamri AS, Alsanie WF, Alhomrani M, et al.  
47 Public knowledge, attitude, and perception towards COVID-19 vaccination in Saudi  
48 Arabia. *International Journal of Environmental Research and Public Health*. 2021 Oct  
49 1;18(19).  
50  
51  
52  
53  
54  
55  
56  
57  
58  
59  
60

# BMJ Open

## The influence of the COVID-19 pandemic and social media on the behaviour of pregnant and lactating women towards vaccination: a scoping review

|                                 |                                                                                                                                                                                                                                                                                                                                                                                                                                                                                                                                                                                                                                                                                                                                                                                                                                                                                                    |
|---------------------------------|----------------------------------------------------------------------------------------------------------------------------------------------------------------------------------------------------------------------------------------------------------------------------------------------------------------------------------------------------------------------------------------------------------------------------------------------------------------------------------------------------------------------------------------------------------------------------------------------------------------------------------------------------------------------------------------------------------------------------------------------------------------------------------------------------------------------------------------------------------------------------------------------------|
| Journal:                        | <i>BMJ Open</i>                                                                                                                                                                                                                                                                                                                                                                                                                                                                                                                                                                                                                                                                                                                                                                                                                                                                                    |
| Manuscript ID                   | bmjopen-2022-066367.R1                                                                                                                                                                                                                                                                                                                                                                                                                                                                                                                                                                                                                                                                                                                                                                                                                                                                             |
| Article Type:                   | Original research                                                                                                                                                                                                                                                                                                                                                                                                                                                                                                                                                                                                                                                                                                                                                                                                                                                                                  |
| Date Submitted by the Author:   | 23-Dec-2022                                                                                                                                                                                                                                                                                                                                                                                                                                                                                                                                                                                                                                                                                                                                                                                                                                                                                        |
| Complete List of Authors:       | De Brabandere, Larissa; University of Antwerp Faculty of Medicine and Health Sciences, Centre for the Evaluation of Vaccination, Vaccine & Infectious Diseases Institute<br>Hendrickx, Greet; University of Antwerp Faculty of Medicine and Health Sciences, Centre for the Evaluation of Vaccination, Vaccine & Infectious Diseases Institute<br>Poels, Karolien; University of Antwerp, Media, ICT & Organizations and Society, Department of Communication Sciences<br>Daelemans, Walter; University of Antwerp, CLiPS, Department of Linguistics<br>Van Damme, Pierre; University of Antwerp Faculty of Medicine and Health Sciences, Centre for the Evaluation of Vaccination, Vaccine & Infectious Diseases Institute<br>Maertens, Kirsten; University of Antwerp Faculty of Medicine and Health Sciences, Centre for the Evaluation of Vaccination, Vaccine & Infectious Diseases Institute |
| <b>Primary Subject Heading</b>: | Public health                                                                                                                                                                                                                                                                                                                                                                                                                                                                                                                                                                                                                                                                                                                                                                                                                                                                                      |
| Secondary Subject Heading:      | Infectious diseases, Obstetrics and gynaecology                                                                                                                                                                                                                                                                                                                                                                                                                                                                                                                                                                                                                                                                                                                                                                                                                                                    |
| Keywords:                       | COVID-19, Public health < INFECTIOUS DISEASES, PREVENTIVE MEDICINE                                                                                                                                                                                                                                                                                                                                                                                                                                                                                                                                                                                                                                                                                                                                                                                                                                 |
|                                 |                                                                                                                                                                                                                                                                                                                                                                                                                                                                                                                                                                                                                                                                                                                                                                                                                                                                                                    |

SCHOLARONE™  
Manuscripts



I, the Submitting Author has the right to grant and does grant on behalf of all authors of the Work (as defined in the below author licence), an exclusive licence and/or a non-exclusive licence for contributions from authors who are: i) UK Crown employees; ii) where BMJ has agreed a CC-BY licence shall apply, and/or iii) in accordance with the terms applicable for US Federal Government officers or employees acting as part of their official duties; on a worldwide, perpetual, irrevocable, royalty-free basis to BMJ Publishing Group Ltd ("BMJ") its licensees and where the relevant Journal is co-owned by BMJ to the co-owners of the Journal, to publish the Work in this journal and any other BMJ products and to exploit all rights, as set out in our [licence](#).

The Submitting Author accepts and understands that any supply made under these terms is made by BMJ to the Submitting Author unless you are acting as an employee on behalf of your employer or a postgraduate student of an affiliated institution which is paying any applicable article publishing charge ("APC") for Open Access articles. Where the Submitting Author wishes to make the Work available on an Open Access basis (and intends to pay the relevant APC), the terms of reuse of such Open Access shall be governed by a Creative Commons licence – details of these licences and which [Creative Commons](#) licence will apply to this Work are set out in our licence referred to above.

Other than as permitted in any relevant BMJ Author's Self Archiving Policies, I confirm this Work has not been accepted for publication elsewhere, is not being considered for publication elsewhere and does not duplicate material already published. I confirm all authors consent to publication of this Work and authorise the granting of this licence.



1  
2  
3 **The influence of the COVID-19 pandemic and social media on the**  
4 **behaviour of pregnant and lactating women towards vaccination: a**  
5 **scoping review**  
6  
7  
8  
9

10 Larissa De Brabandere<sup>1</sup>, Greet Hendrickx<sup>1</sup>, Karolien Poels<sup>2</sup>, Walter Daelemans<sup>3</sup>, Pierre Van  
11  
12 Damme<sup>1</sup>, Kirsten Maertens<sup>1</sup>  
13  
14  
15  
16

17 <sup>1</sup> Centre for the Evaluation of Vaccination, Vaccine & Infectious Diseases Institute, University of  
18 Antwerp, Antwerp, Belgium  
19

20 <sup>2</sup> Media, ICT & Organizations and Society, Department of Communication Studies, University of  
21 Antwerp, Antwerp, Belgium  
22  
23

24 <sup>3</sup> CLiPS, Department for Linguistics, University of Antwerp, Antwerp, Belgium  
25  
26  
27  
28  
29  
30

31 Corresponding author:

32  
33 Kirsten Maertens, PhD, Prof

34  
35 Centre for the Evaluation of Vaccination, Vaccine & Infectious Diseases Institute, University of  
36 Antwerp, Belgium  
37

38  
39 Mail: [kirsten.maertens@uantwerpen.be](mailto:kirsten.maertens@uantwerpen.be)  
40

41  
42 Alternate corresponding author:  
43

44 Larissa De Brabandere, MD

45  
46 Centre for the Evaluation of Vaccination, Vaccine & Infectious Diseases Institute, University of  
47 Antwerp, Belgium  
48

49  
50 Mail: [larissa.debrabandere@uantwerpen.be](mailto:larissa.debrabandere@uantwerpen.be)  
51  
52  
53  
54

55 Abstract : 298 words

56  
57 Article : 4,120 words

58  
59  
60 References : 66

## Abstract

**BACKGROUND** Pregnant women, foetuses and infants are at risk of infectious disease-related complications. Maternal vaccination is a strategy developed to better protect pregnant women and their offspring against infectious disease-related morbidity and mortality. Vaccines against influenza, pertussis and recently also COVID-19 are widely recommended for pregnant women. Yet, there is still a significant amount of hesitation towards maternal vaccination policies. Furthermore, contradictory messages circulating social media impact vaccine confidence.

**OBJECTIVES** This scoping review aims to reveal how COVID-19 and COVID-19 vaccination impacted vaccine confidence in pregnant and lactating women. Additionally, this review studied the role social media plays in creating opinions towards vaccination in these target groups.

**ELIGIBILITY CRITERIA** Articles published between 23 November 2018 and 18 July 2022 that are linked to the objectives of this review were included. Reviews, articles not focusing on the target group, abstracts, articles describing outcomes of COVID-19 infection/COVID-19 vaccination were excluded.

**SOURCES OF EVIDENCE** the PubMed database was searched to select articles. Search terms used were linked to pregnancy, lactation, vaccination, vaccine hesitancy, COVID-19 and social media.

**CHARTING METHODS** Included articles were abstracted and synthesized by one reviewer. Verification was done by a second reviewer. Disagreements were addressed through discussion between reviewers and other researchers.

**RESULTS** Pregnant and lactating women are generally less likely to accept a COVID-19 vaccine compared to non-pregnant and non-nursing women. The main reason to refuse maternal vaccination is safety concerns. A positive link was detected between COVID-19 vaccine willingness and acceptance of other vaccines during pregnancy. The Internet and social media are identified as important information sources for maternal vaccination.

**DISCUSSION & CONCLUSION** Vaccine hesitancy in pregnant and lactating women remains an important issue, expressing the need for effective interventions to increase vaccine confidence and coverage. The role social media plays in vaccine uptake remains unclear.

### Strengths and limitations

- A concrete research question with targeted search terms was used to complete this review.
- The search was only limited to one database (PubMed) which can lead to a lack of certain information.
- The search was not systematic since timing to perform the review was limited (within the VCF project). Nevertheless, this scoping review, conducted following the PRISMA guidelines, gives a good impression of what is already known and what not about the influence of COVID-19 and social media on vaccine confidence in pregnant and lactating women. Further research and interventions can be set up based on this review.

## Introduction

Several infectious diseases are associated with adverse outcomes in pregnant women, foetuses and infants. Therefore, a strategy which has gained interest in recent years is vaccination during pregnancy as well as during lactation, as a means to reduce infectious disease-related morbidity and mortality in these target populations (1–3).

Pregnant women who contract influenza have an increased risk of influenza-related complications and hospitalisation compared to non-pregnant women (2,4). In addition, influenza infections during pregnancy are linked to an increased risk of preterm delivery and small-for-gestational-age infants. Infants younger than six months of age are at high risk of having severe influenza-related complications, often associated with hospitalisation and mortality (2).

Another infectious disease that forms a serious threat for neonates is pertussis, of which the disease burden and case fatality rate is highest in the first year of life (5,6).

A COVID-19 infection during pregnancy is linked to an increased risk of hospitalisation, admission to an intensive care unit and death in pregnant women (7,8). Several studies have also found that there is a higher risk of preterm delivery, stillbirth and pre-eclampsia (7,9,10). Furthermore, low birth weight, foetal distress and other respiratory symptoms are more frequent in neonates born to a mother who experienced a COVID-19 infection (7,10). Infants infected with COVID-19 in the postpartum period can become critically ill (11).

To better protect pregnant women, foetuses and infants against infectious disease-related complications, vaccination during pregnancy is an important strategy. Public health authorities worldwide have already implemented this approach for influenza and pertussis, while recently also adding vaccination against COVID-19 (5,12–15).

Vaccination during pregnancy induces vaccine-specific antibodies that protect pregnant women against severe illness. Subsequently, these vaccine-induced antibodies are transferred from mother to baby across the placenta during pregnancy and via breastfeeding after birth (12). Therefore, if women did not receive a pertussis and/or influenza vaccine during pregnancy or are not yet fully vaccinated against COVID-19 with the advised vaccine doses, it is recommended to vaccinate in the postpartum period (16,17).

1  
2  
3 Despite the proven benefits of vaccination during pregnancy and lactation and the  
4 implementation of the vaccination strategy on a broad scale, there is still a significant amount  
5 of hesitation towards maternal vaccination policies. This is reflected by poor vaccine uptake  
6 in different regions and varying or lacking maternal vaccination programmes and  
7 recommendations in various countries (12,13,18,19). Before the start of the COVID-19  
8 pandemic, Kilich et al. published a systematic review which defined factors that could possibly  
9 influence vaccination decision-making among pregnant women. The most important factor  
10 was found to be the recommendation from a healthcare provider (HCP) to vaccinate during  
11 pregnancy. However, other determinants such as previous vaccination behaviour and vaccine-  
12 specific factors could negate the recommendation from a HCP. Kilich et al. also found that  
13 pregnant women used the Internet or other media to search for information about  
14 vaccination, but these women did not perceive these channels to be the most trustworthy  
15 sources (20).

16  
17  
18  
19  
20  
21  
22  
23  
24  
25  
26  
27  
28  
29 With the still ongoing COVID-19 pandemic and the licensing of COVID-19 vaccines, debates  
30 around vaccination flared up again. Pregnant and lactating women were initially excluded  
31 from pre-marketing clinical trials for licensing of COVID-19 vaccines, which resulted in doubts  
32 about safety, immunogenicity and the efficacy of the vaccines in these target groups.  
33 However, based on evidence from other vaccines already administered to pregnant and  
34 lactating women, no safety or efficacy issues were expected. After weighing the benefits of  
35 vaccination against the complications of disease, different countries immediately started to  
36 approve COVID-19 vaccination for these groups. Different opinions, scientifically-based or not,  
37 were shared via all sorts of social media, both by the general public and by HCPs. This scoping  
38 review provides an update to the review by Kilich et al., but also identifies additional factors  
39 related to vaccine decision-making in lactating women. Furthermore, this review reveals how  
40 COVID-19 and its accompanying vaccination campaign impacted vaccine confidence in  
41 pregnant and lactating women. Additionally, the role social media plays in creating opinions  
42 towards vaccination during pregnancy and/or lactation is studied.

## Methods

This scoping review was conducted following the PRISMA guidelines (Supplementary file 1). First a research protocol was written and grey literature was searched (Supplementary file 2). Scientific literature was found by searching the PubMed database, without language restrictions. Keywords were identified based on the systematic review from Kilich et al. (20) and additional search terms linked to social media and COVID-19 were added:

vaccin\*, immuniz\*, immunis\*, antibodies, immune response, confidence, awareness, attitude\*, anxiety, trust\*, intent\*, dilemma, perception\*, misconception\*, behaviour, behavior, anti-vaccin\*, decision-making, vaccination refusal, fear\*, distrust, mistrust, hesitancy, controvers\*, belief\*, criticis\*, misinformation, intent\*, choice\*, concern\*, knowledge, acceptance, willingness, uptake, barrier\*, disinformation, complacency, fake news, pregnan\*, maternal, prenatal, antenatal, parent\*, lactating\*, lactation, breast milk, breastfeeding, social media, internet, website\*, communication\*, social network\*, social behavior, social behaviour, message\*, forum, fora, blog\*, discussion group\*, online, Facebook, Twitter, Pinterest, LinkedIn, Instagram, Reddit, YouTube, Messenger, WhatsApp, Telegram, COVID\*, SARS-CoV-2, COVID19\*, corona\*.

Publication dates were limited starting from 23 November 2018 since Kilich et al. covered articles published until 22 November 2018. The search was done on 18 July 2022 (Supplementary file 3).

Overall, 477 records were identified in the PubMed search. All records were screened by title and abstract, from which 46 were retained to screen by full text. Articles that did not mention pregnant and/or lactating women, the COVID-19 pandemic or vaccination and/or social media were excluded. Also, reviews and abstracts without full text were not included. If the article focused on outcomes of a COVID-19 infection or COVID-19 vaccination during pregnancy/lactation, the article was rejected. Finally, after screening by full text, 37 records were selected to be included in this scoping review. Screening the references of the selected records – known as ‘the snowball search method’ or ‘snowballing’ – yielded two additional articles.

### *Patient and public involvement*

Since this article reviews the literature, no patients were involved.

1  
2  
3  
4  
5  
6  
7  
8  
9  
10  
11  
12  
13  
14  
15  
16  
17  
18  
19  
20  
21  
22  
23  
24  
25  
26  
27  
28  
29  
30  
31  
32  
33  
34  
35  
36  
37  
38  
39  
40  
41  
42  
43  
44  
45  
46  
47  
48  
49  
50  
51  
52  
53  
54  
55  
56  
57  
58  
59  
60

For peer review only

## Results

### 1. COVID-19 VACCINE ACCEPTANCE IN PREGNANT AND LACTATING WOMEN AND WOMEN PLANNING TO BE PREGNANT

In total, 32 articles about willingness to get vaccinated against COVID-19 during pregnancy, lactation and when planning to get pregnant were identified and included in this review. A summary of the selected articles can be found in Table 1.

#### 1.1. *COVID-19 vaccine confidence in pregnant women and women planning to be pregnant*

Several studies were conducted on vaccination willingness in pregnant women before the availability of COVID-19 vaccines (N= 12). In four of these studies pregnant women were less likely to accept a future COVID-19 vaccine (29.7%-62.1%) compared to breastfeeding women (38.6%-69.0%) and non-pregnant women (73.4%-81.2%) (21–24). In contrast, Erchick et al. found that more pregnant women (65.9%) were willing to get vaccinated against COVID-19 compared to non-pregnant women (59.6%), although the difference was not significant (25). In addition, Tao et al. detected a high COVID-19 vaccine acceptance rate in pregnant women in China at 77.4% (26). Furthermore, willingness to get vaccinated during pregnancy varied greatly by country: COVID-19 vaccine readiness level was above 80.0% for pregnant women in India and Mexico and lower than 45.0% in Russia, Australia and the USA (22). In the study by Ceulemans et al., six European countries were compared. The highest COVID-19 vaccine willingness during pregnancy was seen in Belgium (78.1%), whereas the lowest rate was found in Switzerland (29.7%) (21).

Twenty surveys were performed after licensure of COVID-19 vaccines, but some were conducted before the World Health Organization (WHO) and/or national authorities officially recommended vaccinating all pregnant women against COVID-19. Sutton et al. concluded that pregnant women - at that moment - were still less likely to accept a COVID-19 vaccine (44.3%) compared to breastfeeding (55.2%) and non-pregnant women (76.2%) (27). Samannodi et al. made the same significant conclusion for pregnant women and women planning to get pregnant compared to non-pregnant women and women not planning to get pregnant (28). Perez et al. divided their responders into two groups: i.e. (1) female HCPs preventing



1  
2  
3 pregnancy and (2) female HCPs who are pregnant/lactating/attempting pregnancy. They  
4 found a significant difference in vaccine willingness between both groups where group (1)  
5 significantly desired more to receive the vaccine compared to group (2) (29). Thirteen studies  
6 also mentioned COVID-19 vaccine coverage rates in pregnant women. Schaal et al. measured  
7 COVID-19 vaccine coverage in pregnant women in Germany during the same time period  
8 (March-April 2021) as Razzaghi et al. in the USA, with a remarkable difference in coverage  
9 between both studies: 2.4% in Germany versus 21.7% in the USA (30,31).

### 17 1.2. *COVID-19 vaccine confidence in lactating women*

19 Fifteen studies included lactating/postpartum women in their study population of which three  
20 studies found that lactating women were more likely to accept a COVID-19 vaccine (39.4%-  
21 69.0%) compared to pregnant women (13.8%-61.0%) (21,27,31). Nevertheless, lactating  
22 women remain less willing to receive a COVID-19 vaccine than non-pregnant and non-nursing  
23 women (27). In the follow-up study by Germann et al., 35.0% of postpartum women were  
24 willing to be vaccinated compared to only 14.0% of pregnant women. However, the  
25 breastfeeding status of the postpartum women was not clear (32). Gutierrez et al. found that  
26 women currently nursing or planning to breastfeed were less willing to receive a COVID-19  
27 vaccine compared to women who were not (33). As for pregnant women, the acceptance rate  
28 widely varies among different countries with a 79.2% acceptance rate in Belgium compared  
29 to 38.6% in Switzerland (21).

| Table 1: Overview of studies analysing vaccine confidence in COVID-19 vaccines of pregnant / lactating women |           |                           |                                               |                  |                                                                                                                                                                      |                                        |                                                                                              |
|--------------------------------------------------------------------------------------------------------------|-----------|---------------------------|-----------------------------------------------|------------------|----------------------------------------------------------------------------------------------------------------------------------------------------------------------|----------------------------------------|----------------------------------------------------------------------------------------------|
| Authors (year of publication)                                                                                | Reference | Study period              | Country of execution                          | Study design     | N° of participants                                                                                                                                                   | COVID-19 vaccine coverage              | COVID-19 vaccine willingness                                                                 |
| Abuhammad (2022)                                                                                             | (34)      | Sept 2021 – Oct 2021      | Jordan                                        | Survey           | 414 participants:<br>195 pregnant women<br>218 lactating women                                                                                                       | 50.8% of pregnant and lactating women  | NA                                                                                           |
| Ceulemans et al. (2021)                                                                                      | (21)      | 16 Jun 2020 – 14 Jul 2020 | Ireland, Norway, Switzerland, Netherlands, UK | Survey           | 16,063 participants:<br>6,661 pregnant women<br>9,402 lactating women                                                                                                | NA                                     | 61.0% of pregnant women                                                                      |
|                                                                                                              |           | 10 Apr 2020 – 31 May 2020 | Belgium                                       |                  |                                                                                                                                                                      | 69.0% of lactating women               |                                                                                              |
| Citu et al. (2022)                                                                                           | (35)      | 1 Oct 2021 – 1 Dec 2021   | Romania                                       | Survey           | 345 participants:<br>184 pregnant women<br>161 non-pregnant women of reproductive age                                                                                | NA                                     | 47.8% of pregnant women<br>59.7% of non-pregnant women of reproductive age                   |
| Citu et al. (2022)                                                                                           | (36)      | 1 Jan 2022 – 1 May 2022   | Romania                                       | Survey           | 345 pregnant women                                                                                                                                                   | 53.3% of pregnant women                | NA                                                                                           |
| Egloff et al. (2022)                                                                                         | (37)      | 18 Feb 2021 – 5 Apr 2021  | France                                        | Survey           | 664 pregnant women                                                                                                                                                   | NA                                     | 29.5% of pregnant women                                                                      |
| Erchick et al. (2022)                                                                                        | (25)      | 15 Dec 2020 – 23 Dec 2020 | USA                                           | Survey           | 8,481 participants:<br>233 pregnant women<br>8,248 non-pregnant women                                                                                                | NA                                     | 65.9% of pregnant women<br>59.6% of non-pregnant women                                       |
| Geoghegan et al. (2021)                                                                                      | (38)      | 4 Dec 2020 – 14 Jan 2021  | Ireland                                       | Survey           | 300 pregnant women                                                                                                                                                   | NA                                     | 38.0% during pregnancy<br>63.0% after pregnancy                                              |
| Germann et al. (2022)                                                                                        | (32)      | 22 Mar 2021 – 2 Apr 2021  | USA                                           | Survey           | 456 participants:<br>435 pregnant women<br>21 postpartum women                                                                                                       | NA                                     | 60.0% of pregnant and postpartum women                                                       |
|                                                                                                              |           | 29 Jun 2021 – 20 Nov 2021 |                                               | Follow-up survey | 290 participants:<br>68 pregnant women<br>222 postpartum women                                                                                                       | 52.0% of pregnant and postpartum women | 14.0% of pregnant women<br>35% of postpartum women                                           |
| Gutierrez et al. (2022)                                                                                      | (33)      | Jan 2021                  | USA                                           | Survey           | 5,269 participants:<br>1,190 pregnant and postpartum women                                                                                                           | NA                                     | 53.4% of pregnant and postpartum women<br>57.1% of other participants                        |
| Hosokawa et al. (2022)                                                                                       | (39)      | 24 Jul 2021 – 30 Aug 2021 | Japan                                         | Survey           | 1,621 pregnant women                                                                                                                                                 | 13.4% of pregnant women                | 49.1% of pregnant women                                                                      |
| Kuciel et al. (2022)                                                                                         | (40)      | 1 Jul 2021 – 30 Aug 2021  | Poland                                        | Survey           | 118 participants:<br>28 pregnant women<br>60 lactating women<br>109 mothers                                                                                          | NA                                     | NA                                                                                           |
| Levy et al. (2021)                                                                                           | (41)      | 14 Dec 2020 – 14 Jan 2021 | USA                                           | Survey           | 662 pregnant women                                                                                                                                                   | NA                                     | 58.3% of pregnant women                                                                      |
| Mappa et al. (2021)                                                                                          | (42)      | 27 Dec 2020               | Italy                                         | Survey           | 161 pregnant women                                                                                                                                                   | NA                                     | 52.9% of pregnant women                                                                      |
| Mohan et al. (2021)                                                                                          | (43)      | 15 Oct 2020 – 15 Nov 2020 | Qatar                                         | Survey           | 341 pregnant and lactating women                                                                                                                                     | NA                                     | 49.1% of participants                                                                        |
| Nguyen et al. (2021)                                                                                         | (44)      | Jan – Feb 2021            | Vietnam                                       | Survey           | 651 participants: pregnant women or postpartum                                                                                                                       | NA                                     | 60.4% of all participants                                                                    |
| Oluklu et al. (2021)                                                                                         | (45)      | 11 Feb 2021 – 21 Mar 2021 | Turkey                                        | Survey           | 412 postpartum women:<br>363 lactating women                                                                                                                         | NA                                     | 33.3% of postpartum women                                                                    |
| Perez et al. (2021)                                                                                          | (29)      | 8 Jan 2021 – 31 Jan 2021  | USA                                           | Survey           | 11,405 female HCP of reproductive age:<br>955 women attempting pregnancy<br>2,196 pregnant women<br>2,250 lactating women<br>67 lactating women attempting pregnancy | 73.6% of all participants              | 75.3% of all participants strongly desire or desired vaccination – 1.5% are strongly adverse |

|                             |      |                             |                                                                                                                                           |                            |                                                                                            |                                                                                  |                                                                                    |
|-----------------------------|------|-----------------------------|-------------------------------------------------------------------------------------------------------------------------------------------|----------------------------|--------------------------------------------------------------------------------------------|----------------------------------------------------------------------------------|------------------------------------------------------------------------------------|
|                             |      |                             |                                                                                                                                           |                            | 91 women pregnant and lactating<br>5,846 preventing pregnancy                              |                                                                                  |                                                                                    |
| Perrotta et al. (2022)      | (46) | 1 Mar 2021 – 23 Jul 2021    | USA                                                                                                                                       | Survey                     | 299 pregnant women                                                                         | 20.7% of pregnant women                                                          | 42.8% of pregnant women                                                            |
| Pisula et al. (2022)        | (47) | 24 Oct 2021 – 9 Nov 2021    | Poland                                                                                                                                    | Survey                     | 515 pregnant women                                                                         | 58.1% of pregnant women                                                          | 6.2% of pregnant women                                                             |
| Razzaghi et al. (2022)      | (30) | 31 Mar 2021 – 16 Apr 2021   | USA                                                                                                                                       | Survey                     | 1,561 pregnant women                                                                       | 21.7% of pregnant women                                                          | 24.0% of pregnant women                                                            |
| Redmond et al. (2022)       | (48) | June 2020 – Aug 2020        | USA                                                                                                                                       | Survey                     | 26 pregnant women<br>1 postpartum woman                                                    | NA                                                                               | 63.0% of pregnant and postpartum women                                             |
| Riad et al. (2021)          | (49) | Aug 2021 – Oct 2021         | Czechia                                                                                                                                   | Survey                     | 362 participants:<br>278 pregnant women<br>84 lactating women                              | NA                                                                               | 66.6% of pregnant and lactating women                                              |
| Saleh et al. (2022)         | (50) | End Sep 2020 – mid-Jan 2021 | Israel                                                                                                                                    | Survey                     | 410 participants:<br>293 pregnant women<br>117 postpartum women of whom 84 were lactating  | NA                                                                               | 40% of postpartum participants                                                     |
| Samannodi et al. (2021)     | (51) | 12 Jun 2021 – 1 Aug 2021    | Saudi Arabia                                                                                                                              | Survey                     | 431 women:<br>214 women pregnant or planning to be pregnant                                | 57.1% of all participants                                                        | NA                                                                                 |
| Schaal et al. (2021)        | (31) | 30 Mar 2021 – 19 Apr 2021   | Germany                                                                                                                                   | Survey                     | 2,339 participants:<br>1,043 pregnant women<br>1,296 lactating women                       | 2.4% of pregnant women<br>13.7% of lactating women                               | 13.8% of pregnant women<br>39.4% of lactating women                                |
| Skirrow et al. (2022)       | (24) | 3 Aug 2020 – 11 Oct 2020    | UK                                                                                                                                        | Survey                     | 1,181 pregnant women                                                                       | NA                                                                               | 62.1% during current pregnancy                                                     |
|                             |      | 7 Dec 2020 – 16 Dec 2020    |                                                                                                                                           | Semi-structured interviews | 10 pregnant women                                                                          |                                                                                  | 81.2% <u>after delivery</u>                                                        |
| Skjefte et al. (2021)       | (22) | 28 Oct 2020 – 18 Nov 2020   | Italy, Chile, Peru, New Zealand, Russia, Australia, Colombia, Brazil, Spain, South Africa, India, Mexico, Philippines, Argentina, USA, UK | Survey                     | 17,871 participants:<br>5,294 pregnant women<br>12,562 non-pregnant women                  | NA                                                                               | 52.0% of pregnant women<br>73.4% of non-pregnant women                             |
| Stuckelberger et al. (2021) | (52) | 18 Jun 2020 – 12 Jul 2020   | Switzerland                                                                                                                               | Survey                     | 1,551 participants:<br>515 pregnant women<br>1,036 lactating women                         | NA                                                                               | 29.7% of pregnant women<br>38.6% of lactating women                                |
| Sutton et al. (2021)        | (27) | 7 Jan 2021 – 29 Jan 2021    | USA                                                                                                                                       | Survey                     | 1,012 participants:<br>216 pregnant women<br>122 lactating women<br>656 non-pregnant women | 1.9% of pregnant women<br>3.3% of lactating women<br>13.3% of non-pregnant women | 44.3% of pregnant women<br>55.2% of lactating women<br>76.2% of non-pregnant women |
| Tao et al. (2021)           | (26) | 13 Nov 2020 – 27 Nov 2020   | China                                                                                                                                     | Survey                     | 1,392 pregnant women                                                                       | NA                                                                               | 77.0% of pregnant women                                                            |
| Ward et al. (2022)          | (53) | NA                          | Australia                                                                                                                                 | Survey                     | 218 pregnant women                                                                         | 44.0% of pregnant women                                                          | 7.4% of pregnant women                                                             |
| Waring et al. (2022)        | (54) | Mid-Feb 2021 – mid-Mar 2021 | USA                                                                                                                                       | Survey                     | 203 women:<br>15 pregnant women<br>188 non-pregnant women (mothers)                        | 47.3% of pregnant and non-pregnant women                                         | 66.0% of pregnant women<br>73.0% of non-pregnant women                             |

## 2. COVID-19 VACCINE CONFIDENCE IN HCP

Deruelle et al. investigated the perception of French HCPs towards COVID-19 vaccination during pregnancy. The survey was performed between 11 January and 1 March 2021. Overall, midwives were less likely to recommend COVID-19 vaccination during pregnancy (37.5%), compared to general practitioners (50.7%) and obstetricians (58.8%) (55).

To study how HCPs view COVID-19 vaccination during pregnancy, Bradfield et al. conducted a survey of women (including pregnant and lactating women), midwives, doctors providing maternity care and midwifery students in Australia in early 2021. They found that doctors and midwifery students were significantly more likely to advise COVID-19 vaccination during pregnancy compared to midwives. Unfortunately, in this study, pregnant and lactating women were not asked if a recommendation from a HCP was a motivational factor or not when looking at influential factors that determined pregnant and lactating women's decision to be vaccinated (56).

## 3. DETERMINANTS PREDICTING COVID-19 VACCINE ACCEPTANCE

Most of the surveys (N= 26) included in this review not only measured readiness to get vaccinated against COVID-19 during pregnancy or lactation, but also described determinants influencing COVID-19 vaccine acceptance.

### 3.1. *Factors influencing COVID-19 vaccine acceptance during pregnancy*

The most important reason for refusing COVID-19 vaccination during pregnancy is safety concerns, as described in 19 studies (22,24–27,30–32,37–39,41–43,46–49,53). These safety concerns include possible harm to the baby and to the mother, both in the short and long term. Other concerns include that there is not yet enough clinical trial data on COVID-19 vaccination during pregnancy (22,24,27,31,32,46) and that COVID-19 vaccines are seen as not being trustworthy because they were developed and approved rapidly (22,24,30,39). Hosowaka et al. defined mistrust in the government as the only significant factor linked to vaccine hesitancy among pregnant women in Japan (39). Not believing in vaccines and in the existence of the SARS-CoV-2 virus, not being afraid of COVID-19, and trusting rumours on social media were also described by Citu et al. as statistically independent risk factors for vaccine hesitancy among pregnant women (35).

1  
2  
3 Receiving an influenza vaccine (27,30,32,37,52) and/or pertussis vaccine during pregnancy  
4 (24,32) are positive determinants for accepting COVID-19 vaccination among pregnant  
5 women. Other positive factors are a recommendation by a HCP or having a discussion with a  
6 HCP about COVID-19 vaccines (30,32,37,38,48,53), believing to be at high risk of or concerns  
7 about contracting COVID-19 (22,29,32), being aware of having an increased risk of severe  
8 illness due to COVID-19 (53), and living with individuals with or themselves suffering from co-  
9 morbidities/high risk conditions (30).

10  
11  
12 Demographic factors associated with better COVID-19 vaccine willingness are a higher level of  
13 education (22,32,33,36,37,39,41,42,46,47,49,50,52), being employed (30,32,42,50), having a  
14 higher income (22,24,33,35,36,46,47), older age (22,24,25,32,33,37,41,46,49,52), being in the  
15 third trimester of gestation (26,36,38,49,52), multiparity (37,49), and living in an urban area  
16 (35,36,47,50). Other demographic factors linked to COVID-19 vaccine willingness are race and  
17 ethnicity (24,29,30,41,43,50). Interestingly, Tao et al. found that pregnant Chinese women of  
18 younger age and with a lower level of education were more likely to accept COVID-19  
19 vaccination (26).

### 3.2. *Factors influencing COVID-19 vaccine acceptance during lactation*

20  
21  
22 Lactating/postpartum women were found to have similar safety concerns to pregnant women  
23 (27,31,32,45,49). One of the reasons for refusing the vaccine or being hesitant about getting  
24 it is the lack of reliable data on the administration and effectiveness of a COVID-19 vaccine  
25 during lactation (31,45). Additionally, Sutton et al. described that there were concerns in this  
26 target group that the COVID-19 vaccine could cause infertility (27).

27  
28  
29 Gutierrez et al. and Stuckelberger et al. described several demographic factors in pregnant  
30 and lactating/postpartum women associated with a lower likelihood of vaccination: younger  
31 age (33,52), lower level of education (33,52) and lower income (33). However, both studies  
32 did not distinguish between pregnant and lactating/postpartum women (33,52). Riad et al.  
33 found that there was no significant difference in age and educational level in the group of  
34 lactating women willing to accept the vaccine and the group of lactating women resistant to  
35 the vaccine. However, lactating healthcare workers had a significantly higher COVID-19  
36 vaccine acceptance level compared to non-healthcare workers (49).

#### 4. THE IMPACT OF THE COVID-19 PANDEMIC ON OTHER VACCINATIONS

Several studies also discussed vaccination willingness for other diseases during pregnancy in COVID-19 times. Two studies focused on influenza, one focused on pertussis while another one focused on vaccines during pregnancy in general (47,50,57,58). Gencer et al. found that 77.0% of the pregnant women they interviewed received or intended to receive vaccination during pregnancy. For 50.6% of these women, the COVID-19 pandemic had not affected their views on being vaccinated in the future (57).

The study by Saleh et al. analysed the effect of the COVID-19 pandemic on seasonal influenza vaccine compliance among pregnant and postpartum women in Israel from September 2020 until mid-January 2021. They found that, despite the high incidence of COVID-19, vaccine uptake was similar to pre-pandemic times with 54.4% of the women studied being vaccinated against influenza (50).

Pisula et al. investigated the knowledge and attitudes of pregnant women towards influenza vaccination in 2021. In total, 21.0% had been vaccinated against influenza during pregnancy and 17.5% were planning to get vaccinated. They stated that there is a link between influenza vaccine uptake and COVID-19 vaccine uptake in pregnant women. Women who refused COVID-19 vaccination did not intend to get an influenza vaccine and vice versa (47).

Skirrow et al. explored the experience of women getting vaccinated against pertussis during pregnancy in COVID-19 times. The study used an online survey which was spread from 3 August until 11 October 2020. The survey was completed by 922 pregnant women and 482 postpartum women who had been pregnant at some point after the first lockdown in the United Kingdom. They found that 72.1% of pregnant women and 84.0% of postpartum women had received a pertussis vaccine during pregnancy even when access was hampered due to COVID-19 restrictions (58).

#### 5. THE IMPACT OF SOCIAL MEDIA ON COVID-19 VACCINE CONFIDENCE

Riad et al. stated that social media is an important source of information on COVID-19 vaccines for pregnant and lactating women. However, only 8.3% of the pregnant and lactating women studied reported that media/social media was an impactful factor when deciding to receive or not receive COVID-19 vaccination (49).

1  
2  
3 Hahn et al. conducted three surveys in remote Alaskan communities, focusing on the impact  
4 of COVID-19 on their daily life and their attitude towards COVID-19 vaccination between  
5 November 2020 and September 2021. By September 2021, misunderstandings about vaccine  
6 recommendations during pregnancy and the effects of COVID-19 vaccination on fertility and  
7 DNA were present in participants where social media was identified as the primary source of  
8 information (59).  
9

10  
11  
12  
13  
14 Using Google Trends, Maugeri et al. investigated the changes in Google Search interest on  
15 vaccination during pregnancy after the introduction of COVID-19 vaccination in Italy. The data  
16 covered searches from 1 January 2019 until 31 October 2021. This made it possible to monitor  
17 the changes over two years from before the introduction of COVID-19 vaccination until 31  
18 October 2021. The analysis of Google Trends indicated that the search interest for 'vaccination  
19 in pregnancy' was increased significantly (both qualitative and quantitative) compared to the  
20 predicted trend after the start of the Italian COVID-19 vaccination campaign. Moreover,  
21 further qualitative analysis showed that the increase was most likely due to concerns about  
22 COVID-19 vaccination (60).  
23  
24  
25  
26  
27  
28  
29

30 Citu et al. identified that trusting rumours on social media had the greatest impact on vaccine  
31 hesitancy among pregnant Romanian women. Compared to non-pregnant women (63.0%),  
32 significantly more pregnant women (78.1%) answered 'yes' to the question if they trusted  
33 social media rumours (35). In a survey conducted a few months later, Citu et al. found that  
34 unvaccinated pregnant women (44.7%) were significantly more likely to select social media as  
35 a trustworthy decision-making factor compared to vaccinated pregnant women (25.0%) (36).  
36  
37  
38 In a study by Marcell et al., a social media campaign was set up in Washington called 'One Vax  
39 Two Lives' to encourage the spread of scientifically-based information about the risks of  
40 COVID-19 and benefits of COVID-19 vaccination during pregnancy. They reached a lot of  
41 people through ads on Facebook and Instagram, but the number of visitors to their  
42 informative website remained rather low. It is not clear what the actual impact of their  
43 campaign was on vaccine confidence and uptake in pregnant women (61).  
44  
45  
46  
47  
48  
49  
50  
51  
52  
53  
54  
55  
56  
57  
58  
59  
60

## Discussion

Maternal vaccination has already proven to be an effective means to prevent infectious disease-related morbidity and mortality in pregnant women, foetuses and infants. During the COVID-19 pandemic, the topic of vaccination during pregnancy and lactation received a lot of attention. In many countries, HCPs were one of the priority groups to receive vaccination against COVID-19. A lot of these HCPs are of fertile age, pregnant and/or lactating. These women were among the first fertile/pregnant/lactating women to be vaccinated against COVID-19. The vaccine was assumed to be safe for these target groups, based on previous research which generated reassuring evidence on the use of inactivated vaccines during pregnancy/lactation. However, lack of robust data on the safety, immunogenicity and efficacy of the COVID-19 vaccines and the existence of varying recommendations concerning COVID-19 vaccination during pregnancy and lactation in different areas of the world started an important debate on COVID-19 vaccination during pregnancy and lactation.

Even before the start of the COVID-19 pandemic, the World Health Organization (WHO) defined vaccine hesitancy as one of the top ten threats to global health (62). Therefore, insights into factors influencing willingness to get vaccinated are crucial to plan effective interventions to increase vaccine coverage, especially in high-risk groups (such as pregnant and lactating women). Surveys performed during the COVID-19 pandemic - both before and after licensure of COVID-19 vaccines - demonstrated that willingness to get vaccinated against COVID-19 is generally lower in pregnant and lactating women than in non-pregnant and non-nursing women, which was not a surprising finding. On a global scale, vaccine hesitancy is more common in pregnant and lactating women. Many studies have reported that there are low coverage rates for influenza and Tdap vaccines in pregnant and lactating women. This population also shows low vaccine confidence. However, the overall reluctance towards COVID-19 vaccination is even higher compared to other vaccines recommended to be administered during pregnancy and/or lactation. This is possibly caused by the belief that COVID-19 vaccines were tested and approved too quickly and that in the initial pre-marketing trials no data were collected on pregnant and lactating women.



1  
2  
3 Safety concerns are reported as the main reason for refusal of COVID-19 vaccination during  
4 pregnancy and lactation. The belief that COVID-19 vaccines could cause harm to the  
5 reproductive system, foetus/baby and/or to the women themselves is the most commonly  
6 cited driver for vaccine hesitancy. This is not a new observation; before the COVID-19  
7 pandemic, Wilson et al. already reported these concerns as the most frequently cited barrier  
8 to being vaccinated during pregnancy (63).  
9

10  
11 The reasons for vaccine hesitancy towards COVID-19 vaccination in pregnant and lactating  
12 women are comparable to those in the general population, where concerns about safety,  
13 efficacy and the rapid development and approval of the vaccines are also the key  
14 determinants for COVID-19 vaccine refusal (64). These observations highlight the importance  
15 of high-quality clinical trials that include pregnant and lactating women. Furthermore, it is  
16 important to clearly and transparently communicate the findings from these trials to all  
17 population groups to increase vaccine coverage rates.  
18  
19

20  
21 Before the start of the pandemic, Kilich et al. defined a HCP recommendation as the most  
22 important factor affecting vaccine confidence during pregnancy (20); later studies found the  
23 same for COVID-19 vaccination. Redmond et al. pinpointed recommendations from HCPs as  
24 the most influential strategy to increase vaccine willingness (48). However, these  
25 recommendations are often still overshadowed by anxiety about side effects and messages  
26 circulating social media. Another worrying factor is that not all HCPs support COVID-19  
27 vaccination during pregnancy. Especially midwives seem to be less likely to recommend  
28 COVID-19 vaccination during pregnancy, which is in line with studies on other vaccines before  
29 the pandemic (65). Therefore, it is crucial to provide HCPs access to tailored information on  
30 vaccination. Moreover, proper education of HCPs concerning the effects and importance of  
31 vaccines during pregnancy and lactation is needed.  
32  
33  
34  
35  
36  
37  
38  
39  
40  
41  
42  
43  
44  
45  
46  
47  
48  
49

50  
51 Besides clear formulation of vaccination recommendations during pregnancy/lactation, it is of  
52 equal importance that correct information on these recommendations reaches the target  
53 groups. In a survey conducted in remote Alaskan communities, Hahn et al. found that 22.8%  
54 of the participants were not aware that COVID-19 vaccination was recommended during  
55 pregnancy, 26.5% of the participants were unsure about a recommendation for pregnant  
56 women, and 28.1% of the participants were uncertain if COVID-19 vaccination would affect  
57  
58  
59  
60

1  
2  
3 fertility or not. Furthermore, participants often cited pregnancy and lactation as reasons to  
4 postpone COVID-19 vaccination (59). Additionally, in a questionnaire in Saudi Arabia on public  
5 knowledge regarding COVID-19 vaccination, 46.2% of males and 24.2% of females did not  
6 know if COVID-19 vaccination was recommended for pregnant women or not. Also, 72.4% of  
7 female participants stated that COVID-19 vaccination was not preferred during pregnancy  
8 (66).  
9

10  
11 To avoid the misconceptions mentioned above and to make sure that target groups are made  
12 aware of the most recent recommendations, specific programmes and tools need to be  
13 developed – each adapted according to region, language and accessibility. Here, proper  
14 education of HCPs is again key to support these programmes and tools to make these  
15 interventions effective.  
16

17  
18 Since social media has become an integral part of our lives, these platforms can be used to  
19 inform women who are pregnant, lactating or planning to be pregnant about vaccine  
20 recommendations. For many, it has become an important source of information and it is used  
21 to form an opinion about all kinds of topics, including COVID-19 and COVID-19 vaccination. In  
22 Italy, research by Maugeri et al. showed that Google Search interest for ‘vaccination in  
23 pregnancy’ increased significantly after Italy’s COVID-19 vaccination campaign had started  
24 (60). Further research is still needed to accurately define the relation between social media  
25 and Internet searches and actual vaccine uptake during pregnancy or lactation.  
26  
27  
28  
29  
30  
31  
32  
33  
34  
35  
36  
37  
38  
39

40 A six month follow-up study comparing COVID-19 vaccine hesitancy and actual vaccine uptake  
41 in pregnant and postpartum women concluded that being hesitant towards COVID-19  
42 vaccines at baseline persisted, with only 10% of individuals transitioning from being vaccine  
43 hesitant to being vaccinated (32). This highlights that efficient interventions and educational  
44 strategies need to be developed to increase vaccine confidence, which subsequently increases  
45 vaccine coverage rates in pregnant and postpartum women. Therefore, a project was started  
46 at the University of Antwerp funded by the Vaccine Confidence Fund to identify which factors  
47 linked to social media influence vaccine confidence and in the long run the uptake of pertussis,  
48 influenza and COVID-19 vaccines in women of childbearing age, and pregnant and lactating  
49 women. The overall aim of this project - which this review is also part of - is to identify which  
50 interventions are efficient in increasing vaccine confidence in pregnant and lactating women.  
51  
52  
53  
54  
55  
56  
57  
58  
59  
60

## Conclusion

Vaccine hesitancy during pregnancy and lactation remains an important topic to study, especially in times of a pandemic and with the fast development of new vaccines. To improve vaccine confidence in these target groups, the inclusion of pregnant and lactating women in clinical trials could reduce safety concerns, as this was identified as the main reason to refuse vaccination. In addition, proper education of HCPs and clear, universal recommendations can also contribute to increase vaccine willingness. Further research is necessary to define the role social media plays in actual vaccine uptake. However, from our findings it can be concluded that social media messages can influence vaccine confidence in pregnant and lactating women.

## Author's contribution

LDB and KM conducted the review. PVD, GH, KP, WD read the review and provided input and comments. All authors contributed to the article and approved the submitted version.

## Funding statement

This review was funded by a grant (VCF – 010) from the Vaccine Confidence Fund, a philanthropic and charitable fund of Global Impact.

## Competing interest

None declared.

## Ethics approval

Not applicable.

## Data sharing statement

No additional data are available.

## References

1. Jamieson DJ, Rasmussen SA. An update on COVID-19 and pregnancy. Vol. 226, *American Journal of Obstetrics and Gynecology*. Elsevier Inc.; 2022. p. 177–86.
2. Omer SB, Bednarczyk RA, Madhi SA, Klugman KP. Benefits to mother and child of influenza vaccination during pregnancy. Vol. 8, *Human Vaccines and Immunotherapeutics*. 2012. p. 130–7.
3. Kandeil W, van den Ende C, Bunge EM, Jenkins VA, Ceregido MA, Guignard A. A systematic review of the burden of pertussis disease in infants and the effectiveness of maternal immunization against pertussis. Vol. 19, *Expert Review of Vaccines*. Taylor and Francis Ltd.; 2020. p. 621–38.
4. Mertz D, Geraci J, Winkup J, Gessner BD, Ortiz JR, Loeb M. Pregnancy as a risk factor for severe outcomes from influenza virus infection: A systematic review and meta-analysis of observational studies. Vol. 35, *Vaccine*. Elsevier Ltd; 2017. p. 521–8.
5. WHO. WHO recommendation pertussis [Internet]. [cited 2022 Apr 4]. Available from: [https://www.who.int/health-topics/pertussis#tab=tab\\_2](https://www.who.int/health-topics/pertussis#tab=tab_2)
6. Masseria C, Martin CK, Krishnarajah G, Becker LK, Buikema A, Tan TQ. Incidence and burden of pertussis among infants less than 1 year of age. *Pediatric Infectious Disease Journal*. 2017;36(3):e54–61.
7. Allotey J, Stallings E, Bonet M, Yap M, Chatterjee S, Kew T, et al. Clinical manifestations, risk factors, and maternal and perinatal outcomes of coronavirus disease 2019 in pregnancy: Living systematic review and meta-analysis. *The BMJ*. 2020 Sep 1;370.
8. Lokken EM, Huebner EM, Taylor GG, Hendrickson S, Vanderhoeven J, Kachikis A, et al. Disease severity, pregnancy outcomes, and maternal deaths among pregnant patients with severe acute respiratory syndrome coronavirus 2 infection in Washington State. *Am J Obstet Gynecol*. 2021 Jul 1;225(1):77.e1-77.e14.
9. Wei SQ, Bilodeau-Bertrand M, Liu S, Auger N. The impact of COVID-19 on pregnancy outcomes: A systematic review and meta-analysis. Vol. 193, *CMAJ. Canadian Medical Association*; 2021. p. E540–8.
10. Smith V, Seo D, Warty R, Payne O, Salih M, Chin KL, et al. Maternal and neonatal outcomes associated with COVID-19 infection: A systematic review. *PLoS One*. 2020 Jun 1;15(6).
11. Cui X, Zhao Z, Zhang T, Guo W, Guo W, Zheng J, et al. A systematic review and meta-analysis of children with coronavirus disease 2019 (COVID-19). *J Med Virol* [Internet]. 2021 Feb 28;93(2):1057–69. Available from: <https://onlinelibrary.wiley.com/doi/10.1002/jmv.26398>
12. Sebghati M, Khalil A. Uptake of vaccination in pregnancy. Vol. 76, *Best Practice and Research: Clinical Obstetrics and Gynaecology*. Bailliere Tindall Ltd; 2021. p. 53–65.
13. Maltezou HC, Effraimidou E, Cassimos DC, Medic S, Topalidou M, Konstantinidis T, et al. Vaccination programs for pregnant women in Europe, 2021. *Vaccine*. 2021 Oct 1;39(41):6137–43.
14. WHO. WHO recommendation COVID-19 [Internet]. [cited 2022 Jul 15]. Available from: <https://www.who.int/emergencies/diseases/novel-coronavirus-2019/covid-19-vaccines/advice>
15. WHO. WHO recommendation influenza [Internet]. [cited 2022 Jul 15]. Available from: <https://www.who.int/teams/global-influenza-programme/vaccines/vaccine-use>

16. Lajos GJ, Fialho SCAV, Kfoury RDÁ, Robial R, Roteli-Martins CM. Vaccination in pregnant and postpartum women. *Revista Brasileira de Ginecologia e Obstetricia*. 2020 Dec 1;42(12):851–5.
17. Luxi N, Giovanazzi A, Capuano A, Crisafulli S, Cutroneo PM, Fantini MP, et al. COVID-19 Vaccination in Pregnancy, Paediatrics, Immunocompromised Patients, and Persons with History of Allergy or Prior SARS-CoV-2 Infection: Overview of Current Recommendations and Pre- and Post-Marketing Evidence for Vaccine Efficacy and Safety. Vol. 44, *Drug Safety*. Adis; 2021. p. 1247–69.
18. Giles ML, Gunatilaka A, Palmer K, Sharma K, Roach V. Alignment of national COVID-19 vaccine recommendations for pregnant and lactating women. *Bull World Health Organ*. 2021 Oct 1;99(10):739–46.
19. Drezner D, Youngster M, Klainer H, Youngster I. Maternal vaccinations coverage and reasons for non-compliance - A cross-sectional observational study. *BMC Pregnancy Childbirth*. 2020 Sep 16;20(1).
20. Kilich E, Dada S, Francis MR, Tazare J, Chico RM, Paterson P, et al. Factors that influence vaccination decisionmaking among pregnant women: A systematic review and meta-analysis. *PLoS One*. 2020 Jul 1;15(7 July 2020).
21. Ceulemans M, Foulon V, Panchaud A, Winterfeld U, Pomar L, Lambelet V, et al. Vaccine willingness and impact of the covid-19 pandemic on women’s perinatal experiences and practices—a multinational, cross-sectional study covering the first wave of the pandemic. *Int J Environ Res Public Health*. 2021 Apr 1;18(7).
22. Skjefte M, Ngirbabul M, Akeju O, Escudero D, Hernandez-Diaz S, Wyszynski DF, et al. COVID-19 vaccine acceptance among pregnant women and mothers of young children: results of a survey in 16 countries. *Eur J Epidemiol*. 2021 Feb 1;36(2):197–211.
23. Stuckelberger S, Favre G, Ceulemans M, Nordeng H, Gerbier E, Lambelet V, et al. Sars-cov-2 vaccine willingness among pregnant and breastfeeding women during the first pandemic wave: A cross-sectional study in Switzerland. *Viruses*. 2021 Jul 1;13(7).
24. Skirrow H, Barnett S, Bell S, Riaposova L, Mounier-Jack S, Kampmann B, et al. Women’s views on accepting COVID-19 vaccination during and after pregnancy, and for their babies: a multi-methods study in the UK. *BMC Pregnancy Childbirth* [Internet]. 2022 Dec 14;22(1):33. Available from: <https://bmcpregnancychildbirth.biomedcentral.com/articles/10.1186/s12884-021-04321-3>
25. Erchick DJ, Agarwal S, Kaysin A, Gibson DG, Labrique AB. Changes in prenatal care and vaccine willingness among pregnant women during the COVID-19 pandemic. *BMC Pregnancy Childbirth* [Internet]. 2022 Dec 13;22(1):558. Available from: <https://bmcpregnancychildbirth.biomedcentral.com/articles/10.1186/s12884-022-04882-x>
26. Tao L, Wang R, Han N, Liu J, Yuan C, Deng L, et al. Acceptance of a COVID-19 vaccine and associated factors among pregnant women in China: a multi-center cross-sectional study based on health belief model. *Hum Vaccin Immunother*. 2021;17(8):2378–88.
27. Sutton D, D’Alton M, Zhang Y, Kahe K, Cepin A, Goffman D, et al. COVID-19 vaccine acceptance among pregnant, breastfeeding, and nonpregnant reproductive-aged women. *Am J Obstet Gynecol MFM*. 2021 Sep 1;3(5).
28. Samannodi M. COVID-19 vaccine acceptability among women who are pregnant or planning for pregnancy in Saudi Arabia: A cross-sectional study. *Patient Prefer Adherence*. 2021;15:2609–18.

- 1
  - 2
  - 3
  - 4
  - 5
  - 6
  - 7
  - 8
  - 9
  - 10
  - 11
  - 12
  - 13
  - 14
  - 15
  - 16
  - 17
  - 18
  - 19
  - 20
  - 21
  - 22
  - 23
  - 24
  - 25
  - 26
  - 27
  - 28
  - 29
  - 30
  - 31
  - 32
  - 33
  - 34
  - 35
  - 36
  - 37
  - 38
  - 39
  - 40
  - 41
  - 42
  - 43
  - 44
  - 45
  - 46
  - 47
  - 48
  - 49
  - 50
  - 51
  - 52
  - 53
  - 54
  - 55
  - 56
  - 57
  - 58
  - 59
  - 60
29. Perez MJ, Paul R, Raghuraman N, Carter EB, Odibo AO, Kelly JC, et al. Characterizing initial COVID-19 vaccine attitudes among pregnancy-capable healthcare workers. *Am J Obstet Gynecol MFM* [Internet]. 2022 Mar;4(2):100557. Available from: <https://linkinghub.elsevier.com/retrieve/pii/S2589933321002536>
30. Razzaghi H, Kahn KE, Masalovich S, Black CL, Nguyen KH, Barfield WD, et al. COVID-19 Vaccination and Intent Among Pregnant Women, United States, April 2021. *Public Health Reports* [Internet]. 2022 Jun 14;003335492210992. Available from: <http://journals.sagepub.com/doi/10.1177/00333549221099244>
31. Schaal NK, Zöllkau J, Hepp P, Fehm T, Hagenbeck C. Pregnant and breastfeeding women's attitudes and fears regarding the COVID-19 vaccination. *Arch Gynecol Obstet*. 2021;
32. Germann K, Kiefer MK, Rood KM, Mehl R, Wu J, Pandit R, et al. Association of initial COVID-19 vaccine hesitancy with subsequent vaccination among pregnant and postpartum individuals. *BJOG* [Internet]. 2022 Jul 19;129(8):1352–60. Available from: <https://onlinelibrary.wiley.com/doi/10.1111/1471-0528.17189>
33. Gutierrez S, Logan R, Marshall C, Kerns J, Diamond-Smith N. Predictors of COVID-19 Vaccination Likelihood Among Reproductive-Aged Women in the United States. *Public Health Reports* [Internet]. 2022 May 3;137(3):588–96. Available from: <http://journals.sagepub.com/doi/10.1177/00333549221081123>
34. Abuhammad S. Attitude of pregnant and lactating women toward COVID-19 vaccination in Jordan: a cross-sectional study. *J Perinat Med* [Internet]. 2022 May 3;0(0). Available from: <https://www.degruyter.com/document/doi/10.1515/jpm-2022-0026/html>
35. Citu IM, Citu C, Gorun F, Motoc A, Gorun OM, Burlea B, et al. Determinants of COVID-19 Vaccination Hesitancy among Romanian Pregnant Women. *Vaccines (Basel)* [Internet]. 2022 Feb 10;10(2):275. Available from: <https://www.mdpi.com/2076-393X/10/2/275>
36. Citu C, Chiriac VD, Citu IM, Gorun OM, Burlea B, Bratosin F, et al. Appraisal of COVID-19 Vaccination Acceptance in the Romanian Pregnant Population. *Vaccines (Basel)* [Internet]. 2022 Jun 15;10(6):952. Available from: <https://www.mdpi.com/2076-393X/10/6/952>
37. Egloff C, Couffignal C, Cordier AG, Deruelle P, Sibiude J, Anselem O, et al. Pregnant women's perceptions of the COVID-19 vaccine: A French survey. *Brownie SM, editor. PLoS One* [Internet]. 2022 Feb 7;17(2):e0263512. Available from: <https://dx.plos.org/10.1371/journal.pone.0263512>
38. Geoghegan S, Stephens LC, Feemster KA, Drew RJ, Eogan M, Butler KM. "This choice does not just affect me." Attitudes of pregnant women toward COVID-19 vaccines: a mixed-methods study. *Hum Vaccin Immunother*. 2021;17(10):3371–6.
39. Hosokawa Y, Okawa S, Hori A, Morisaki N, Takahashi Y, Fujiwara T, et al. The Prevalence of COVID-19 Vaccination and Vaccine Hesitancy in Pregnant Women: An Internet-based Cross-sectional Study in Japan. *J Epidemiol* [Internet]. 2022 Apr 5;32(4):JE20210458. Available from: [https://www.jstage.jst.go.jp/article/jea/32/4/32\\_JE20210458/\\_article](https://www.jstage.jst.go.jp/article/jea/32/4/32_JE20210458/_article)
40. Kuciel N, Mazurek J, Hap K, Marciniak D, Biernat K, Sutkowska E. COVID-19 Vaccine Acceptance in Pregnant and Lactating Women and Mothers of Young Children in Poland. *Int J Womens Health* [Internet]. 2022 Mar;Volume 14:415–24. Available from: <https://www.dovepress.com/covid-19-vaccine-acceptance-in-pregnant-and-lactating-women-and-mother-peer-reviewed-fulltext-article-IJWH>

- 1
  - 2
  - 3
  - 4
  - 5
  - 6
  - 7
  - 8
  - 9
  - 10
  - 11
  - 12
  - 13
  - 14
  - 15
  - 16
  - 17
  - 18
  - 19
  - 20
  - 21
  - 22
  - 23
  - 24
  - 25
  - 26
  - 27
  - 28
  - 29
  - 30
  - 31
  - 32
  - 33
  - 34
  - 35
  - 36
  - 37
  - 38
  - 39
  - 40
  - 41
  - 42
  - 43
  - 44
  - 45
  - 46
  - 47
  - 48
  - 49
  - 50
  - 51
  - 52
  - 53
  - 54
  - 55
  - 56
  - 57
  - 58
  - 59
  - 60
41. Levy AT, Singh S, Riley LE, Prabhu M. Acceptance of COVID-19 vaccination in pregnancy: a survey study. *Am J Obstet Gynecol MFM* [Internet]. 2021 Sep;3(5):100399. Available from: <https://linkinghub.elsevier.com/retrieve/pii/S258993332100094X>
42. Mappa I, Luviso M, Distefano FA, Carbone L, Maruotti GM, Rizzo G. Women perception of SARS-CoV-2 vaccination during pregnancy and subsequent maternal anxiety: a prospective observational study. *Journal of Maternal-Fetal and Neonatal Medicine*. 2021;
43. Mohan S, Reagu S, Lindow S, Alabdulla M. COVID-19 vaccine hesitancy in perinatal women: A cross sectional survey. *J Perinat Med*. 2021 Jul 1;49(6):678–85.
44. Nguyen LH, Hoang MT, Nguyen LD, Ninh LT, Nguyen HTT, Nguyen AD, et al. Acceptance and willingness to pay for COVID-19 vaccines among pregnant women in Vietnam. *Tropical Medicine and International Health*. 2021 Oct 1;26(10):1303–13.
45. Oluklu D, Goncu Ayhan S, Menekse Beser D, Uyan Hendem D, Ozden Tokalioglu E, Turgut E, et al. Factors affecting the acceptability of COVID-19 vaccine in the postpartum period. *Hum Vaccin Immunother*. 2021;17(11):4043–7.
46. Perrotta K, Messer A, Alvarado S, Gaudette M, Tran C, Bandoli G. <scp>COVID</scp>-19 vaccine hesitancy and acceptance among pregnant people contacting a teratogen information service. *J Genet Couns* [Internet]. 2022 Jun 28; Available from: <https://onlinelibrary.wiley.com/doi/10.1002/jgc4.1608>
47. Pisula A, Sienicka A, Pawlik KK, Dobrowolska-Redo A, Kacperczyk-Bartnik J, Romejko-Wolniewicz E. Pregnant Women’s Knowledge of and Attitudes towards Influenza Vaccination during the COVID-19 Pandemic in Poland. *Int J Environ Res Public Health* [Internet]. 2022 Apr 8;19(8):4504. Available from: <https://www.mdpi.com/1660-4601/19/8/4504>
48. Redmond ML, Mayes P, Morris K, Ramaswamy M, Ault KA, Smith SA. Learning from maternal voices on COVID-19 vaccine uptake: Perspectives from pregnant women living in the Midwest on the COVID-19 pandemic and vaccine. *J Community Psychol* [Internet]. 2022 Aug 13;50(6):2630–43. Available from: <https://onlinelibrary.wiley.com/doi/10.1002/jcop.22851>
49. Riad A, Jozová A, Üstün B, Lagová E, Hruban L, Janků P, et al. COVID-19 Vaccine Acceptance of Pregnant and Lactating Women (PLW) in Czechia: An Analytical Cross-Sectional Study. *Int J Environ Res Public Health* [Internet]. 2021 Dec 19;18(24):13373. Available from: <https://www.mdpi.com/1660-4601/18/24/13373>
50. Saleh OA, Halperin O. Influenza virus vaccine compliance among pregnant women during the COVID-19 pandemic (pre-vaccine era) in Israel and future intention to uptake BNT162b2 mRNA COVID-19 vaccine. *Vaccine* [Internet]. 2022 Mar;40(13):2099–106. Available from: <https://linkinghub.elsevier.com/retrieve/pii/S0264410X22001608>
51. Samannodi M. COVID-19 vaccine acceptability among women who are pregnant or planning for pregnancy in Saudi Arabia: A cross-sectional study. *Patient Prefer Adherence*. 2021;15:2609–18.
52. Stuckelberger S, Favre G, Ceulemans M, Nordeng H, Gerbier E, Lambelet V, et al. Sars-cov-2 vaccine willingness among pregnant and breastfeeding women during the first pandemic wave: A cross-sectional study in Switzerland. *Viruses*. 2021 Jul 1;13(7).
53. Ward C, Megaw L, White S, Bradfield Z. COVID-19 vaccination rates in an antenatal population: A survey of women’s perceptions, factors influencing vaccine uptake and potential contributors to vaccine hesitancy. *Australian and New Zealand Journal of*

- 1  
2  
3 Obstetrics and Gynaecology [Internet]. 2022 Apr 22; Available from:  
4 <https://onlinelibrary.wiley.com/doi/10.1111/ajo.13532>  
5  
6 54. Waring ME, Pagoto SL, Rudin LR, Ho C, Horkachuck A, Kapoor IA, et al. Factors  
7 associated with mothers' hesitancy to receive a COVID-19 vaccine. *J Behav Med*  
8 [Internet]. 2022 Jan 4; Available from: [https://link.springer.com/10.1007/s10865-021-](https://link.springer.com/10.1007/s10865-021-00268-0)  
9 [00268-0](https://link.springer.com/10.1007/s10865-021-00268-0)  
10  
11 55. Deruelle P, Couffignal C, Sibiude J, Vivanti AJ, Anselem O, Luton D, et al. Prenatal care  
12 providers' perceptions of the SARS-Cov-2 vaccine for themselves and for pregnant  
13 women. *PLoS One*. 2021 Sep 1;16(9 September).  
14  
15 56. Bradfield Z, Wynter K, Hauck Y, Sweet L, Wilson AN, Szabo RA, et al. COVID-19  
16 vaccination perceptions and intentions of maternity care consumers and providers in  
17 Australia. Xie L, editor. *PLoS One* [Internet]. 2021 Nov 15;16(11):e0260049. Available  
18 from: <https://dx.plos.org/10.1371/journal.pone.0260049>  
19  
20 57. Gencer H, Özkan S, Vardar O, Serçekuş P. The effects of the COVID 19 pandemic on  
21 vaccine decisions in pregnant women. *Women and Birth*. 2021;  
22  
23 58. Skirrow H, Barnett S, Bell S, Mounier-Jack S, Kampmann B, Holder B. Women's views  
24 and experiences of accessing pertussis vaccination in pregnancy and infant vaccinations  
25 during the COVID-19 pandemic: A multi-methods study in the UK. *Vaccine* [Internet].  
26 2022 Jul; Available from:  
27 <https://linkinghub.elsevier.com/retrieve/pii/S0264410X22008453>  
28  
29 59. Hahn MB, Fried RL, Cochran P, Eichelberger LP. Evolving perceptions of COVID-19  
30 vaccines among remote Alaskan communities. *Int J Circumpolar Health* [Internet]. 2022  
31 Dec 31;81(1). Available from:  
32 <https://www.tandfonline.com/doi/full/10.1080/22423982.2021.2021684>  
33  
34 60. Maugeri A, Barchitta M, Agodi A. Using Google Trends to Predict COVID-19 Vaccinations  
35 and Monitor Search Behaviours about Vaccines: A Retrospective Analysis of Italian  
36 Data. *Vaccines (Basel)* [Internet]. 2022 Jan 14;10(1):119. Available from:  
37 <https://www.mdpi.com/2076-393X/10/1/119>  
38  
39 61. Marcell L, Dokania E, Navia I, Baxter C, Crary I, Rutz S, et al. One Vax Two Lives: A Social  
40 Media Campaign and Research Program to Address COVID-19 Vaccine Hesitancy in  
41 Pregnancy. *Am J Obstet Gynecol* [Internet]. 2022 Jun; Available from:  
42 <https://linkinghub.elsevier.com/retrieve/pii/S0002937822004768>  
43  
44 62. WHO. WHO ten threats for global health [Internet]. [cited 2022 Jul 15]. Available from:  
45 <https://www.who.int/news-room/spotlight/ten-threats-to-global-health-in-2019>  
46  
47 63. Wilson RJ, Paterson P, Jarrett C, Larson HJ. Understanding factors influencing  
48 vaccination acceptance during pregnancy globally: A literature review. *Vaccine*. 2015  
49 Nov;33(47):6420–9.  
50  
51 64. Troiano G, Nardi A. Vaccine hesitancy in the era of COVID-19. *Public Health*. 2021  
52 May;194:245–51.  
53  
54 65. Dubé E, Gagnon D, Kaminsky K, Green CR, Ouakki M, Bettinger JA, et al. Vaccination  
55 during pregnancy: Canadian maternity care providers' opinions and practices. *Hum*  
56 *Vaccin Immunother*. 2020;16(11):2789–99.  
57  
58 66. Al-Zalfawi SM, Rabbani SI, Asdaq SMB, Alamri AS, Alsanie WF, Alhomrani M, et al. Public  
59 knowledge, attitude, and perception towards COVID-19 vaccination in Saudi Arabia. *Int*  
60 *J Environ Res Public Health*. 2021 Oct 1;18(19).



## Preferred Reporting Items for Systematic reviews and Meta-Analyses extension for Scoping Reviews (PRISMA-ScR) Checklist

| SECTION                           | ITEM | PRISMA-ScR CHECKLIST ITEM                                                                                                                                                                                                                                                                                  | REPORTED ON PAGE #                    |
|-----------------------------------|------|------------------------------------------------------------------------------------------------------------------------------------------------------------------------------------------------------------------------------------------------------------------------------------------------------------|---------------------------------------|
| <b>TITLE</b>                      |      |                                                                                                                                                                                                                                                                                                            |                                       |
| Title                             | 1    | Identify the report as a scoping review.                                                                                                                                                                                                                                                                   | p. 1                                  |
| <b>ABSTRACT</b>                   |      |                                                                                                                                                                                                                                                                                                            |                                       |
| Structured summary                | 2    | Provide a structured summary that includes (as applicable): background, objectives, eligibility criteria, sources of evidence, charting methods, results, and conclusions that relate to the review questions and objectives.                                                                              | p. 2-3                                |
| <b>INTRODUCTION</b>               |      |                                                                                                                                                                                                                                                                                                            |                                       |
| Rationale                         | 3    | Describe the rationale for the review in the context of what is already known. Explain why the review questions/objectives lend themselves to a scoping review approach.                                                                                                                                   | p. 4-5                                |
| Objectives                        | 4    | Provide an explicit statement of the questions and objectives being addressed with reference to their key elements (e.g., population or participants, concepts, and context) or other relevant key elements used to conceptualize the review questions and/or objectives.                                  | p. 5                                  |
| <b>METHODS</b>                    |      |                                                                                                                                                                                                                                                                                                            |                                       |
| Protocol and registration         | 5    | Indicate whether a review protocol exists; state if and where it can be accessed (e.g., a Web address); and if available, provide registration information, including the registration number.                                                                                                             | Supplementary file 2 (not registered) |
| Eligibility criteria              | 6    | Specify characteristics of the sources of evidence used as eligibility criteria (e.g., years considered, language, and publication status), and provide a rationale.                                                                                                                                       | p. 6                                  |
| Information sources*              | 7    | Describe all information sources in the search (e.g., databases with dates of coverage and contact with authors to identify additional sources), as well as the date the most recent search was executed.                                                                                                  | p. 6                                  |
| Search                            | 8    | Present the full electronic search strategy for at least 1 database, including any limits used, such that it could be repeated.                                                                                                                                                                            | Supplementary file 3                  |
| Selection of sources of evidence† | 9    | State the process for selecting sources of evidence (i.e., screening and eligibility) included in the scoping review.                                                                                                                                                                                      | p. 6                                  |
| Data charting process‡            | 10   | Describe the methods of charting data from the included sources of evidence (e.g., calibrated forms or forms that have been tested by the team before their use, and whether data charting was done independently or in duplicate) and any processes for obtaining and confirming data from investigators. | Supplementary file 2                  |
| Data items                        | 11   | List and define all variables for which data were sought and any assumptions and simplifications made.                                                                                                                                                                                                     | p. 6                                  |
| Critical appraisal of individual  | 12   | If done, provide a rationale for conducting a critical appraisal of included sources of evidence; describe                                                                                                                                                                                                 | NA                                    |

| SECTION                                       | ITEM | PRISMA-ScR CHECKLIST ITEM                                                                                                                                                                       | REPORTED ON PAGE #   |
|-----------------------------------------------|------|-------------------------------------------------------------------------------------------------------------------------------------------------------------------------------------------------|----------------------|
| sources of evidence§                          |      | the methods used and how this information was used in any data synthesis (if appropriate).                                                                                                      |                      |
| Synthesis of results                          | 13   | Describe the methods of handling and summarizing the data that were charted.                                                                                                                    | Supplementary file 2 |
| <b>RESULTS</b>                                |      |                                                                                                                                                                                                 |                      |
| Selection of sources of evidence              | 14   | Give numbers of sources of evidence screened, assessed for eligibility, and included in the review, with reasons for exclusions at each stage, ideally using a flow diagram.                    | p. 7-8, p. 12        |
| Characteristics of sources of evidence        | 15   | For each source of evidence, present characteristics for which data were charted and provide the citations.                                                                                     | p. 9-11              |
| Critical appraisal within sources of evidence | 16   | If done, present data on critical appraisal of included sources of evidence (see item 12).                                                                                                      | NA                   |
| Results of individual sources of evidence     | 17   | For each included source of evidence, present the relevant data that were charted that relate to the review questions and objectives.                                                           | p. 7-15              |
| Synthesis of results                          | 18   | Summarize and/or present the charting results as they relate to the review questions and objectives.                                                                                            | p. 9-11              |
| <b>DISCUSSION</b>                             |      |                                                                                                                                                                                                 |                      |
| Summary of evidence                           | 19   | Summarize the main results (including an overview of concepts, themes, and types of evidence available), link to the review questions and objectives, and consider the relevance to key groups. | p. 16-18             |
| Limitations                                   | 20   | Discuss the limitations of the scoping review process.                                                                                                                                          | p. 19                |
| Conclusions                                   | 21   | Provide a general interpretation of the results with respect to the review questions and objectives, as well as potential implications and/or next steps.                                       | p. 19                |
| <b>FUNDING</b>                                |      |                                                                                                                                                                                                 |                      |
| Funding                                       | 22   | Describe sources of funding for the included sources of evidence, as well as sources of funding for the scoping review. Describe the role of the funders of the scoping review.                 | p. 19                |

JBI = Joanna Briggs Institute; PRISMA-ScR = Preferred Reporting Items for Systematic reviews and Meta-Analyses extension for Scoping Reviews.

\* Where *sources of evidence* (see second footnote) are compiled from, such as bibliographic databases, social media platforms, and Web sites.

† A more inclusive/heterogeneous term used to account for the different types of evidence or data sources (e.g., quantitative and/or qualitative research, expert opinion, and policy documents) that may be eligible in a scoping review as opposed to only studies. This is not to be confused with *information sources* (see first footnote).

‡ The frameworks by Arksey and O'Malley (6) and Levac and colleagues (7) and the JBI guidance (4, 5) refer to the process of data extraction in a scoping review as data charting.

§ The process of systematically examining research evidence to assess its validity, results, and relevance before using it to inform a decision. This term is used for items 12 and 19 instead of "risk of bias" (which is more applicable to systematic reviews of interventions) to include and acknowledge the various sources of evidence that may be used in a scoping review (e.g., quantitative and/or qualitative research, expert opinion, and policy document).

From: Tricco AC, Lillie E, Zarin W, O'Brien KK, Colquhoun H, Levac D, et al. PRISMA Extension for Scoping Reviews (PRISMA-ScR): Checklist and Explanation. *Ann Intern Med.* 2018;169:467–473. doi: 10.7326/M18-0850.

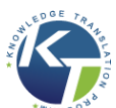

St. Michael's

Inspired Care.  
Inspiring Science.

For peer review only - <http://bmjopen.bmj.com/site/about/guidelines.xhtml>

15/11/2021 v3

## RESEARCH PROTOCOL

# The influence of the COVID-19 pandemic and social media on behaviour of pregnant and lactating women towards vaccination: a scoping review

Larissa De Brabandere<sup>1</sup>, Greet Hendrickx<sup>1</sup>, Karolien Poels<sup>2</sup>, Walter Daelemans<sup>3</sup>, Pierre Van Damme<sup>1</sup>, Kirsten Maertens<sup>1</sup>

<sup>1</sup> Centre for the Evaluation of Vaccination, Vaccine & Infectious Diseases Institute, University of Antwerp, Antwerp, Belgium

<sup>2</sup> Media, ICT & Organizations and Society, Department of Communication Studies, University of Antwerp, Antwerp, Belgium

<sup>3</sup> CLiPS, Department for Linguistics, University of Antwerp, Antwerp, Belgium

### Background

In March 2020, the World Health Organization (WHO) announced that the COVID-19 outbreak, caused by the SARS-CoV-2 virus, could be characterized as a pandemic. As of November 8<sup>th</sup> 2021, there have been >400 million confirmed COVID-19 cases and almost 6 million COVID-19 confirmed deaths worldwide. Similar to other populations, pregnant and lactating women can encounter SARS-CoV-2 and might contract COVID-19. SARS-CoV-2 infection during pregnancy is associated with increased rates of stillbirth, preterm birth, pre-eclampsia and caesarian delivery. Furthermore, pregnant women are at increased risk of hospitalization, admission to intensive care unit and death compared to non- pregnant women (1,2). If breastfeeding women contract COVID-19, they can become seriously ill impeding them from continuing breastfeeding. Besides, they can transmit the disease via droplet transmission to their newborn child (3).

One of the most important approaches to control the ongoing pandemic is COVID-19 vaccination. Since the beginning of 2021, several COVID-19 vaccines have been licensed and

15/11/2021 v3

1  
2  
3 implemented worldwide. Since pregnant and lactating women were initially not included in  
4 pre-marketing clinical trials, many questions rose about development, safety, immunogenicity  
5 and effectiveness of COVID-19 vaccines in these target groups. Although there was absence  
6 of data on safety and efficacy of COVID-19 vaccines during pregnancy or lactation, several  
7 countries started to recommend vaccination in these target groups (4).  
8  
9  
10  
11  
12

13  
14 The COVID-19 pandemic and its accompanying vaccination campaign led to an abundance of  
15 misinformation about vaccination on the Internet (5). Fake news that has circulated about  
16 COVID-19 vaccination in pregnant women, women of childbearing age and lactating women  
17 included: 1. COVID-19 vaccination could cause infertility 2. there is an increased risk of  
18 miscarriage/stillbirth after receiving a COVID-19 vaccine while pregnant 3. it is unsafe for  
19 breastfeeding women to receive a COVID-19 vaccine (6). These myths can feed vaccine  
20 hesitancy in this important target group. Since the World Health Organization (WHO)  
21 described in 2019 vaccine hesitancy as one of the top 10 global health threats (7), it is  
22 important to tackle these obstacles and to improve vaccine uptake.  
23  
24  
25  
26  
27  
28  
29  
30  
31

32 To set up right interventions to improve vaccine confidence, it is necessary to determine the  
33 factors that influence vaccine decision-making in pregnant and lactating women. The  
34 systematic review of Kilich et al. describes determinants that influence vaccine confidence  
35 among pregnant women (8). However, this study is limited to pre-pandemic information, does  
36 not include lactating women and does not focus on social media.  
37  
38  
39  
40  
41  
42

### 43 **Research question**

44  
45 What is the impact of the COVID-19 pandemic and social media on vaccine confidence in  
46 pregnant and lactating women?  
47  
48  
49

### 50 **Objectives**

- 51 1. Comparing vaccine confidence in pregnant and lactating women before and after the  
52 COVID-19 pandemic.
- 53 2. Describing vaccine willingness towards COVID-19 vaccination in pregnant and lactating  
54 women.  
55  
56  
57  
58  
59  
60

15/11/2021 v3

3. Determination of factors linked to vaccine (un)willingness towards COVID-19 vaccination in pregnant and lactating women.
4. Appraise the impact of social media on vaccine confidence in pregnant and lactating women.

## Methods

We propose to answer the research question above by conducting a scoping review following the PRISMA guidelines. The study will begin November 2021 and will be finished as soon as possible (before end of December 2021).

### Search strategy

The review will be conducted by doing a literature study. First, grey literature will be searched. This search includes a general web search on Google (limited to the first 50 results) and Google Scholar (limited to the first 200 results). Search terms will be adjusted and refined based on the number and types of relevant hits. If there is a relevant publication found, it will be considered for inclusion.

PubMed will be used as database to search literature. Due to time pressure, only one database will be searched. Since PubMed gives access to three components (MEDLINE, PubMed Central and Bookshelf) and contains more than 34 million citations and abstracts of biomedical literature and life sciences, this database is selected.

### Inclusion and exclusion criteria

All articles, without language restriction, published from November 22<sup>nd</sup> 2018 (since Kilich et al. searched all articles by November 22<sup>nd</sup> 2018) related to the research question will be included.

Following criteria will lead to exclusion:

1. Reviews
2. Articles whose focus is not our target population (pregnant and lactating women)
3. Abstracts, no full text available

15/11/2021 v3

- 1  
2  
3 4. Articles describing outcomes of COVID-19 infection or COVID-19 vaccination in  
4 pregnant and lactating women.  
5  
6  
7

8  
9 Data charting

10 Included articles will be abstracted and synthesized by one reviewer following the procedure  
11 described below. Verification will be done by a second reviewer. Disagreements will be  
12 addressed through discussion between the reviewers and the other researchers.  
13  
14  
15  
16

17  
18 Synthesis of included articles:

19 a. Study characteristics

- 20  
21 i. Author(s)  
22  
23 ii. Year of publication  
24  
25 iii. Year the study was conducted  
26  
27 iv. Type of publication (e.g. clinical trial, survey,...)  
28  
29 v. Publication title  
30  
31 vi. Journal in which study is published  
32  
33 vii. Country of publication  
34  
35 viii. Language of dissemination  
36  
37 ix. Topic of the study

38 b. Study methods

- 39  
40 i. Study location (country, city)  
41  
42 ii. Study design  
43  
44 iii. Study population  
45  
46 iv. Study sample size (N= xxx)  
47  
48 v. Follow-up time / timing of the study

49 c. Results

- 50  
51 i. COVID-19 vaccine coverage (N= xxx)  
52  
53 ii. COVID-19 vaccine willingness (N= xxx)  
54  
55 iii. Factors influencing COVID-19 vaccine willingness  
56  
57 iv. Vaccine coverage other than COVID-19 (N= xxx)  
58  
59 v. Vaccine willingness other than COVID-19 (N= xxx)  
60  
vi. Social media platforms described

15/11/2021 v3

vii. Influence of social media

d. Quality of the study

i. Strengths

ii. Limitations

iii. Bias (selection / performance / performance / attrition / reporting / other)

## References

1. Chmielewska B, Barratt I, Townsend R, Kalafat E, van der Meulen J, Gurol-Urganci I, et al. Effects of the COVID-19 pandemic on maternal and perinatal outcomes: a systematic review and meta-analysis. *Lancet Glob Health*. 2021 Jun 1;9(6):e759–72.
2. Wei SQ, Bilodeau-Bertrand M, Liu S, Auger N. The impact of COVID-19 on pregnancy outcomes: A systematic review and meta-analysis. Vol. 193, *CMAJ*. Canadian Medical Association; 2021. p. E540–8.
3. Bhatt H. Should COVID-19 Mother Breastfeed her Newborn Child? A Literature Review on the Safety of Breastfeeding for Pregnant Women with COVID-19. Available from: <https://doi.org/10.1007/s13668-020-00343-z>
4. COVID-19 vaccine policies on pregnancy and lactation [Internet]. [cited 2021 Nov 8]. Available from: <https://www.comitglobal.org/explore/public-health-authorities/pregnancy>
5. Ennab F, Babar MS, Khan AR, Mittal RJ, Nawaz FA, Essar MY, et al. Implications of social media misinformation on COVID-19 vaccine confidence among pregnant women in Africa. *Clin Epidemiol Glob Health* [Internet]. 2022 Mar;14:100981. Available from: <https://linkinghub.elsevier.com/retrieve/pii/S2213398422000215>
6. Covid vaccine misinformation still fuels fears surrounding pregnancy, a new study finds. [Internet]. [cited 2021 Nov 8]. Available from: <https://www.nytimes.com/2022/06/03/health/covid-vaccine-pregnancy-misinformation.html>
7. WHO. WHO ten threats for global health [Internet]. [cited 2022 Jul 15]. Available from: <https://www.who.int/news-room/spotlight/ten-threats-to-global-health-in-2019>
8. Kilich E, Dada S, Francis MR, Tazare J, Chico RM, Paterson P, et al. Factors that influence vaccination decisionmaking among pregnant women: A systematic review and meta-analysis. *PLoS One*. 2020 Jul 1;15(7 July 2020).

### Supplementary file 3: full search strategy

Database: PubMed

Date searched: 18<sup>th</sup> July 2022

Filters used: from 2018/11/23 – 2022/7/18 (present day)

Results: 477 results

| Query                                                                                                                                                                                                                                                                                                                                                                                                                                                                                                                                                                                                                                                                                                                                                                                                                                                                                                                                                                                                                                                                                                               | Results |
|---------------------------------------------------------------------------------------------------------------------------------------------------------------------------------------------------------------------------------------------------------------------------------------------------------------------------------------------------------------------------------------------------------------------------------------------------------------------------------------------------------------------------------------------------------------------------------------------------------------------------------------------------------------------------------------------------------------------------------------------------------------------------------------------------------------------------------------------------------------------------------------------------------------------------------------------------------------------------------------------------------------------------------------------------------------------------------------------------------------------|---------|
| Search: (((((Vaccin* OR Immuniz* OR immunis* OR antibodies OR immune response)))) AND (((confidence OR awareness OR attitude* OR anxiety OR trust* OR intent* OR dilemma OR perception* OR misconception* OR behaviour OR behavior OR anti-vaccin* OR decision making OR vaccination refusal OR fear* OR distrust OR mistrust OR hesitancy OR controvers* OR belief* OR criticis* OR misinformation OR intent* OR choice* OR concern* OR knowledge OR acceptance OR willingness OR uptake OR barrier* OR disinformation OR complacency OR fake news)))) AND (((pregnan* OR maternal OR prenatal OR antenatal OR parent* OR lactating* OR lactation OR breast milk OR breastfeeding))) AND ((social media OR internet OR website* OR communication* OR social network* social behavior OR social behaviour OR message* OR forum OR fora OR blog* OR discussion group* OR online OR Facebook OR Twitter OR Pinterest OR LinkedIn OR Instagram OR Reddit OR Youtube OR Messenger OR Whatsapp OR Telegram)) AND (COVID* OR SARS-CoV-2 OR COVID19* OR corona*) Filters: from 2018/11/23 - 2022/7/18 Sort by: Most Recent | 477     |

The database was searched without language restrictions. The languages used within the 477 records were French, German and English. Since the authors are educated in these languages, this formed no issue.



# BMJ Open

## The influence of the COVID-19 pandemic and social media on the behaviour of pregnant and lactating women towards vaccination: a scoping review

|                                 |                                                                                                                                                                                                                                                                                                                                                                                                                                                                                                                                                                                                                                                                                                                                                                                                                                                                                                    |
|---------------------------------|----------------------------------------------------------------------------------------------------------------------------------------------------------------------------------------------------------------------------------------------------------------------------------------------------------------------------------------------------------------------------------------------------------------------------------------------------------------------------------------------------------------------------------------------------------------------------------------------------------------------------------------------------------------------------------------------------------------------------------------------------------------------------------------------------------------------------------------------------------------------------------------------------|
| Journal:                        | <i>BMJ Open</i>                                                                                                                                                                                                                                                                                                                                                                                                                                                                                                                                                                                                                                                                                                                                                                                                                                                                                    |
| Manuscript ID                   | bmjopen-2022-066367.R2                                                                                                                                                                                                                                                                                                                                                                                                                                                                                                                                                                                                                                                                                                                                                                                                                                                                             |
| Article Type:                   | Original research                                                                                                                                                                                                                                                                                                                                                                                                                                                                                                                                                                                                                                                                                                                                                                                                                                                                                  |
| Date Submitted by the Author:   | 19-Jan-2023                                                                                                                                                                                                                                                                                                                                                                                                                                                                                                                                                                                                                                                                                                                                                                                                                                                                                        |
| Complete List of Authors:       | De Brabandere, Larissa; University of Antwerp Faculty of Medicine and Health Sciences, Centre for the Evaluation of Vaccination, Vaccine & Infectious Diseases Institute<br>Hendrickx, Greet; University of Antwerp Faculty of Medicine and Health Sciences, Centre for the Evaluation of Vaccination, Vaccine & Infectious Diseases Institute<br>Poels, Karolien; University of Antwerp, Media, ICT & Organizations and Society, Department of Communication Sciences<br>Daelemans, Walter; University of Antwerp, CLiPS, Department of Linguistics<br>Van Damme, Pierre; University of Antwerp Faculty of Medicine and Health Sciences, Centre for the Evaluation of Vaccination, Vaccine & Infectious Diseases Institute<br>Maertens, Kirsten; University of Antwerp Faculty of Medicine and Health Sciences, Centre for the Evaluation of Vaccination, Vaccine & Infectious Diseases Institute |
| <b>Primary Subject Heading</b>: | Public health                                                                                                                                                                                                                                                                                                                                                                                                                                                                                                                                                                                                                                                                                                                                                                                                                                                                                      |
| Secondary Subject Heading:      | Infectious diseases, Obstetrics and gynaecology                                                                                                                                                                                                                                                                                                                                                                                                                                                                                                                                                                                                                                                                                                                                                                                                                                                    |
| Keywords:                       | COVID-19, Public health < INFECTIOUS DISEASES, PREVENTIVE MEDICINE                                                                                                                                                                                                                                                                                                                                                                                                                                                                                                                                                                                                                                                                                                                                                                                                                                 |
|                                 |                                                                                                                                                                                                                                                                                                                                                                                                                                                                                                                                                                                                                                                                                                                                                                                                                                                                                                    |

SCHOLARONE™  
Manuscripts



I, the Submitting Author has the right to grant and does grant on behalf of all authors of the Work (as defined in the below author licence), an exclusive licence and/or a non-exclusive licence for contributions from authors who are: i) UK Crown employees; ii) where BMJ has agreed a CC-BY licence shall apply, and/or iii) in accordance with the terms applicable for US Federal Government officers or employees acting as part of their official duties; on a worldwide, perpetual, irrevocable, royalty-free basis to BMJ Publishing Group Ltd ("BMJ") its licensees and where the relevant Journal is co-owned by BMJ to the co-owners of the Journal, to publish the Work in this journal and any other BMJ products and to exploit all rights, as set out in our [licence](#).

The Submitting Author accepts and understands that any supply made under these terms is made by BMJ to the Submitting Author unless you are acting as an employee on behalf of your employer or a postgraduate student of an affiliated institution which is paying any applicable article publishing charge ("APC") for Open Access articles. Where the Submitting Author wishes to make the Work available on an Open Access basis (and intends to pay the relevant APC), the terms of reuse of such Open Access shall be governed by a Creative Commons licence – details of these licences and which [Creative Commons](#) licence will apply to this Work are set out in our licence referred to above.

Other than as permitted in any relevant BMJ Author's Self Archiving Policies, I confirm this Work has not been accepted for publication elsewhere, is not being considered for publication elsewhere and does not duplicate material already published. I confirm all authors consent to publication of this Work and authorise the granting of this licence.

1  
2  
3 **The influence of the COVID-19 pandemic and social media on the**  
4 **behaviour of pregnant and lactating women towards vaccination: a**  
5 **scoping review**  
6  
7  
8  
9

10 Larissa De Brabandere<sup>1</sup>, Greet Hendrickx<sup>1</sup>, Karolien Poels<sup>2</sup>, Walter Daelemans<sup>3</sup>, Pierre Van  
11  
12 Damme<sup>1</sup>, Kirsten Maertens<sup>1</sup>  
13  
14  
15  
16

17 <sup>1</sup> Centre for the Evaluation of Vaccination, Vaccine & Infectious Diseases Institute, University of  
18 Antwerp, Antwerp, Belgium  
19

20 <sup>2</sup> Media, ICT & Organizations and Society, Department of Communication Studies, University of  
21 Antwerp, Antwerp, Belgium  
22  
23

24 <sup>3</sup> CLiPS, Department for Linguistics, University of Antwerp, Antwerp, Belgium  
25  
26  
27  
28  
29  
30

31 Corresponding author:

32  
33 Kirsten Maertens, PhD, Prof

34  
35 Centre for the Evaluation of Vaccination, Vaccine & Infectious Diseases Institute, University of  
36 Antwerp, Belgium  
37

38  
39 Mail: [kirsten.maertens@uantwerpen.be](mailto:kirsten.maertens@uantwerpen.be)  
40

41  
42 Alternate corresponding author:

43  
44 Larissa De Brabandere, MD

45  
46 Centre for the Evaluation of Vaccination, Vaccine & Infectious Diseases Institute, University of  
47 Antwerp, Belgium  
48

49  
50 Mail: [larissa.debrabandere@uantwerpen.be](mailto:larissa.debrabandere@uantwerpen.be)  
51  
52  
53  
54

55 Abstract : 298 words

56  
57 Article : 4,107 words

58  
59  
60 References : 66

## Abstract

**BACKGROUND** Pregnant women, foetuses and infants are at risk of infectious disease-related complications. Maternal vaccination is a strategy developed to better protect pregnant women and their offspring against infectious disease-related morbidity and mortality. Vaccines against influenza, pertussis and recently also COVID-19 are widely recommended for pregnant women. Yet, there is still a significant amount of hesitation towards maternal vaccination policies. Furthermore, contradictory messages circulating social media impact vaccine confidence.

**OBJECTIVES** This scoping review aims to reveal how COVID-19 and COVID-19 vaccination impacted vaccine confidence in pregnant and lactating women. Additionally, this review studied the role social media plays in creating opinions towards vaccination in these target groups.

**ELIGIBILITY CRITERIA** Articles published between 23 November 2018 and 18 July 2022 that are linked to the objectives of this review were included. Reviews, articles not focusing on the target group, abstracts, articles describing outcomes of COVID-19 infection/COVID-19 vaccination were excluded.

**SOURCES OF EVIDENCE** The PubMed database was searched to select articles. Search terms used were linked to pregnancy, lactation, vaccination, vaccine hesitancy, COVID-19 and social media.

**CHARTING METHODS** Included articles were abstracted and synthesized by one reviewer. Verification was done by a second reviewer. Disagreements were addressed through discussion between reviewers and other researchers.

**RESULTS** Pregnant and lactating women are generally less likely to accept a COVID-19 vaccine compared to non-pregnant and non-nursing women. The main reason to refuse maternal vaccination is safety concerns. A positive link was detected between COVID-19 vaccine willingness and acceptance of other vaccines during pregnancy. The Internet and social media are identified as important information sources for maternal vaccination.

**DISCUSSION & CONCLUSION** Vaccine hesitancy in pregnant and lactating women remains an important issue, expressing the need for effective interventions to increase vaccine confidence and coverage. The role social media plays in vaccine uptake remains unclear.

### Strengths and limitations

- A concrete research question with targeted search terms was used to complete this review.
- The search was limited to one database (PubMed) which could have led to missing out on important studies not included in the searched database.
- The search was not systematic since timing to perform the review was limited (within the VCF project).
- This scoping review followed the PRISMA guidelines for scoping reviews.

## Introduction

Several infectious diseases are associated with adverse outcomes in pregnant women, foetuses and infants. Therefore, a strategy which has gained interest in recent years is vaccination during pregnancy as well as during lactation, as a means to reduce infectious disease-related morbidity and mortality in these target populations (1–3).

Pregnant women who contract influenza have an increased risk of influenza-related complications and hospitalisation compared to non-pregnant women (2,4). In addition, influenza infections during pregnancy are linked to an increased risk of preterm delivery and small-for-gestational-age infants. Infants younger than six months of age are at high risk of having severe influenza-related complications, often associated with hospitalisation and mortality (2).

Another infectious disease that forms a serious threat for neonates is pertussis, of which the disease burden and case fatality rate is highest in the first year of life (5,6).

A COVID-19 infection during pregnancy is linked to an increased risk of hospitalisation, admission to an intensive care unit and death in pregnant women (7,8). Several studies have also found that there is a higher risk of preterm delivery, stillbirth and pre-eclampsia (7,9,10). Furthermore, low birth weight, foetal distress and other respiratory symptoms are more frequent in neonates born to a mother who experienced a COVID-19 infection (7,10). Infants infected with COVID-19 in the postpartum period can become critically ill (11).

To better protect pregnant women, foetuses and infants against infectious disease-related complications, vaccination during pregnancy is an important strategy. Public health authorities worldwide have already implemented this approach for influenza and pertussis, while recently also adding vaccination against COVID-19 (5,12–15).

Vaccination during pregnancy induces vaccine-specific antibodies that protect pregnant women against severe illness. Subsequently, these vaccine-induced antibodies are transferred from mother to baby across the placenta during pregnancy and via breastfeeding after birth (12). Therefore, if women did not receive a pertussis and/or influenza vaccine during pregnancy or are not yet fully vaccinated against COVID-19 with the advised vaccine doses, it is recommended to vaccinate in the postpartum period (16,17).

1  
2  
3 Despite the proven benefits of vaccination during pregnancy and lactation and the  
4 implementation of the vaccination strategy on a broad scale, there is still a significant amount  
5 of hesitation towards maternal vaccination policies. This is reflected by poor vaccine uptake  
6 in different regions and varying or lacking maternal vaccination programmes and  
7 recommendations in various countries (12,13,18,19). A previous systematic review (20),  
8 conducted before the start of the COVID-19 pandemic, defined factors that could possibly  
9 influence vaccination decision-making among pregnant women. The most important factor  
10 was found to be the recommendation from a healthcare provider (HCP) to vaccinate during  
11 pregnancy. However, other determinants such as previous vaccination behaviour and vaccine-  
12 specific factors could negate the recommendation from a HCP. This work also found that  
13 pregnant women used the Internet or other media to search for information about  
14 vaccination, but these women did not perceive these channels to be the most trustworthy  
15 sources (20).  
16  
17  
18  
19  
20  
21  
22  
23  
24  
25  
26  
27  
28

29 With the still ongoing COVID-19 pandemic and the licensing of COVID-19 vaccines, debates  
30 around vaccination flared up again. Pregnant and lactating women were initially excluded  
31 from pre-marketing clinical trials for licensing of COVID-19 vaccines, which resulted in doubts  
32 about safety, immunogenicity and the efficacy of the vaccines in these target groups.  
33 However, based on evidence from other vaccines already administered to pregnant and  
34 lactating women, no safety or efficacy issues were expected. After weighing the benefits of  
35 vaccination against the complications of disease, different countries immediately started to  
36 approve COVID-19 vaccination for these groups. Different opinions, scientifically-based or not,  
37 were shared via all sorts of social media, both by the general public and by HCPs. The aim of  
38 this scoping review is to give a post-pandemic update of the pre-pandemic systematic review  
39 mentioned above (20). The research tries to reveal how COVID-19 and its accompanying  
40 vaccination campaign impacted vaccine confidence in pregnant and lactating women.  
41 Additionally, this review intends to identify additional factors related to vaccine decision-  
42 making in lactating women. Furthermore, the role social media plays in creating opinions  
43 towards vaccination during pregnancy and/or lactation is studied.  
44  
45  
46  
47  
48  
49  
50  
51  
52  
53  
54  
55  
56  
57  
58  
59  
60

## Methods

This scoping review was conducted following the PRISMA guidelines (Supplementary file 1). First, a research protocol was written and grey literature was searched (Supplementary file 2). Scientific literature was found by searching the PubMed database, without language restrictions. Keywords were identified based on the previous systematic review (20) and additional search terms linked to social media and COVID-19 were added:

vaccin\*, immuniz\*, immunis\*, antibodies, immune response, confidence, awareness, attitude\*, anxiety, trust\*, intent\*, dilemma, perception\*, misconception\*, behaviour, behavior, anti-vaccin\*, decision-making, vaccination refusal, fear\*, distrust, mistrust, hesitancy, controversies\*, belief\*, criticis\*, misinformation, intent\*, choice\*, concern\*, knowledge, acceptance, willingness, uptake, barrier\*, disinformation, complacency, fake news, pregnan\*, maternal, prenatal, antenatal, parent\*, lactating\*, lactation, breast milk, breastfeeding, social media, internet, website\*, communication\*, social network\*, social behavior, social behaviour, message\*, forum, fora, blog\*, discussion group\*, online, Facebook, Twitter, Pinterest, LinkedIn, Instagram, Reddit, YouTube, Messenger, WhatsApp, Telegram, COVID\*, SARS-CoV-2, COVID19\*, corona\*.

Publication dates were limited starting from 23 November 2018 since the pre-pandemic systematic review (20) covered articles published until 22 November 2018. The search was done on 18 July 2022 (Supplementary file 3).

Overall, 477 records were identified in the PubMed search. All records were screened by title and abstract, from which 46 were retained to screen by full text. Articles that did not mention pregnant and/or lactating women, the COVID-19 pandemic or vaccination and/or social media were excluded. Also, reviews and abstracts without full text were not included. If the article focused on outcomes of a COVID-19 infection or COVID-19 vaccination during pregnancy/lactation, the article was rejected. Finally, after screening by full text, 37 records were selected to be included in this scoping review. Screening the references of the selected records – known as ‘the snowball search method’ or ‘snowballing’ – yielded two additional articles.

### *Patient and public involvement*

We did not involve patients/the public in the design or conduct of our study.



## Results

### 1. COVID-19 VACCINE ACCEPTANCE IN PREGNANT AND LACTATING WOMEN AND WOMEN PLANNING TO BE PREGNANT

In total, 32 articles about willingness to get vaccinated against COVID-19 during pregnancy, lactation and when planning to get pregnant were identified and included in this review. A summary of the selected articles can be found in Table 1.

#### 1.1. *COVID-19 vaccine confidence in pregnant women and women planning to be pregnant*

Several studies were conducted on vaccine willingness in pregnant women before the availability of COVID-19 vaccines (N= 12). In four of these studies pregnant women were less likely to accept a future COVID-19 vaccine (29.7%-62.1%) compared to breastfeeding women (38.6%-69.0%) and non-pregnant women (73.4%-81.2%) (21–24). In contrast, one study found that more pregnant women (65.9%) were willing to get vaccinated against COVID-19 compared to non-pregnant women (59.6%), although the difference was not significant (25). In addition, a high COVID-19 vaccine acceptance rate in pregnant women in China was detected (77.4%) (26). Furthermore, willingness to get vaccinated during pregnancy varied greatly by country: COVID-19 vaccine readiness level was above 80.0% for pregnant women in India and Mexico and lower than 45.0% in Russia, Australia and the USA (22). In a study where six European countries were compared, the highest COVID-19 vaccine willingness during pregnancy was seen in Belgium (78.1%), whereas the lowest rate was found in Switzerland (29.7%) (21).

Twenty surveys were performed after licensure of COVID-19 vaccines, but some were conducted before the World Health Organization (WHO) and/or national authorities officially recommended vaccinating all pregnant women against COVID-19. A survey study conducted at the New York Presbyterian Hospital (USA) concluded that pregnant women - at that moment - were still less likely to accept a COVID-19 vaccine (44.3%) compared to breastfeeding (55.2%) and non-pregnant women (76.2%) (27). Another survey study conducted in Saudi Arabia made the same significant conclusion for pregnant women and women planning to get pregnant compared to non-pregnant women and women not planning

1  
2  
3 to get pregnant (28). A study performed in January 2021 in the USA divided the responders  
4 into two groups: i.e. (1) female HCPs preventing pregnancy and (2) female HCPs who are  
5 pregnant/lactating/attempting pregnancy. The research found a significant difference in  
6 vaccine willingness between both groups where group (1) significantly desired more to receive  
7 the vaccine compared to group (2) (29). Thirteen studies also mentioned COVID-19 vaccine  
8 coverage rates in pregnant women. Two studies measured the COVID-19 vaccine coverage in  
9 pregnant women during the same time period (March-April 2021) in two different countries:  
10 Germany (30) and the USA (31). A remarkable difference in coverage between both studies  
11 was observed: 2.4% in Germany versus 21.7% in the USA (30,31).  
12  
13  
14  
15  
16  
17  
18  
19  
20

### 21 1.2. COVID-19 vaccine confidence in lactating women

22  
23 Fifteen studies included lactating/postpartum women in their study population of which three  
24 studies found that lactating women were more likely to accept a COVID-19 vaccine (39.4%-  
25 69.0%) compared to pregnant women (13.8%-61.0%) (21,27,30). Nevertheless, lactating  
26 women remain less willing to receive a COVID-19 vaccine than non-pregnant and non-nursing  
27 women (27). In an American follow-up study, 35.0% of postpartum women were willing to be  
28 vaccinated compared to only 14.0% of pregnant women. However, the breastfeeding status  
29 of the postpartum women was not clear (32). Another study from the USA found that women  
30 currently nursing or planning to breastfeed were less willing to receive a COVID-19 vaccine  
31 compared to women who were not (33). As for pregnant women, the acceptance rate widely  
32 varies among different countries with a 79.2% acceptance rate in Belgium compared to 38.6%  
33 in Switzerland (21).  
34  
35  
36  
37  
38  
39  
40  
41  
42  
43  
44  
45  
46  
47  
48  
49  
50  
51  
52  
53  
54  
55  
56  
57  
58  
59  
60

**Table 1: Overview of studies analysing vaccine confidence in COVID-19 vaccines of pregnant / lactating women**

| Authors (year of publication) | Reference | Study period              | Country                                       | Study design     | N° of participants                                                                                                                                                   | COVID-19 vaccine coverage              | COVID-19 vaccine willingness                                                                 |
|-------------------------------|-----------|---------------------------|-----------------------------------------------|------------------|----------------------------------------------------------------------------------------------------------------------------------------------------------------------|----------------------------------------|----------------------------------------------------------------------------------------------|
| Abuhammad (2022)              | (34)      | Sept 2021 – Oct 2021      | Jordan                                        | Survey           | 414 participants:<br>195 pregnant women<br>218 lactating women                                                                                                       | 50.8% of pregnant and lactating women  | NA                                                                                           |
| Ceulemans et al. (2021)       | (21)      | 16 Jun 2020 – 14 Jul 2020 | Ireland, Norway, Switzerland, Netherlands, UK | Survey           | 16,063 participants:<br>6,661 pregnant women<br>9,402 lactating women                                                                                                | NA                                     | 61.0% of pregnant women                                                                      |
|                               |           | 10 Apr 2020 – 31 May 2020 | Belgium                                       |                  |                                                                                                                                                                      | 69.0% of lactating women               |                                                                                              |
| Citu et al. (2022)            | (35)      | 1 Oct 2021 – 1 Dec 2021   | Romania                                       | Survey           | 345 participants:<br>184 pregnant women<br>161 non-pregnant women of reproductive age                                                                                | NA                                     | 47.8% of pregnant women<br>59.7% of non-pregnant women of reproductive age                   |
| Citu et al. (2022)            | (36)      | 1 Jan 2022 – 1 May 2022   | Romania                                       | Survey           | 345 pregnant women                                                                                                                                                   | 53.3% of pregnant women                | NA                                                                                           |
| Egloff et al. (2022)          | (37)      | 18 Feb 2021 – 5 Apr 2021  | France                                        | Survey           | 664 pregnant women                                                                                                                                                   | NA                                     | 29.5% of pregnant women                                                                      |
| Erchick et al. (2022)         | (25)      | 15 Dec 2020 – 23 Dec 2020 | USA                                           | Survey           | 8,481 participants:<br>233 pregnant women<br>8,248 non-pregnant women                                                                                                | NA                                     | 65.9% of pregnant women<br>59.6% of non-pregnant women                                       |
| Geoghegan et al. (2021)       | (38)      | 4 Dec 2020 – 14 Jan 2021  | Ireland                                       | Survey           | 300 pregnant women                                                                                                                                                   | NA                                     | 38.0% during pregnancy<br>63.0% after pregnancy                                              |
| Germann et al. (2022)         | (32)      | 22 Mar 2021 – 2 Apr 2021  | USA                                           | Survey           | 456 participants:<br>435 pregnant women<br>21 postpartum women                                                                                                       | NA                                     | 60.0% of pregnant and postpartum women                                                       |
|                               |           | 29 Jun 2021 – 20 Nov 2021 |                                               | Follow-up survey | 290 participants:<br>68 pregnant women<br>222 postpartum women                                                                                                       | 52.0% of pregnant and postpartum women | 14.0% of pregnant women<br>35% of postpartum women                                           |
| Gutierrez et al. (2022)       | (33)      | Jan 2021                  | USA                                           | Survey           | 5,269 participants:<br>1,190 pregnant and postpartum women                                                                                                           | NA                                     | 53.4% of pregnant and postpartum women<br>57.1% of other participants                        |
| Hosokawa et al. (2022)        | (39)      | 24 Jul 2021 – 30 Aug 2021 | Japan                                         | Survey           | 1,621 pregnant women                                                                                                                                                 | 13.4% of pregnant women                | 49.1% of pregnant women                                                                      |
| Kuciel et al. (2022)          | (40)      | 1 Jul 2021 – 30 Aug 2021  | Poland                                        | Survey           | 118 participants:<br>28 pregnant women<br>60 lactating women<br>109 mothers                                                                                          | NA                                     | NA                                                                                           |
| Levy et al. (2021)            | (41)      | 14 Dec 2020 – 14 Jan 2021 | USA                                           | Survey           | 662 pregnant women                                                                                                                                                   | NA                                     | 58.3% of pregnant women                                                                      |
| Mappa et al. (2021)           | (42)      | 27 Dec 2020               | Italy                                         | Survey           | 161 pregnant women                                                                                                                                                   | NA                                     | 52.9% of pregnant women                                                                      |
| Mohan et al. (2021)           | (43)      | 15 Oct 2020 – 15 Nov 2020 | Qatar                                         | Survey           | 341 pregnant and lactating women                                                                                                                                     | NA                                     | 49.1% of participants                                                                        |
| Nguyen et al. (2021)          | (44)      | Jan – Feb 2021            | Vietnam                                       | Survey           | 651 participants: pregnant women or postpartum                                                                                                                       | NA                                     | 60.4% of all participants                                                                    |
| Oluklu et al. (2021)          | (45)      | 11 Feb 2021 – 21 Mar 2021 | Turkey                                        | Survey           | 412 postpartum women:<br>363 lactating women                                                                                                                         | NA                                     | 33.3% of postpartum women                                                                    |
| Perez et al. (2021)           | (29)      | 8 Jan 2021 – 31 Jan 2021  | USA                                           | Survey           | 11,405 female HCP of reproductive age:<br>955 women attempting pregnancy<br>2,196 pregnant women<br>2,250 lactating women<br>67 lactating women attempting pregnancy | 73.6% of all participants              | 75.3% of all participants strongly desire or desired vaccination – 1.5% are strongly adverse |

|                             |      |                             |                                                                                                                                           |                            |                                                                                            |                                                                                  |                                                                                    |
|-----------------------------|------|-----------------------------|-------------------------------------------------------------------------------------------------------------------------------------------|----------------------------|--------------------------------------------------------------------------------------------|----------------------------------------------------------------------------------|------------------------------------------------------------------------------------|
|                             |      |                             |                                                                                                                                           |                            | 91 women pregnant and lactating<br>5,846 preventing pregnancy                              |                                                                                  |                                                                                    |
| Perrotta et al. (2022)      | (46) | 1 Mar 2021 – 23 Jul 2021    | USA                                                                                                                                       | Survey                     | 299 pregnant women                                                                         | 20.7% of pregnant women                                                          | 42.8% of pregnant women                                                            |
| Pisula et al. (2022)        | (47) | 24 Oct 2021 – 9 Nov 2021    | Poland                                                                                                                                    | Survey                     | 515 pregnant women                                                                         | 58.1% of pregnant women                                                          | 6.2% of pregnant women                                                             |
| Razzaghi et al. (2022)      | (31) | 31 Mar 2021 – 16 Apr 2021   | USA                                                                                                                                       | Survey                     | 1,561 pregnant women                                                                       | 21.7% of pregnant women                                                          | 24.0% of pregnant women                                                            |
| Redmond et al. (2022)       | (48) | June 2020 – Aug 2020        | USA                                                                                                                                       | Survey                     | 26 pregnant women<br>1 postpartum woman                                                    | NA                                                                               | 63.0% of pregnant and postpartum women                                             |
| Riad et al. (2021)          | (49) | Aug 2021 – Oct 2021         | Czechia                                                                                                                                   | Survey                     | 362 participants:<br>278 pregnant women<br>84 lactating women                              | NA                                                                               | 66.6% of pregnant and lactating women                                              |
| Saleh et al. (2022)         | (50) | End Sep 2020 – mid-Jan 2021 | Israel                                                                                                                                    | Survey                     | 410 participants:<br>293 pregnant women<br>117 postpartum women of whom 84 were lactating  | NA                                                                               | 40% of postpartum participants                                                     |
| Samannodi et al. (2021)     | (51) | 12 Jun 2021 – 1 Aug 2021    | Saudi Arabia                                                                                                                              | Survey                     | 431 women:<br>214 women pregnant or planning to be pregnant                                | 57.1% of all participants                                                        | NA                                                                                 |
| Schaal et al. (2021)        | (30) | 30 Mar 2021 – 19 Apr 2021   | Germany                                                                                                                                   | Survey                     | 2,339 participants:<br>1,043 pregnant women<br>1,296 lactating women                       | 2.4% of pregnant women<br>13.7% of lactating women                               | 13.8% of pregnant women<br>39.4% of lactating women                                |
| Skirrow et al. (2022)       | (24) | 3 Aug 2020 – 11 Oct 2020    | UK                                                                                                                                        | Survey                     | 1,181 pregnant women                                                                       | NA                                                                               | 62.1% during current pregnancy                                                     |
|                             |      | 7 Dec 2020 – 16 Dec 2020    |                                                                                                                                           | Semi-structured interviews | 10 pregnant women                                                                          |                                                                                  | 81.2% <u>after delivery</u>                                                        |
| Skjefte et al. (2021)       | (22) | 28 Oct 2020 – 18 Nov 2020   | Italy, Chile, Peru, New Zealand, Russia, Australia, Colombia, Brazil, Spain, South Africa, India, Mexico, Philippines, Argentina, USA, UK | Survey                     | 17,871 participants:<br>5,294 pregnant women<br>12,562 non-pregnant women                  | NA                                                                               | 52.0% of pregnant women<br>73.4% of non-pregnant women                             |
| Stuckelberger et al. (2021) | (52) | 18 Jun 2020 – 12 Jul 2020   | Switzerland                                                                                                                               | Survey                     | 1,551 participants:<br>515 pregnant women<br>1,036 lactating women                         | NA                                                                               | 29.7% of pregnant women<br>38.6% of lactating women                                |
| Sutton et al. (2021)        | (27) | 7 Jan 2021 – 29 Jan 2021    | USA                                                                                                                                       | Survey                     | 1,012 participants:<br>216 pregnant women<br>122 lactating women<br>656 non-pregnant women | 1.9% of pregnant women<br>3.3% of lactating women<br>13.3% of non-pregnant women | 44.3% of pregnant women<br>55.2% of lactating women<br>76.2% of non-pregnant women |
| Tao et al. (2021)           | (26) | 13 Nov 2020 – 27 Nov 2020   | China                                                                                                                                     | Survey                     | 1,392 pregnant women                                                                       | NA                                                                               | 77.0% of pregnant women                                                            |
| Ward et al. (2022)          | (53) | NA                          | Australia                                                                                                                                 | Survey                     | 218 pregnant women                                                                         | 44.0% of pregnant women                                                          | 7.4% of pregnant women                                                             |
| Waring et al. (2022)        | (54) | Mid-Feb 2021 – mid-Mar 2021 | USA                                                                                                                                       | Survey                     | 203 women:<br>15 pregnant women<br>188 non-pregnant women (mothers)                        | 47.3% of pregnant and non-pregnant women                                         | 66.0% of pregnant women<br>73.0% of non-pregnant women                             |

## 2. COVID-19 VACCINE CONFIDENCE IN HCP

The perception of French HCPs towards COVID-19 vaccination during pregnancy was investigated via an anonymous survey distributed from January until March 2021. Overall, midwives were less likely to recommend COVID-19 vaccination during pregnancy (37.5%), compared to general practitioners (50.7%) and obstetricians (58.8%) (55).

To study how HCPs view COVID-19 vaccination during pregnancy, a survey of women (including pregnant and lactating women), midwives, doctors providing maternity care and midwifery students was conducted in Australia in early 2021. The study found that doctors and midwifery students were significantly more likely to advise COVID-19 vaccination during pregnancy compared to midwives. Unfortunately, in this study, pregnant and lactating women were not asked if a recommendation from a HCP was a motivational factor or not when looking at influential factors that determined pregnant and lactating women's decision to be vaccinated (56).

## 3. DETERMINANTS PREDICTING COVID-19 VACCINE ACCEPTANCE

Most of the surveys (N= 26) included in this review not only measured readiness to get vaccinated against COVID-19 during pregnancy or lactation, but also described determinants linked with COVID-19 vaccine acceptance.

### 3.1. *Factors influencing COVID-19 vaccine acceptance during pregnancy*

The most important reason for refusing COVID-19 vaccination during pregnancy is safety concerns, as described in 19 studies (22,24–27,30–32,37–39,41–43,46–49,53). These safety concerns include the assumption of potential harm to the baby and to the mother, both in the short and long term. Other concerns include that there is not yet enough clinical trial data on COVID-19 vaccination during pregnancy (22,24,27,30,32,46) and that COVID-19 vaccines are seen as not being trustworthy because they were developed and approved rapidly (22,24,31,39). In Japan, mistrust in the government was determined as the only significant factor linked to vaccine hesitancy among pregnant women (39). Not believing in vaccines and in the existence of the SARS-CoV-2 virus, not being afraid of COVID-19, and trusting rumours on social media were also described as statistically independent risk factors for vaccine hesitancy among pregnant women (35).

1  
2  
3 Receiving an influenza vaccine (27,31,32,37,52) and/or pertussis vaccine during pregnancy  
4 (24,32) are positive determinants for accepting COVID-19 vaccination among pregnant  
5 women. Other positive factors are a recommendation by a HCP or having a discussion with a  
6 HCP about COVID-19 vaccines (31,32,37,38,48,53), believing to be at high risk of or concerns  
7 about contracting COVID-19 (22,29,32), being aware of having an increased risk of severe  
8 illness due to COVID-19 (53), and living with individuals with or themselves suffering from co-  
9 morbidities/high risk conditions (31).  
10  
11  
12  
13  
14  
15  
16  
17

18 Demographic factors associated with better COVID-19 vaccine willingness are a higher level of  
19 education (22,32,33,36,37,39,41,42,46,47,49,50,52), being employed (31,32,42,50), having a  
20 higher income (22,24,33,35,36,46,47), older age (22,24,25,32,33,37,41,46,49,52), being in the  
21 third trimester of gestation (26,36,38,49,52), multiparity (37,49), and living in an urban area  
22 (35,36,47,50). Other demographic factors linked to COVID-19 vaccine willingness are race and  
23 ethnicity (24,29,31,41,43,50). Interestingly, pregnant Chinese women of younger age and with  
24 a lower level of education were more likely to accept COVID-19 vaccination (26).  
25  
26  
27  
28  
29  
30  
31

### 32 3.2. Factors influencing COVID-19 vaccine acceptance during lactation

33  
34 Lactating/postpartum women were found to have similar safety concerns to pregnant women  
35 (27,30,32,45,49). One of the reasons for refusing the vaccine or being hesitant about getting  
36 it is the lack of reliable data on the administration and effectiveness of a COVID-19 vaccine  
37 during lactation (30,45). Additionally, there were concerns in this target group that the COVID-  
38 19 vaccine could cause infertility (27).  
39  
40  
41  
42

43 Two studies described several demographic factors in pregnant and lactating/postpartum  
44 women associated with a lower likelihood of vaccination: younger age (33,52), lower level of  
45 education (33,52) and lower income (33). However, both studies did not distinguish between  
46 pregnant and lactating/postpartum women (33,52). Another study found that there was no  
47 significant difference in age and educational level in the group of lactating women willing to  
48 accept the vaccine and the group of lactating women resistant to the vaccine. However,  
49 lactating healthcare workers had a significantly higher COVID-19 vaccine acceptance level  
50 compared to non-healthcare workers (49).  
51  
52  
53  
54  
55  
56  
57  
58  
59  
60

#### 4. THE IMPACT OF THE COVID-19 PANDEMIC ON OTHER VACCINATIONS

Several studies also discussed vaccine willingness for other diseases in pregnancy during the COVID-19 pandemic. Two studies focused on influenza, one focused on pertussis while another one focused on vaccines during pregnancy in general (47,50,57,58). A study conducted in Turkey found that 77.0% of the interviewed pregnant women received or intended to receive vaccination during pregnancy. For 50.6% of these women, the COVID-19 pandemic had not affected their views on being vaccinated in the future (57).

Another study analysed the effect of the COVID-19 pandemic on seasonal influenza vaccine compliance among pregnant and postpartum women in Israel from September 2020 until mid-January 2021. The research found that, despite the high incidence of COVID-19, vaccine uptake was similar to pre-pandemic times with 54.4% of the women studied being vaccinated against influenza (50).

The knowledge and attitudes of Polish pregnant women towards influenza vaccination was searched in 2021. In total, 21.0% had been vaccinated against influenza during pregnancy and 17.5% were planning to get vaccinated. The study stated that there is a link between influenza vaccine uptake and COVID-19 vaccine uptake in pregnant women. Women who refused COVID-19 vaccination did not intend to get an influenza vaccine and vice versa (47).

Furthermore, the experience of women getting vaccinated against pertussis during pregnancy in COVID-19 times was explored in the United Kingdom. The study used an online survey which was spread from 3 August until 11 October 2020. The survey was completed by 922 pregnant women and 482 postpartum women who had been pregnant at some point after the first lockdown. The study found that 72.1% of pregnant women and 84.0% of postpartum women had received a pertussis vaccine during pregnancy even when access was hampered due to COVID-19 restrictions (58).

#### 5. THE IMPACT OF SOCIAL MEDIA ON COVID-19 VACCINE CONFIDENCE

Social media is an important source of information on COVID-19 vaccines for pregnant and lactating women. However, only 8.3% of the pregnant and lactating women studied reported that media/social media was an important factor when deciding to receive or not receive COVID-19 vaccination (49).

1  
2  
3 Three surveys conducted in remote Alaskan communities between November 2020 and  
4 September 2021 focused on the impact of COVID-19 on the daily life and attitude towards  
5 COVID-19 vaccination of adults, including pregnant women, living in these communities. By  
6 September 2021, misunderstandings about vaccine recommendations during pregnancy and  
7 the effects of COVID-19 vaccination on fertility and DNA were present in participants where  
8 social media was identified as the primary source of information (59).

9  
10  
11  
12  
13  
14 The changes in Google Search interest on vaccination during pregnancy after the introduction  
15 of COVID-19 vaccination in Italy was investigated by using Google Trends. The data covered  
16 searches from 1 January 2019 until 31 October 2021. This made it possible to monitor the  
17 changes over two years before the introduction of COVID-19 vaccination until 31 October  
18 2021. The analysis of Google Trends indicated that the search interest for 'vaccination in  
19 pregnancy' was increased significantly (both qualitative and quantitative) compared to the  
20 predicted trend after the start of the Italian COVID-19 vaccination campaign. Moreover,  
21 further qualitative analysis showed that the increase was most likely due to concerns about  
22 COVID-19 vaccination (60).

23  
24  
25  
26  
27  
28  
29  
30 Among pregnant Romanian women, trusting rumours on social media had the greatest impact  
31 on vaccine hesitancy according to a study performed from 1 October until 1 December 2021.  
32 Compared to non-pregnant women (63.0%), significantly more pregnant women (78.1%)  
33 answered 'yes' to the question if they trusted social media rumours (35). In a survey  
34 conducted a few months later, Romanian unvaccinated pregnant women (44.7%) were  
35 significantly more likely to select social media as a trustworthy decision-making factor  
36 compared to vaccinated pregnant women (25.0%) (36).

37  
38  
39  
40  
41  
42  
43 A social media campaign called 'One Vax Two Lives' was set up in Washington to encourage  
44 the spread of scientifically-based information about the risks of COVID-19 and benefits of  
45 COVID-19 vaccination during pregnancy. The campaign reached a lot of people through ads  
46 on Facebook and Instagram, but the number of visitors to the informative website linked to  
47 the project remained rather low. It is not clear what the actual impact of the campaign was  
48 on vaccine confidence and uptake in pregnant women (61).



## Discussion

Maternal vaccination has already proven to be an effective means to prevent infectious disease-related morbidity and mortality in pregnant women, foetuses and infants. During the COVID-19 pandemic, the topic of vaccination during pregnancy and lactation received a lot of attention. In many countries, HCPs were one of the priority groups to receive vaccination against COVID-19. A lot of these HCPs are of fertile age, pregnant and/or lactating. These women were among the first fertile/pregnant/lactating women to be vaccinated against COVID-19. The vaccine was assumed to be safe for these target groups, based on previous research which generated reassuring evidence on the use of inactivated vaccines during pregnancy/lactation. However, lack of robust data on the safety, immunogenicity and efficacy of the COVID-19 vaccines and the existence of varying recommendations concerning COVID-19 vaccination during pregnancy and lactation in different areas of the world started an important debate on COVID-19 vaccination during pregnancy and lactation.

Even before the start of the COVID-19 pandemic, the World Health Organization (WHO) defined vaccine hesitancy as one of the top ten threats to global health (62). Therefore, insights into factors influencing willingness to get vaccinated are crucial to plan effective interventions to increase vaccine coverage, especially in high-risk groups (such as pregnant and lactating women). Surveys performed during the COVID-19 pandemic - both before and after licensure of COVID-19 vaccines - demonstrated that willingness to get vaccinated against COVID-19 is generally lower in pregnant and lactating women than in non-pregnant and non-nursing women, which was not a surprising finding. On a global scale, vaccine hesitancy is more common in pregnant and lactating women. Many studies have reported that there are low coverage rates for influenza and Tdap vaccines in pregnant and lactating women. This population also shows low vaccine confidence. However, the overall reluctance towards COVID-19 vaccination is even higher compared to other vaccines recommended to be administered during pregnancy and/or lactation. This is possibly caused by the belief that COVID-19 vaccines were tested and approved too quickly and that in the initial pre-marketing trials no data were collected on pregnant and lactating women.

1  
2  
3 Safety concerns are reported as the main reason for refusal of COVID-19 vaccination during  
4 pregnancy and lactation. The belief that COVID-19 vaccines could cause harm to the  
5 reproductive system, foetus/baby and/or to the women themselves is the most commonly  
6 cited driver for vaccine hesitancy. This is not a new observation; before the COVID-19  
7 pandemic, similar concerns were mentioned as the most frequently cited barrier to being  
8 vaccinated during pregnancy (63).  
9

10  
11  
12 The reasons for vaccine hesitancy towards COVID-19 vaccination in pregnant and lactating  
13 women are comparable to those in the general population, where concerns about safety,  
14 efficacy and the rapid development and approval of the vaccines are also the key  
15 determinants for COVID-19 vaccine refusal (64). These observations highlight the importance  
16 of high-quality clinical trials that include pregnant and lactating women. Furthermore, it is  
17 important to clearly and transparently communicate the findings from these trials to all  
18 population groups to increase vaccine coverage rates.  
19  
20  
21  
22  
23  
24  
25  
26  
27  
28

29 Before the start of the pandemic, a systematic review defined a HCP recommendation as the  
30 most important factor affecting vaccine confidence during pregnancy (20); later studies found  
31 the same for COVID-19 vaccination. Recommendations from HCPs were pinpointed as the  
32 most influential strategy to increase vaccine willingness (48). However, these  
33 recommendations are often still overshadowed by anxiety about side effects and messages  
34 circulating social media. Another worrying factor is that not all HCPs support COVID-19  
35 vaccination during pregnancy. Especially midwives seem to be less likely to recommend  
36 COVID-19 vaccination during pregnancy, which is in line with studies on other vaccines before  
37 the pandemic (65). Therefore, it is crucial to provide HCPs access to tailored information on  
38 vaccination. Moreover, proper education of HCPs concerning the effects and importance of  
39 vaccines during pregnancy and lactation is needed.  
40  
41  
42  
43  
44  
45  
46  
47  
48  
49

50 Besides clear formulation of vaccination recommendations during pregnancy/lactation, it is of  
51 equal importance that correct information on these recommendations reaches the target  
52 groups. In a survey conducted in remote Alaskan communities, 22.8% of the participants were  
53 not aware that COVID-19 vaccination was recommended during pregnancy, 26.5% of the  
54 participants were unsure about a recommendation for pregnant women, and 28.1% of the  
55 participants were uncertain if COVID-19 vaccination would affect fertility or not. Furthermore,  
56  
57  
58  
59  
60

1  
2  
3 participants often cited pregnancy and lactation as reasons to postpone COVID-19 vaccination  
4 (59). Additionally, in a questionnaire in Saudi Arabia on public knowledge regarding COVID-19  
5 vaccination, 46.2% of males and 24.2% of females did not know if COVID-19 vaccination was  
6 recommended for pregnant women or not. Also, 72.4% of female participants stated that  
7 COVID-19 vaccination was not preferred during pregnancy (66).  
8  
9

10  
11 To avoid the misconceptions mentioned above and to make sure that target groups are made  
12 aware of the most recent recommendations, specific programmes and tools need to be  
13 developed – each adapted according to region, language and accessibility. Here, proper  
14 education of HCPs is again key to support these programmes and tools to make these  
15 interventions effective.  
16  
17

18 Since social media has become an integral part of our lives, these platforms can be used to  
19 inform women who are pregnant, lactating or planning to be pregnant about vaccine  
20 recommendations. For many, it has become an important source of information and it is used  
21 to form an opinion about all kinds of topics, including COVID-19 and COVID-19 vaccination. In  
22 Italy, research showed that Google Search interest for ‘vaccination in pregnancy’ increased  
23 significantly after Italy’s COVID-19 vaccination campaign had started (60). Further research is  
24 still needed to accurately define the relation between social media and Internet searches and  
25 actual vaccine uptake during pregnancy or lactation.  
26  
27  
28  
29  
30  
31  
32  
33  
34  
35  
36  
37

38 A six month follow-up study comparing COVID-19 vaccine hesitancy and actual vaccine uptake  
39 in pregnant and postpartum women concluded that being hesitant towards COVID-19  
40 vaccines at baseline persisted, with only 10% of individuals transitioning from being vaccine  
41 hesitant to being vaccinated (32). This highlights that efficient interventions and educational  
42 strategies need to be developed to increase vaccine confidence, which subsequently increases  
43 vaccine coverage rates in pregnant and postpartum women. Therefore, a project was started  
44 at the University of Antwerp funded by the Vaccine Confidence Fund to identify which factors  
45 linked to social media influence vaccine confidence and in the long run the uptake of pertussis,  
46 influenza and COVID-19 vaccines in women of childbearing age, and pregnant and lactating  
47 women. The overall aim of this project - which this review is also part of - is to identify which  
48 interventions are efficient in increasing vaccine confidence in pregnant and lactating women.  
49  
50  
51  
52  
53  
54  
55  
56  
57  
58  
59  
60

## Conclusion

Vaccine hesitancy during pregnancy and lactation remains an important topic to study, especially in times of a pandemic and with the fast development of new vaccines. To improve vaccine confidence in these target groups, the inclusion of pregnant and lactating women in clinical trials could reduce safety concerns, as this was identified as the main reason to refuse vaccination. In addition, proper education of HCPs and clear, universal recommendations can also contribute to increase vaccine willingness. Further research is necessary to define the role social media plays in actual vaccine uptake. However, from our findings it can be concluded that social media messages can influence vaccine confidence in pregnant and lactating women.

## Author's contribution

LDB and KM conducted the review. PVD, GH, KP, WD read the review and provided input and comments. All authors contributed to the article and approved the submitted version.

## Funding statement

This review was funded by a grant (VCF – 010) from the Vaccine Confidence Fund, a philanthropic and charitable fund of Global Impact.

## Competing interest

None declared.

## Ethics approval

Not applicable.

## Data sharing statement

No additional data are available.

## References

1. Jamieson DJ, Rasmussen SA. An update on COVID-19 and pregnancy. Vol. 226, *American Journal of Obstetrics and Gynecology*. Elsevier Inc.; 2022. p. 177–86.
2. Omer SB, Bednarczyk RA, Madhi SA, Klugman KP. Benefits to mother and child of influenza vaccination during pregnancy. Vol. 8, *Human Vaccines and Immunotherapeutics*. 2012. p. 130–7.
3. Kandeil W, van den Ende C, Bunge EM, Jenkins VA, Ceregido MA, Guignard A. A systematic review of the burden of pertussis disease in infants and the effectiveness of maternal immunization against pertussis. Vol. 19, *Expert Review of Vaccines*. Taylor and Francis Ltd.; 2020. p. 621–38.
4. Mertz D, Geraci J, Winkup J, Gessner BD, Ortiz JR, Loeb M. Pregnancy as a risk factor for severe outcomes from influenza virus infection: A systematic review and meta-analysis of observational studies. Vol. 35, *Vaccine*. Elsevier Ltd; 2017. p. 521–8.
5. WHO. WHO recommendation pertussis [Internet]. [cited 2022 Apr 4]. Available from: [https://www.who.int/health-topics/pertussis#tab=tab\\_2](https://www.who.int/health-topics/pertussis#tab=tab_2)
6. Masseria C, Martin CK, Krishnarajah G, Becker LK, Buikema A, Tan TQ. Incidence and burden of pertussis among infants less than 1 year of age. *Pediatric Infectious Disease Journal*. 2017;36(3):e54–61.
7. Allotey J, Stallings E, Bonet M, Yap M, Chatterjee S, Kew T, et al. Clinical manifestations, risk factors, and maternal and perinatal outcomes of coronavirus disease 2019 in pregnancy: Living systematic review and meta-analysis. *The BMJ*. 2020 Sep 1;370.
8. Lokken EM, Huebner EM, Taylor GG, Hendrickson S, Vanderhoeven J, Kachikis A, et al. Disease severity, pregnancy outcomes, and maternal deaths among pregnant patients with severe acute respiratory syndrome coronavirus 2 infection in Washington State. *Am J Obstet Gynecol*. 2021 Jul 1;225(1):77.e1-77.e14.
9. Wei SQ, Bilodeau-Bertrand M, Liu S, Auger N. The impact of COVID-19 on pregnancy outcomes: A systematic review and meta-analysis. Vol. 193, *CMAJ*. Canadian Medical Association; 2021. p. E540–8.
10. Smith V, Seo D, Warty R, Payne O, Salih M, Chin KL, et al. Maternal and neonatal outcomes associated with COVID-19 infection: A systematic review. *PLoS One*. 2020 Jun 1;15(6).
11. Cui X, Zhao Z, Zhang T, Guo W, Guo W, Zheng J, et al. A systematic review and meta-analysis of children with coronavirus disease 2019 (COVID-19). *J Med Virol* [Internet]. 2021 Feb 28;93(2):1057–69. Available from: <https://onlinelibrary.wiley.com/doi/10.1002/jmv.26398>
12. Sebghati M, Khalil A. Uptake of vaccination in pregnancy. Vol. 76, *Best Practice and Research: Clinical Obstetrics and Gynaecology*. Bailliere Tindall Ltd; 2021. p. 53–65.
13. Maltezou HC, Effraimidou E, Cassimos DC, Medic S, Topalidou M, Konstantinidis T, et al. Vaccination programs for pregnant women in Europe, 2021. *Vaccine*. 2021 Oct 1;39(41):6137–43.
14. WHO. WHO recommendation COVID-19 [Internet]. [cited 2022 Jul 15]. Available from: <https://www.who.int/emergencies/diseases/novel-coronavirus-2019/covid-19-vaccines/advice>
15. WHO. WHO recommendation influenza [Internet]. [cited 2022 Jul 15]. Available from: <https://www.who.int/teams/global-influenza-programme/vaccines/vaccine-use>

16. Lajos GJ, Fialho SCAV, Kfoury RDÁ, Robial R, Roteli-Martins CM. Vaccination in pregnant and postpartum women. *Revista Brasileira de Ginecologia e Obstetricia*. 2020 Dec 1;42(12):851–5.
17. Luxi N, Giovanazzi A, Capuano A, Crisafulli S, Cutroneo PM, Fantini MP, et al. COVID-19 Vaccination in Pregnancy, Paediatrics, Immunocompromised Patients, and Persons with History of Allergy or Prior SARS-CoV-2 Infection: Overview of Current Recommendations and Pre- and Post-Marketing Evidence for Vaccine Efficacy and Safety. Vol. 44, *Drug Safety*. Adis; 2021. p. 1247–69.
18. Giles ML, Gunatilaka A, Palmer K, Sharma K, Roach V. Alignment of national COVID-19 vaccine recommendations for pregnant and lactating women. *Bull World Health Organ*. 2021 Oct 1;99(10):739–46.
19. Drezner D, Youngster M, Klainer H, Youngster I. Maternal vaccinations coverage and reasons for non-compliance - A cross-sectional observational study. *BMC Pregnancy Childbirth*. 2020 Sep 16;20(1).
20. Kilich E, Dada S, Francis MR, Tazare J, Chico RM, Paterson P, et al. Factors that influence vaccination decisionmaking among pregnant women: A systematic review and meta-analysis. *PLoS One*. 2020 Jul 1;15(7 July 2020).
21. Ceulemans M, Foulon V, Panchaud A, Winterfeld U, Pomar L, Lambelet V, et al. Vaccine willingness and impact of the covid-19 pandemic on women’s perinatal experiences and practices—a multinational, cross-sectional study covering the first wave of the pandemic. *Int J Environ Res Public Health*. 2021 Apr 1;18(7).
22. Skjefte M, Ngirbabul M, Akeju O, Escudero D, Hernandez-Diaz S, Wyszynski DF, et al. COVID-19 vaccine acceptance among pregnant women and mothers of young children: results of a survey in 16 countries. *Eur J Epidemiol*. 2021 Feb 1;36(2):197–211.
23. Stuckelberger S, Favre G, Ceulemans M, Nordeng H, Gerbier E, Lambelet V, et al. Sars-cov-2 vaccine willingness among pregnant and breastfeeding women during the first pandemic wave: A cross-sectional study in Switzerland. *Viruses*. 2021 Jul 1;13(7).
24. Skirrow H, Barnett S, Bell S, Riaposova L, Mounier-Jack S, Kampmann B, et al. Women’s views on accepting COVID-19 vaccination during and after pregnancy, and for their babies: a multi-methods study in the UK. *BMC Pregnancy Childbirth* [Internet]. 2022 Dec 14;22(1):33. Available from: <https://bmcpregnancychildbirth.biomedcentral.com/articles/10.1186/s12884-021-04321-3>
25. Erchick DJ, Agarwal S, Kaysin A, Gibson DG, Labrique AB. Changes in prenatal care and vaccine willingness among pregnant women during the COVID-19 pandemic. *BMC Pregnancy Childbirth* [Internet]. 2022 Dec 13;22(1):558. Available from: <https://bmcpregnancychildbirth.biomedcentral.com/articles/10.1186/s12884-022-04882-x>
26. Tao L, Wang R, Han N, Liu J, Yuan C, Deng L, et al. Acceptance of a COVID-19 vaccine and associated factors among pregnant women in China: a multi-center cross-sectional study based on health belief model. *Hum Vaccin Immunother*. 2021;17(8):2378–88.
27. Sutton D, D’Alton M, Zhang Y, Kahe K, Cepin A, Goffman D, et al. COVID-19 vaccine acceptance among pregnant, breastfeeding, and nonpregnant reproductive-aged women. *Am J Obstet Gynecol MFM*. 2021 Sep 1;3(5).

- 1
  - 2
  - 3
  - 4
  - 5
  - 6
  - 7
  - 8
  - 9
  - 10
  - 11
  - 12
  - 13
  - 14
  - 15
  - 16
  - 17
  - 18
  - 19
  - 20
  - 21
  - 22
  - 23
  - 24
  - 25
  - 26
  - 27
  - 28
  - 29
  - 30
  - 31
  - 32
  - 33
  - 34
  - 35
  - 36
  - 37
  - 38
  - 39
  - 40
  - 41
  - 42
  - 43
  - 44
  - 45
  - 46
  - 47
  - 48
  - 49
  - 50
  - 51
  - 52
  - 53
  - 54
  - 55
  - 56
  - 57
  - 58
  - 59
  - 60
28. Samannodi M. COVID-19 vaccine acceptability among women who are pregnant or planning for pregnancy in Saudi Arabia: A cross-sectional study. *Patient Prefer Adherence*. 2021;15:2609–18.
29. Perez MJ, Paul R, Raghuraman N, Carter EB, Odibo AO, Kelly JC, et al. Characterizing initial COVID-19 vaccine attitudes among pregnancy-capable healthcare workers. *Am J Obstet Gynecol MFM* [Internet]. 2022 Mar;4(2):100557. Available from: <https://linkinghub.elsevier.com/retrieve/pii/S2589933321002536>
30. Schaal NK, Zöllkau J, Hepp P, Fehm T, Hagenbeck C. Pregnant and breastfeeding women’s attitudes and fears regarding the COVID-19 vaccination. *Arch Gynecol Obstet*. 2021;
31. Razzaghi H, Kahn KE, Masalovich S, Black CL, Nguyen KH, Barfield WD, et al. COVID-19 Vaccination and Intent Among Pregnant Women, United States, April 2021. *Public Health Reports* [Internet]. 2022 Jun 14;003335492210992. Available from: <http://journals.sagepub.com/doi/10.1177/00333549221099244>
32. Germann K, Kiefer MK, Rood KM, Mehl R, Wu J, Pandit R, et al. Association of initial <sc>COVID</sc> -19 vaccine hesitancy with subsequent vaccination among pregnant and postpartum individuals. *BJOG* [Internet]. 2022 Jul 19;129(8):1352–60. Available from: <https://onlinelibrary.wiley.com/doi/10.1111/1471-0528.17189>
33. Gutierrez S, Logan R, Marshall C, Kerns J, Diamond-Smith N. Predictors of COVID-19 Vaccination Likelihood Among Reproductive-Aged Women in the United States. *Public Health Reports* [Internet]. 2022 May 3;137(3):588–96. Available from: <http://journals.sagepub.com/doi/10.1177/00333549221081123>
34. Abuhammad S. Attitude of pregnant and lactating women toward COVID-19 vaccination in Jordan: a cross-sectional study. *J Perinat Med* [Internet]. 2022 May 3;0(0). Available from: <https://www.degruyter.com/document/doi/10.1515/jpm-2022-0026/html>
35. Citu IM, Citu C, Gorun F, Motoc A, Gorun OM, Burlea B, et al. Determinants of COVID-19 Vaccination Hesitancy among Romanian Pregnant Women. *Vaccines (Basel)* [Internet]. 2022 Feb 10;10(2):275. Available from: <https://www.mdpi.com/2076-393X/10/2/275>
36. Citu C, Chiriac VD, Citu IM, Gorun OM, Burlea B, Bratosin F, et al. Appraisal of COVID-19 Vaccination Acceptance in the Romanian Pregnant Population. *Vaccines (Basel)* [Internet]. 2022 Jun 15;10(6):952. Available from: <https://www.mdpi.com/2076-393X/10/6/952>
37. Egloff C, Couffignal C, Cordier AG, Deruelle P, Sibiude J, Anselem O, et al. Pregnant women’s perceptions of the COVID-19 vaccine: A French survey. *Brownie SM, editor. PLoS One* [Internet]. 2022 Feb 7;17(2):e0263512. Available from: <https://dx.plos.org/10.1371/journal.pone.0263512>
38. Geoghegan S, Stephens LC, Feemster KA, Drew RJ, Eogan M, Butler KM. “This choice does not just affect me.” Attitudes of pregnant women toward COVID-19 vaccines: a mixed-methods study. *Hum Vaccin Immunother*. 2021;17(10):3371–6.
39. Hosokawa Y, Okawa S, Hori A, Morisaki N, Takahashi Y, Fujiwara T, et al. The Prevalence of COVID-19 Vaccination and Vaccine Hesitancy in Pregnant Women: An Internet-based Cross-sectional Study in Japan. *J Epidemiol* [Internet]. 2022 Apr 5;32(4):JE20210458. Available from: [https://www.jstage.jst.go.jp/article/jea/32/4/32\\_JE20210458/\\_article](https://www.jstage.jst.go.jp/article/jea/32/4/32_JE20210458/_article)

- 1
  - 2
  - 3
  - 4
  - 5
  - 6
  - 7
  - 8
  - 9
  - 10
  - 11
  - 12
  - 13
  - 14
  - 15
  - 16
  - 17
  - 18
  - 19
  - 20
  - 21
  - 22
  - 23
  - 24
  - 25
  - 26
  - 27
  - 28
  - 29
  - 30
  - 31
  - 32
  - 33
  - 34
  - 35
  - 36
  - 37
  - 38
  - 39
  - 40
  - 41
  - 42
  - 43
  - 44
  - 45
  - 46
  - 47
  - 48
  - 49
  - 50
  - 51
  - 52
  - 53
  - 54
  - 55
  - 56
  - 57
  - 58
  - 59
  - 60
40. Kuciel N, Mazurek J, Hap K, Marciniak D, Biernat K, Sutkowska E. COVID-19 Vaccine Acceptance in Pregnant and Lactating Women and Mothers of Young Children in Poland. *Int J Womens Health* [Internet]. 2022 Mar;Volume 14:415–24. Available from: <https://www.dovepress.com/covid-19-vaccine-acceptance-in-pregnant-and-lactating-women-and-mother-peer-reviewed-fulltext-article-IJWH>
41. Levy AT, Singh S, Riley LE, Prabhu M. Acceptance of COVID-19 vaccination in pregnancy: a survey study. *Am J Obstet Gynecol MFM* [Internet]. 2021 Sep;3(5):100399. Available from: <https://linkinghub.elsevier.com/retrieve/pii/S258993332100094X>
42. Mappa I, Luviso M, Distefano FA, Carbone L, Maruotti GM, Rizzo G. Women perception of SARS-CoV-2 vaccination during pregnancy and subsequent maternal anxiety: a prospective observational study. *Journal of Maternal-Fetal and Neonatal Medicine*. 2021;
43. Mohan S, Reagu S, Lindow S, Alabdulla M. COVID-19 vaccine hesitancy in perinatal women: A cross sectional survey. *J Perinat Med*. 2021 Jul 1;49(6):678–85.
44. Nguyen LH, Hoang MT, Nguyen LD, Ninh LT, Nguyen HTT, Nguyen AD, et al. Acceptance and willingness to pay for COVID-19 vaccines among pregnant women in Vietnam. *Tropical Medicine and International Health*. 2021 Oct 1;26(10):1303–13.
45. Oluklu D, Goncu Ayhan S, Menekse Beser D, Uyan Hendem D, Ozden Tokalioglu E, Turgut E, et al. Factors affecting the acceptability of COVID-19 vaccine in the postpartum period. *Hum Vaccin Immunother*. 2021;17(11):4043–7.
46. Perrotta K, Messer A, Alvarado S, Gaudette M, Tran C, Bandoli G. COVID-19 vaccine hesitancy and acceptance among pregnant people contacting a teratogen information service. *J Genet Couns* [Internet]. 2022 Jun 28; Available from: <https://onlinelibrary.wiley.com/doi/10.1002/jgc4.1608>
47. Pisula A, Sienicka A, Pawlik KK, Dobrowolska-Redo A, Kacperczyk-Bartnik J, Romejko-Wolniewicz E. Pregnant Women’s Knowledge of and Attitudes towards Influenza Vaccination during the COVID-19 Pandemic in Poland. *Int J Environ Res Public Health* [Internet]. 2022 Apr 8;19(8):4504. Available from: <https://www.mdpi.com/1660-4601/19/8/4504>
48. Redmond ML, Mayes P, Morris K, Ramaswamy M, Ault KA, Smith SA. Learning from maternal voices on COVID-19 vaccine uptake: Perspectives from pregnant women living in the Midwest on the COVID-19 pandemic and vaccine. *J Community Psychol* [Internet]. 2022 Aug 13;50(6):2630–43. Available from: <https://onlinelibrary.wiley.com/doi/10.1002/jcop.22851>
49. Riad A, Jouzová A, Üstün B, Lagová E, Hruban L, Janků P, et al. COVID-19 Vaccine Acceptance of Pregnant and Lactating Women (PLW) in Czechia: An Analytical Cross-Sectional Study. *Int J Environ Res Public Health* [Internet]. 2021 Dec 19;18(24):13373. Available from: <https://www.mdpi.com/1660-4601/18/24/13373>
50. Saleh OA, Halperin O. Influenza virus vaccine compliance among pregnant women during the COVID-19 pandemic (pre-vaccine era) in Israel and future intention to uptake BNT162b2 mRNA COVID-19 vaccine. *Vaccine* [Internet]. 2022 Mar;40(13):2099–106. Available from: <https://linkinghub.elsevier.com/retrieve/pii/S0264410X22001608>
51. Samannodi M. COVID-19 vaccine acceptability among women who are pregnant or planning for pregnancy in Saudi Arabia: A cross-sectional study. *Patient Prefer Adherence*. 2021;15:2609–18.



- 1
  - 2
  - 3
  - 4
  - 5
  - 6
  - 7
  - 8
  - 9
  - 10
  - 11
  - 12
  - 13
  - 14
  - 15
  - 16
  - 17
  - 18
  - 19
  - 20
  - 21
  - 22
  - 23
  - 24
  - 25
  - 26
  - 27
  - 28
  - 29
  - 30
  - 31
  - 32
  - 33
  - 34
  - 35
  - 36
  - 37
  - 38
  - 39
  - 40
  - 41
  - 42
  - 43
  - 44
  - 45
  - 46
  - 47
  - 48
  - 49
  - 50
  - 51
  - 52
  - 53
  - 54
  - 55
  - 56
  - 57
  - 58
  - 59
  - 60
52. Stuckelberger S, Favre G, Ceulemans M, Nordeng H, Gerbier E, Lambelet V, et al. Sars-cov-2 vaccine willingness among pregnant and breastfeeding women during the first pandemic wave: A cross-sectional study in Switzerland. *Viruses*. 2021 Jul 1;13(7).
53. Ward C, Megaw L, White S, Bradfield Z. COVID-19 vaccination rates in an antenatal population: A survey of women's perceptions, factors influencing vaccine uptake and potential contributors to vaccine hesitancy. *Australian and New Zealand Journal of Obstetrics and Gynaecology* [Internet]. 2022 Apr 22; Available from: <https://onlinelibrary.wiley.com/doi/10.1111/ajo.13532>
54. Waring ME, Pagoto SL, Rudin LR, Ho C, Horkachuck A, Kapoor IA, et al. Factors associated with mothers' hesitancy to receive a COVID-19 vaccine. *J Behav Med* [Internet]. 2022 Jan 4; Available from: <https://link.springer.com/10.1007/s10865-021-00268-0>
55. Deruelle P, Couffignal C, Sibiude J, Vivanti AJ, Anselem O, Luton D, et al. Prenatal care providers' perceptions of the SARS-Cov-2 vaccine for themselves and for pregnant women. *PLoS One*. 2021 Sep 1;16(9 September).
56. Bradfield Z, Wynter K, Hauck Y, Sweet L, Wilson AN, Szabo RA, et al. COVID-19 vaccination perceptions and intentions of maternity care consumers and providers in Australia. Xie L, editor. *PLoS One* [Internet]. 2021 Nov 15;16(11):e0260049. Available from: <https://dx.plos.org/10.1371/journal.pone.0260049>
57. Gencer H, Özkan S, Vardar O, Serçekuş P. The effects of the COVID 19 pandemic on vaccine decisions in pregnant women. *Women and Birth*. 2021;
58. Skirrow H, Barnett S, Bell S, Mounier-Jack S, Kampmann B, Holder B. Women's views and experiences of accessing pertussis vaccination in pregnancy and infant vaccinations during the COVID-19 pandemic: A multi-methods study in the UK. *Vaccine* [Internet]. 2022 Jul; Available from: <https://linkinghub.elsevier.com/retrieve/pii/S0264410X22008453>
59. Hahn MB, Fried RL, Cochran P, Eichelberger LP. Evolving perceptions of COVID-19 vaccines among remote Alaskan communities. *Int J Circumpolar Health* [Internet]. 2022 Dec 31;81(1). Available from: <https://www.tandfonline.com/doi/full/10.1080/22423982.2021.2021684>
60. Maugeri A, Barchitta M, Agodi A. Using Google Trends to Predict COVID-19 Vaccinations and Monitor Search Behaviours about Vaccines: A Retrospective Analysis of Italian Data. *Vaccines (Basel)* [Internet]. 2022 Jan 14;10(1):119. Available from: <https://www.mdpi.com/2076-393X/10/1/119>
61. Marcell L, Dokania E, Navia I, Baxter C, Crary I, Rutz S, et al. One Vax Two Lives: A Social Media Campaign and Research Program to Address COVID-19 Vaccine Hesitancy in Pregnancy. *Am J Obstet Gynecol* [Internet]. 2022 Jun; Available from: <https://linkinghub.elsevier.com/retrieve/pii/S0002937822004768>
62. WHO. WHO ten threats for global health [Internet]. [cited 2022 Jul 15]. Available from: <https://www.who.int/news-room/spotlight/ten-threats-to-global-health-in-2019>
63. Wilson RJ, Paterson P, Jarrett C, Larson HJ. Understanding factors influencing vaccination acceptance during pregnancy globally: A literature review. *Vaccine*. 2015 Nov;33(47):6420–9.
64. Troiano G, Nardi A. Vaccine hesitancy in the era of COVID-19. *Public Health*. 2021 May;194:245–51.

- 1  
2  
3 65. Dubé E, Gagnon D, Kaminsky K, Green CR, Ouakki M, Bettinger JA, et al. Vaccination  
4 during pregnancy: Canadian maternity care providers' opinions and practices. Hum  
5 Vaccin Immunother. 2020;16(11):2789–99.  
6  
7 66. Al-Zalfawi SM, Rabbani SI, Asdaq SMB, Alamri AS, Alsanie WF, Alhomrani M, et al.  
8 Public knowledge, attitude, and perception towards COVID-19 vaccination in Saudi  
9 Arabia. Int J Environ Res Public Health. 2021 Oct 1;18(19).  
10  
11  
12  
13  
14  
15  
16  
17  
18  
19  
20  
21  
22  
23  
24  
25  
26  
27  
28  
29  
30  
31  
32  
33  
34  
35  
36  
37  
38  
39  
40  
41  
42  
43  
44  
45  
46  
47  
48  
49  
50  
51  
52  
53  
54  
55  
56  
57  
58  
59  
60

For peer review only

## Preferred Reporting Items for Systematic reviews and Meta-Analyses extension for Scoping Reviews (PRISMA-ScR) Checklist

| SECTION                           | ITEM | PRISMA-ScR CHECKLIST ITEM                                                                                                                                                                                                                                                                                  | REPORTED ON PAGE #                    |
|-----------------------------------|------|------------------------------------------------------------------------------------------------------------------------------------------------------------------------------------------------------------------------------------------------------------------------------------------------------------|---------------------------------------|
| <b>TITLE</b>                      |      |                                                                                                                                                                                                                                                                                                            |                                       |
| Title                             | 1    | Identify the report as a scoping review.                                                                                                                                                                                                                                                                   | p. 1                                  |
| <b>ABSTRACT</b>                   |      |                                                                                                                                                                                                                                                                                                            |                                       |
| Structured summary                | 2    | Provide a structured summary that includes (as applicable): background, objectives, eligibility criteria, sources of evidence, charting methods, results, and conclusions that relate to the review questions and objectives.                                                                              | p. 2-3                                |
| <b>INTRODUCTION</b>               |      |                                                                                                                                                                                                                                                                                                            |                                       |
| Rationale                         | 3    | Describe the rationale for the review in the context of what is already known. Explain why the review questions/objectives lend themselves to a scoping review approach.                                                                                                                                   | p. 4-5                                |
| Objectives                        | 4    | Provide an explicit statement of the questions and objectives being addressed with reference to their key elements (e.g., population or participants, concepts, and context) or other relevant key elements used to conceptualize the review questions and/or objectives.                                  | p. 5                                  |
| <b>METHODS</b>                    |      |                                                                                                                                                                                                                                                                                                            |                                       |
| Protocol and registration         | 5    | Indicate whether a review protocol exists; state if and where it can be accessed (e.g., a Web address); and if available, provide registration information, including the registration number.                                                                                                             | Supplementary file 2 (not registered) |
| Eligibility criteria              | 6    | Specify characteristics of the sources of evidence used as eligibility criteria (e.g., years considered, language, and publication status), and provide a rationale.                                                                                                                                       | p. 6                                  |
| Information sources*              | 7    | Describe all information sources in the search (e.g., databases with dates of coverage and contact with authors to identify additional sources), as well as the date the most recent search was executed.                                                                                                  | p. 6                                  |
| Search                            | 8    | Present the full electronic search strategy for at least 1 database, including any limits used, such that it could be repeated.                                                                                                                                                                            | Supplementary file 3                  |
| Selection of sources of evidence† | 9    | State the process for selecting sources of evidence (i.e., screening and eligibility) included in the scoping review.                                                                                                                                                                                      | p. 6                                  |
| Data charting process‡            | 10   | Describe the methods of charting data from the included sources of evidence (e.g., calibrated forms or forms that have been tested by the team before their use, and whether data charting was done independently or in duplicate) and any processes for obtaining and confirming data from investigators. | Supplementary file 2                  |
| Data items                        | 11   | List and define all variables for which data were sought and any assumptions and simplifications made.                                                                                                                                                                                                     | p. 6                                  |
| Critical appraisal of individual  | 12   | If done, provide a rationale for conducting a critical appraisal of included sources of evidence; describe                                                                                                                                                                                                 | NA                                    |

| SECTION                                       | ITEM | PRISMA-ScR CHECKLIST ITEM                                                                                                                                                                       | REPORTED ON PAGE #   |
|-----------------------------------------------|------|-------------------------------------------------------------------------------------------------------------------------------------------------------------------------------------------------|----------------------|
| sources of evidence§                          |      | the methods used and how this information was used in any data synthesis (if appropriate).                                                                                                      |                      |
| Synthesis of results                          | 13   | Describe the methods of handling and summarizing the data that were charted.                                                                                                                    | Supplementary file 2 |
| <b>RESULTS</b>                                |      |                                                                                                                                                                                                 |                      |
| Selection of sources of evidence              | 14   | Give numbers of sources of evidence screened, assessed for eligibility, and included in the review, with reasons for exclusions at each stage, ideally using a flow diagram.                    | p. 7-8, p. 12        |
| Characteristics of sources of evidence        | 15   | For each source of evidence, present characteristics for which data were charted and provide the citations.                                                                                     | p. 9-11              |
| Critical appraisal within sources of evidence | 16   | If done, present data on critical appraisal of included sources of evidence (see item 12).                                                                                                      | NA                   |
| Results of individual sources of evidence     | 17   | For each included source of evidence, present the relevant data that were charted that relate to the review questions and objectives.                                                           | p. 7-15              |
| Synthesis of results                          | 18   | Summarize and/or present the charting results as they relate to the review questions and objectives.                                                                                            | p. 9-11              |
| <b>DISCUSSION</b>                             |      |                                                                                                                                                                                                 |                      |
| Summary of evidence                           | 19   | Summarize the main results (including an overview of concepts, themes, and types of evidence available), link to the review questions and objectives, and consider the relevance to key groups. | p. 16-18             |
| Limitations                                   | 20   | Discuss the limitations of the scoping review process.                                                                                                                                          | p. 19                |
| Conclusions                                   | 21   | Provide a general interpretation of the results with respect to the review questions and objectives, as well as potential implications and/or next steps.                                       | p. 19                |
| <b>FUNDING</b>                                |      |                                                                                                                                                                                                 |                      |
| Funding                                       | 22   | Describe sources of funding for the included sources of evidence, as well as sources of funding for the scoping review. Describe the role of the funders of the scoping review.                 | p. 19                |

JBI = Joanna Briggs Institute; PRISMA-ScR = Preferred Reporting Items for Systematic reviews and Meta-Analyses extension for Scoping Reviews.

\* Where *sources of evidence* (see second footnote) are compiled from, such as bibliographic databases, social media platforms, and Web sites.

† A more inclusive/heterogeneous term used to account for the different types of evidence or data sources (e.g., quantitative and/or qualitative research, expert opinion, and policy documents) that may be eligible in a scoping review as opposed to only studies. This is not to be confused with *information sources* (see first footnote).

‡ The frameworks by Arksey and O'Malley (6) and Levac and colleagues (7) and the JBI guidance (4, 5) refer to the process of data extraction in a scoping review as data charting.

§ The process of systematically examining research evidence to assess its validity, results, and relevance before using it to inform a decision. This term is used for items 12 and 19 instead of "risk of bias" (which is more applicable to systematic reviews of interventions) to include and acknowledge the various sources of evidence that may be used in a scoping review (e.g., quantitative and/or qualitative research, expert opinion, and policy document).

From: Tricco AC, Lillie E, Zarin W, O'Brien KK, Colquhoun H, Levac D, et al. PRISMA Extension for Scoping Reviews (PRISMA-ScR): Checklist and Explanation. *Ann Intern Med.* 2018;169:467–473. doi: 10.7326/M18-0850.



St. Michael's

Inspired Care.  
Inspiring Science.

For peer review only - <http://bmjopen.bmj.com/site/about/guidelines.xhtml>

15/11/2021 v3

## RESEARCH PROTOCOL

# The influence of the COVID-19 pandemic and social media on behaviour of pregnant and lactating women towards vaccination: a scoping review

Larissa De Brabandere<sup>1</sup>, Greet Hendrickx<sup>1</sup>, Karolien Poels<sup>2</sup>, Walter Daelemans<sup>3</sup>, Pierre Van Damme<sup>1</sup>, Kirsten Maertens<sup>1</sup>

<sup>1</sup> Centre for the Evaluation of Vaccination, Vaccine & Infectious Diseases Institute, University of Antwerp, Antwerp, Belgium

<sup>2</sup> Media, ICT & Organizations and Society, Department of Communication Studies, University of Antwerp, Antwerp, Belgium

<sup>3</sup> CLiPS, Department for Linguistics, University of Antwerp, Antwerp, Belgium

### Background

In March 2020, the World Health Organization (WHO) announced that the COVID-19 outbreak, caused by the SARS-CoV-2 virus, could be characterized as a pandemic. As of November 8<sup>th</sup> 2021, there have been >400 million confirmed COVID-19 cases and almost 6 million COVID-19 confirmed deaths worldwide. Similar to other populations, pregnant and lactating women can encounter SARS-CoV-2 and might contract COVID-19. SARS-CoV-2 infection during pregnancy is associated with increased rates of stillbirth, preterm birth, pre-eclampsia and caesarian delivery. Furthermore, pregnant women are at increased risk of hospitalization, admission to intensive care unit and death compared to non- pregnant women (1,2). If breastfeeding women contract COVID-19, they can become seriously ill impeding them from continuing breastfeeding. Besides, they can transmit the disease via droplet transmission to their newborn child (3).

One of the most important approaches to control the ongoing pandemic is COVID-19 vaccination. Since the beginning of 2021, several COVID-19 vaccines have been licensed and

15/11/2021 v3

1  
2  
3 implemented worldwide. Since pregnant and lactating women were initially not included in  
4 pre-marketing clinical trials, many questions rose about development, safety, immunogenicity  
5 and effectiveness of COVID-19 vaccines in these target groups. Although there was absence  
6 of data on safety and efficacy of COVID-19 vaccines during pregnancy or lactation, several  
7 countries started to recommend vaccination in these target groups (4).  
8  
9  
10  
11  
12

13  
14 The COVID-19 pandemic and its accompanying vaccination campaign led to an abundance of  
15 misinformation about vaccination on the Internet (5). Fake news that has circulated about  
16 COVID-19 vaccination in pregnant women, women of childbearing age and lactating women  
17 included: 1. COVID-19 vaccination could cause infertility 2. there is an increased risk of  
18 miscarriage/stillbirth after receiving a COVID-19 vaccine while pregnant 3. it is unsafe for  
19 breastfeeding women to receive a COVID-19 vaccine (6). These myths can feed vaccine  
20 hesitancy in this important target group. Since the World Health Organization (WHO)  
21 described in 2019 vaccine hesitancy as one of the top 10 global health threats (7), it is  
22 important to tackle these obstacles and to improve vaccine uptake.  
23  
24  
25  
26  
27  
28  
29  
30  
31

32 To set up right interventions to improve vaccine confidence, it is necessary to determine the  
33 factors that influence vaccine decision-making in pregnant and lactating women. The  
34 systematic review of Kilich et al. describes determinants that influence vaccine confidence  
35 among pregnant women (8). However, this study is limited to pre-pandemic information, does  
36 not include lactating women and does not focus on social media.  
37  
38  
39  
40  
41  
42

### 43 **Research question**

44  
45 What is the impact of the COVID-19 pandemic and social media on vaccine confidence in  
46 pregnant and lactating women?  
47  
48  
49

### 50 **Objectives**

- 51 1. Comparing vaccine confidence in pregnant and lactating women before and after the  
52 COVID-19 pandemic.
- 53 2. Describing vaccine willingness towards COVID-19 vaccination in pregnant and lactating  
54 women.  
55  
56  
57  
58  
59  
60

15/11/2021 v3

3. Determination of factors linked to vaccine (un)willingness towards COVID-19 vaccination in pregnant and lactating women.
4. Appraise the impact of social media on vaccine confidence in pregnant and lactating women.

## Methods

We propose to answer the research question above by conducting a scoping review following the PRISMA guidelines. The study will begin November 2021 and will be finished as soon as possible (before end of December 2021).

### Search strategy

The review will be conducted by doing a literature study. First, grey literature will be searched. This search includes a general web search on Google (limited to the first 50 results) and Google Scholar (limited to the first 200 results). Search terms will be adjusted and refined based on the number and types of relevant hits. If there is a relevant publication found, it will be considered for inclusion.

PubMed will be used as database to search literature. Due to time pressure, only one database will be searched. Since PubMed gives access to three components (MEDLINE, PubMed Central and Bookshelf) and contains more than 34 million citations and abstracts of biomedical literature and life sciences, this database is selected.

### Inclusion and exclusion criteria

All articles, without language restriction, published from November 22<sup>nd</sup> 2018 (since Kilich et al. searched all articles by November 22<sup>nd</sup> 2018) related to the research question will be included.

Following criteria will lead to exclusion:

1. Reviews
2. Articles whose focus is not our target population (pregnant and lactating women)
3. Abstracts, no full text available

15/11/2021 v3

- 1  
2  
3 4. Articles describing outcomes of COVID-19 infection or COVID-19 vaccination in  
4 pregnant and lactating women.  
5  
6  
7

8  
9 Data charting

10 Included articles will be abstracted and synthesized by one reviewer following the procedure  
11 described below. Verification will be done by a second reviewer. Disagreements will be  
12 addressed through discussion between the reviewers and the other researchers.  
13  
14  
15  
16

17  
18 Synthesis of included articles:

19 a. Study characteristics

- 20  
21 i. Author(s)  
22  
23 ii. Year of publication  
24  
25 iii. Year the study was conducted  
26  
27 iv. Type of publication (e.g. clinical trial, survey,...)  
28  
29 v. Publication title  
30  
31 vi. Journal in which study is published  
32  
33 vii. Country of publication  
34  
35 viii. Language of dissemination  
36  
37 ix. Topic of the study

38 b. Study methods

- 39  
40 i. Study location (country, city)  
41  
42 ii. Study design  
43  
44 iii. Study population  
45  
46 iv. Study sample size (N= xxx)  
47  
48 v. Follow-up time / timing of the study

49 c. Results

- 50  
51 i. COVID-19 vaccine coverage (N= xxx)  
52  
53 ii. COVID-19 vaccine willingness (N= xxx)  
54  
55 iii. Factors influencing COVID-19 vaccine willingness  
56  
57 iv. Vaccine coverage other than COVID-19 (N= xxx)  
58  
59 v. Vaccine willingness other than COVID-19 (N= xxx)  
60  
vi. Social media platforms described



15/11/2021 v3

vii. Influence of social media

d. Quality of the study

i. Strengths

ii. Limitations

iii. Bias (selection / performance / performance / attrition / reporting / other)

## References

1. Chmielewska B, Barratt I, Townsend R, Kalafat E, van der Meulen J, Gurol-Urganci I, et al. Effects of the COVID-19 pandemic on maternal and perinatal outcomes: a systematic review and meta-analysis. *Lancet Glob Health*. 2021 Jun 1;9(6):e759–72.
2. Wei SQ, Bilodeau-Bertrand M, Liu S, Auger N. The impact of COVID-19 on pregnancy outcomes: A systematic review and meta-analysis. Vol. 193, *CMAJ*. Canadian Medical Association; 2021. p. E540–8.
3. Bhatt H. Should COVID-19 Mother Breastfeed her Newborn Child? A Literature Review on the Safety of Breastfeeding for Pregnant Women with COVID-19. Available from: <https://doi.org/10.1007/s13668-020-00343-z>
4. COVID-19 vaccine policies on pregnancy and lactation [Internet]. [cited 2021 Nov 8]. Available from: <https://www.comitglobal.org/explore/public-health-authorities/pregnancy>
5. Ennab F, Babar MS, Khan AR, Mittal RJ, Nawaz FA, Essar MY, et al. Implications of social media misinformation on COVID-19 vaccine confidence among pregnant women in Africa. *Clin Epidemiol Glob Health* [Internet]. 2022 Mar;14:100981. Available from: <https://linkinghub.elsevier.com/retrieve/pii/S2213398422000215>
6. Covid vaccine misinformation still fuels fears surrounding pregnancy, a new study finds. [Internet]. [cited 2021 Nov 8]. Available from: <https://www.nytimes.com/2022/06/03/health/covid-vaccine-pregnancy-misinformation.html>
7. WHO. WHO ten threats for global health [Internet]. [cited 2022 Jul 15]. Available from: <https://www.who.int/news-room/spotlight/ten-threats-to-global-health-in-2019>
8. Kilich E, Dada S, Francis MR, Tazare J, Chico RM, Paterson P, et al. Factors that influence vaccination decisionmaking among pregnant women: A systematic review and meta-analysis. *PLoS One*. 2020 Jul 1;15(7 July 2020).

### Supplementary file 3: full search strategy

Database: PubMed

Date searched: 18<sup>th</sup> July 2022

Filters used: from 2018/11/23 – 2022/7/18 (present day)

Results: 477 results

| Query                                                                                                                                                                                                                                                                                                                                                                                                                                                                                                                                                                                                                                                                                                                                                                                                                                                                                                                                                                                                                                                                                                               | Results |
|---------------------------------------------------------------------------------------------------------------------------------------------------------------------------------------------------------------------------------------------------------------------------------------------------------------------------------------------------------------------------------------------------------------------------------------------------------------------------------------------------------------------------------------------------------------------------------------------------------------------------------------------------------------------------------------------------------------------------------------------------------------------------------------------------------------------------------------------------------------------------------------------------------------------------------------------------------------------------------------------------------------------------------------------------------------------------------------------------------------------|---------|
| Search: (((((Vaccin* OR Immuniz* OR immunis* OR antibodies OR immune response)))) AND (((confidence OR awareness OR attitude* OR anxiety OR trust* OR intent* OR dilemma OR perception* OR misconception* OR behaviour OR behavior OR anti-vaccin* OR decision making OR vaccination refusal OR fear* OR distrust OR mistrust OR hesitancy OR controvers* OR belief* OR criticis* OR misinformation OR intent* OR choice* OR concern* OR knowledge OR acceptance OR willingness OR uptake OR barrier* OR disinformation OR complacency OR fake news)))) AND (((pregnan* OR maternal OR prenatal OR antenatal OR parent* OR lactating* OR lactation OR breast milk OR breastfeeding))) AND ((social media OR internet OR website* OR communication* OR social network* social behavior OR social behaviour OR message* OR forum OR fora OR blog* OR discussion group* OR online OR Facebook OR Twitter OR Pinterest OR LinkedIn OR Instagram OR Reddit OR Youtube OR Messenger OR Whatsapp OR Telegram)) AND (COVID* OR SARS-CoV-2 OR COVID19* OR corona*) Filters: from 2018/11/23 - 2022/7/18 Sort by: Most Recent | 477     |

The database was searched without language restrictions. The languages used within the 477 records were French, German and English. Since the authors are educated in these languages, this formed no issue.
