# Supplementary material for: Influence of the COVID-19 pandemic and social media on the behaviour of pregnant and lactating women towards vaccination: a scoping review
Source: PubMed Central journal article supplement — BMJ Open. 2023 Feb 10;13(2):e066367. doi: 10.1136/bmjopen-2022-066367 (PMC9922880; doi:10.1136/bmjopen-2022-066367), 2023-02-10
Supplement: bmjopen-2022-066367.reviewer_comments.pdf [file bmjopen-2022-066367.reviewer_comments.pdf]

## PEER REVIEW HISTORY

BMJ Open publishes all reviews undertaken for accepted manuscripts. Reviewers are asked to complete a checklist review form (<http://bmjopen.bmj.com/site/about/resources/checklist.pdf>) and are provided with free text boxes to elaborate on their assessment. These free text comments are reproduced below.

### ARTICLE DETAILS

|                            |                                                                                                                                                |
|----------------------------|------------------------------------------------------------------------------------------------------------------------------------------------|
| <b>TITLE (PROVISIONAL)</b> | The influence of the COVID-19 pandemic and social media on the behaviour of pregnant and lactating women towards vaccination: a scoping review |
| <b>AUTHORS</b>             | De Brabandere, Larissa; Hendrickx, Greet; Poels, Karolien; Daelemans, Walter; Van Damme, Pierre; Maertens, Kirsten                             |

### VERSION 1 – REVIEW

|                        |                                                                                       |
|------------------------|---------------------------------------------------------------------------------------|
| <b>REVIEWER</b>        | Perez, Marta<br>The University of Texas at Austin Dell Medical School, Women's Health |
| <b>REVIEW RETURNED</b> | 22-Aug-2022                                                                           |

|                         |                                                                                                                                                                                                                                                                          |
|-------------------------|--------------------------------------------------------------------------------------------------------------------------------------------------------------------------------------------------------------------------------------------------------------------------|
| <b>GENERAL COMMENTS</b> | This is an expansive, international review of vaccine acceptance attitudes and uptake among pregnant and lactating individuals before and during the COVID19 pandemic. I think there could be improvements in the fluidity of English language but the content is sound. |
|-------------------------|--------------------------------------------------------------------------------------------------------------------------------------------------------------------------------------------------------------------------------------------------------------------------|

### VERSION 1 – AUTHOR RESPONSE

*Reviewer: 1*

*Dr. Marta Perez, The University of Texas at Austin Dell Medical School*

This is an expansive, international review of vaccine acceptance attitudes and uptake among pregnant and lactating individuals before and during the COVID19 pandemic. I think there could be improvements in the fluidity of English language but the content is sound.

Competing interests of Reviewer: I authored one of the manuscripts listed in the review.

We submitted our review for proofreading to Linguapolis, a language center in Antwerp (Belgium) known for its quality and academic expertise.
