# Supplementary material for: Influence of the COVID-19 pandemic and social media on the behaviour of pregnant and lactating women towards vaccination: a scoping review
Source: PubMed Central journal article supplement — BMJ Open. 2023 Feb 10;13(2):e066367. doi: 10.1136/bmjopen-2022-066367 (PMC9922880; doi:10.1136/bmjopen-2022-066367), 2023-02-10
Supplement: bmjopen-2022-066367supp003.pdf [file bmjopen-2022-066367supp003.pdf]

**Supplementary file 3: full search strategy**

Database: PubMed

Date searched: 18<sup>th</sup> July 2022

Filters used: from 2018/11/23 – 2022/7/18 (present day)

Results: 477 results

| Query                                                                                                                                                                                                                                                                                                                                                                                                                                                                                                                                                                                                                                                                                                                                                                                                                                                                                                                                                                                                                                                                                                               | Results |
|---------------------------------------------------------------------------------------------------------------------------------------------------------------------------------------------------------------------------------------------------------------------------------------------------------------------------------------------------------------------------------------------------------------------------------------------------------------------------------------------------------------------------------------------------------------------------------------------------------------------------------------------------------------------------------------------------------------------------------------------------------------------------------------------------------------------------------------------------------------------------------------------------------------------------------------------------------------------------------------------------------------------------------------------------------------------------------------------------------------------|---------|
| Search: (((((Vaccin* OR Immuniz* OR immunis* OR antibodies OR immune response)))) AND (((confidence OR awareness OR attitude* OR anxiety OR trust* OR intent* OR dilemma OR perception* OR misconception* OR behaviour OR behavior OR anti-vaccin* OR decision making OR vaccination refusal OR fear* OR distrust OR mistrust OR hesitancy OR controvers* OR belief* OR criticis* OR misinformation OR intent* OR choice* OR concern* OR knowledge OR acceptance OR willingness OR uptake OR barrier* OR disinformation OR complacency OR fake news)))) AND (((pregnan* OR maternal OR prenatal OR antenatal OR parent* OR lactating* OR lactation OR breast milk OR breastfeeding))) AND ((social media OR internet OR website* OR communication* OR social network* social behavior OR social behaviour OR message* OR forum OR fora OR blog* OR discussion group* OR online OR Facebook OR Twitter OR Pinterest OR LinkedIn OR Instagram OR Reddit OR Youtube OR Messenger OR Whatsapp OR Telegram)) AND (COVID* OR SARS-CoV-2 OR COVID19* OR corona*) Filters: from 2018/11/23 - 2022/7/18 Sort by: Most Recent | 477     |

The database was searched without language restrictions. The languages used within the 477 records were French, German and English. Since the authors are educated in these languages, this formed no issue.
